# Supplementary material for: Pan-mitogenomics reveals the genetic basis of cytonuclear conflicts in citrus hybridization, domestication, and diversification
Source: PubMed Central journal article supplement — Proc Natl Acad Sci U S A. 2022 Oct 19;119(43):e2206076119. doi: 10.1073/pnas.2206076119 (PMC9618123; doi:10.1073/pnas.2206076119), 2022-10-19
Supplement: pnas.2206076119.sapp.pdf [file pnas.2206076119.sapp.pdf]

## Supplementary Methods

### Mitochondrial Genome Assembly and Annotation.

To obtain the high-quality mitochondrial genome assemblies, the data from the long reads were used to de novo assemble the mitochondrial genome separately. The average coverage of previously published reads was downsampled to ~4 Gb. The mitochondrial genome assembly was constructed in SPAdes v.3.12.0 (1) and BLAST v.2.9.0 (2). First, the long and short reads (for each sample) were combined to assemble the draft mitochondrial contigs in the HYBRIDSPADES program integrated in SPAdes with the parameter “-k 127 -t 20 -m 500” followed Gu et al. (3). Second, the assembled contigs were aligned to the two previously published mitochondrial genomes from mandarin G1 or pummelo HBP in BLASTN with the parameter “-evalue 1e-6 -outfmt 6.” As a result, the potential high-coverage mitochondrial contigs were filtered (length >5 kb, identity >95%). To further reduce the bias from the chloroplast and nuclear genomes, we filtered the contigs based on coverage estimations. Based on our data, the coverage of the chloroplast contigs was about three to five times higher than that of the mitochondrial sequences, and the coverage of the nuclear genome contigs was ~1/40 of the mitochondrial contigs. Subsequently, we aligned the assemblies to both the mitochondrial genomes of mandarin G1 and pummelo HBP. The results were combined to determine the order of the contigs. Notably, the assembly of the grapefruit cultivar JW was different because the mitochondrial sequences were directly obtained from the Illumina sequencing platform. Therefore, the assemblies for grapefruit cultivar JW were used only as short reads. The other steps were identical to the steps used with samples that were analyzed with both long and short reads. To increase the quality and continuity of each assembly, we performed Sanger sequencing to verify the linkage of contigs and to fill the gaps (*SI Appendix, Table 3*). Finally, two mitochondrial genome assemblies (three gaps in SJG

and two gaps in ZK) were assembled into circular physical maps. We collected the 10 contig-level assemblies and aligned them to the mitochondrial reference genome SJG in RaGOO v1.1 with the default options (4). As a result, we obtained 10 reference-guided scaffold-level assemblies. The gaps between the contigs were connected by “N.” The pan-genome of the mitochondrial genome in citrus was constructed in minigraph-0.13 (r397) with an incremental graph generation mode (<https://github.com/lh3/minigraph>). For the annotation of mitochondrial genomes, we used the MITOFY webserver to predict the conserved protein-coding genes (5). The ORFs were predicted in Unipro UGENE (v37.0) (6). Subsequently, we excavated the chimeric ORFs (>300 bp) containing conserved gene fragments in the intergenic region by using custom scripts (*SI Appendix*, Table 4). At the same time, the tRNA and ribosomal RNA genes were identified in tRNAscan-SE v1.21 and the RNAmmer 1.2 server with default parameters, respectively (7, 8).

### **Identification of Structural Variations.**

To construct the mitochondrial SV maps, we identified four categories of SVs—deletions (DELs), insertions (INSs), inversions (INVs), and duplications (DUPs)—from three methods. First, we performed a whole-genome alignment by using MUM&Co with a genome size “-g 500000” (9), based on the kumquat SJG reference mitochondrial genome (filling the gaps). Second, we aligned the long reads from 11 citrus accessions to the kumquat SJG mitochondrial reference genome. Third, SVs were identified from Illumina short reads from 184 citrus accessions. When identifying the SVs from long read mapping, we mapped the PacBio/Nanopore long reads to the kumquat SJG reference mitochondrial genome in Minimap2 (10). The PacBio genomic reads were mapped in “-ax map-pb” mode, and Oxford Nanopore genomic reads were mapped in “-ax map-ont” mode. Then, the SVs were identified in Sniffles v2.0.6, followed by multiple-sample SV calling mode and cuteSV v1.0.13 with

the default options with different sequencing platforms (11, 12). For the SVs identified with Illumina short reads, we first trimmed the adapter sequences by using Fastp (13) and then mapped the clean reads to the kumquat SJG reference mitochondrial genome via Burrows–Wheeler alignment maximal exact match (14). SV site calling (BCF files) was based on BAM files in DELLY v1.0.3 followed by germline SV calling AQ11 mode (15). Subsequently, we used BCFtools to generate a VCF file including the SV genotypes. Finally, we plotted the BAM files by using the Integrative Genomics Viewer (IGV) v2.13.2 (16) and examined the split or link reads and the coverage depth for the SVs that we identified.

### **Construction of Variant Maps.**

To elucidate the evolutionary patterns between cytoplasmic genomes and nuclear genomes, we generated three variation maps including the nuclear, mitochondrial, and chloroplast variation maps. The nuclear variation map was constructed with short reads from 184 accessions. The reads were mapped to the *Fortunella* reference nuclear genome (a chromosome-level reference) via Burrows–Wheeler alignment maximal exact match, after the removal of adapters in Fastp. The BAM alignment files were sorted with SAMtools (17). PCR duplicates were removed with MarkDuplicates in Picard 2.19.0 (<https://github.com/broadinstitute/picard>). The genotype information was obtained with Deepvariant (rc1.0.0) and default options (18). The GVCF files AQ12 from 184 accessions were consolidated into a single VCF file in GLnexus (v1.2.7) with the DeepVariantWGS config (19). To obtain reliable population structure and robust phylogeny, we filtered nuclear genomic variations based on depth of coverage and missing rate. The SNPs and indels were filtered via VCFtools with the following criteria: variant quality >2.0, quality score >40.0, mapping quality >30.0, genotype calls with a depth >2 or <100, and <20% missing genotypes across all samples. In addition, the

nuclear variation dataset was pruned with LD values (10-kb sliding windows and an  $r^2$  threshold of 0.5) for the phylogeny and population structure analysis.

The mitochondrial and chloroplast variation maps were also filtered with a depth >2 but were processed differently than the nuclear genomic sequence data in two aspects (1): homologous regions of the nuclear genome and (2) missing rate filtering. In detail, the regions of homology among the nuclear, mitochondrial, and chloroplast genomes were detected in BLASTN v.2.9.0, and the cytoplasmic genome variations in the homologous regions were marked. We observed low coverage in species-specific SVs that occurred because of occasional paternal leakage. Therefore, unfiltered mitochondrial and chloroplast variation maps were used to construct phylogenetic network trees and to estimate the level of mitochondrial heteroplasmy.

## References

1. A. Bankevich *et al.*, SPAdes: A new genome assembly algorithm and its applications to single-cell sequencing. *J. Comput. Biol.* **19**, 455–477 (2012).
2. C. Camacho *et al.*, BLAST+: Architecture and applications. *BMC Bioinformatics* **10**, 421 (2009).
3. Z. Gu *et al.*, Cytoplasmic and nuclear genome variations of rice hybrids and their parents inform the trajectory and strategy of hybrid rice breeding. *Mol. Plant* **14**, 2056–2071 (2021).
4. M. Alonge *et al.*, RaGOO: Fast and accurate reference-guided scaffolding of draft genomes. *Genome Biol.* **20**, 224 (2019).
5. A. J. Alverson *et al.*, Insights into the evolution of mitochondrial genome size from complete sequences of *Citrullus lanatus* and *Cucurbita pepo* (Cucurbitaceae). *Mol. Biol. Evol.* **27**, 1436–1448 (2010).



6. R. Rose, O. Golosova, D. Sukhomlinov, A. Tiunov, M. Prosperi, Flexible design of multiple metagenomics classification pipelines with UGENE. *Bioinformatics* **35**, 1963–1965 (2019).
7. T. M. Lowe, S. R. Eddy, tRNAscan-SE: A program for improved detection of transfer RNA genes in genomic sequence. *Nucleic Acids Res.* **25**, 955–964 (1997).
8. K. Lagesen *et al.*, RNAmmer: Consistent and rapid annotation of ribosomal RNA genes. *Nucleic Acids Res.* **35**, 3100–3108 (2007).
9. S. O’Donnell, G. Fischer, MUM&Co: Accurate detection of all SV types through whole-genome alignment. *Bioinformatics* **36**, 3242–3243 (2020).
10. H. Li, Minimap2: Pairwise alignment for nucleotide sequences. *Bioinformatics* **34**, 3094–3100 (2018).
11. F. J. Sedlazeck *et al.*, Accurate detection of complex structural variations using single-molecule sequencing. *Nat. Methods* **15**, 461–468 (2018).
12. T. Jiang *et al.*, Long-read-based human genomic structural variation detection with cuteSV. *Genome Biol.* **21**, 189 (2020).
13. S. Chen, Y. Zhou, Y. Chen, J. Gu, fastp: An ultra-fast all-in-one FASTQ preprocessor. *Bioinformatics* **34**, i884–i890 (2018).
14. H. Li, Aligning sequence reads, clone sequences and assembly contigs with BWA-MEM. *arXiv: Genomics* (2013).  
<https://doi.org/10.48550/arXiv.1303.3997>.
15. T. Rausch *et al.*, DELLY: Structural variant discovery by integrated paired-end and split-read analysis. *Bioinformatics* **28**, i333–i339 (2012).

16. J. T. Robinson *et al.*, Integrative genomics viewer. *Nat. Biotechnol.* **29**, 24–26 (2011).
17. H. Li *et al.*; 1000 Genome Project Data Processing Subgroup, The sequence alignment/map format and SAMtools. *Bioinformatics* **25**, 2078–2079 (2009).
18. R. Poplin *et al.*, A universal SNP and small-indel variant caller using deep neural networks. *Nat. Biotechnol.* **36**, 983–987 (2018).
19. T. Yun *et al.*, Accurate, scalable cohort variant calls using DeepVariant and GLnexus. *Bioinformatics* **36**, 5582–5589 (2021).

## Mandarin 'G1'

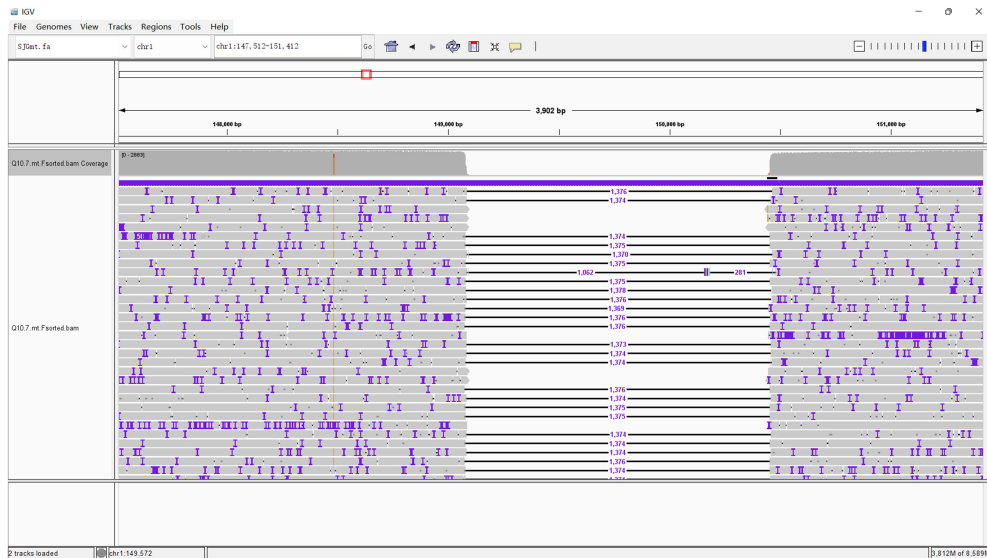

## Kumquat 'SJG'

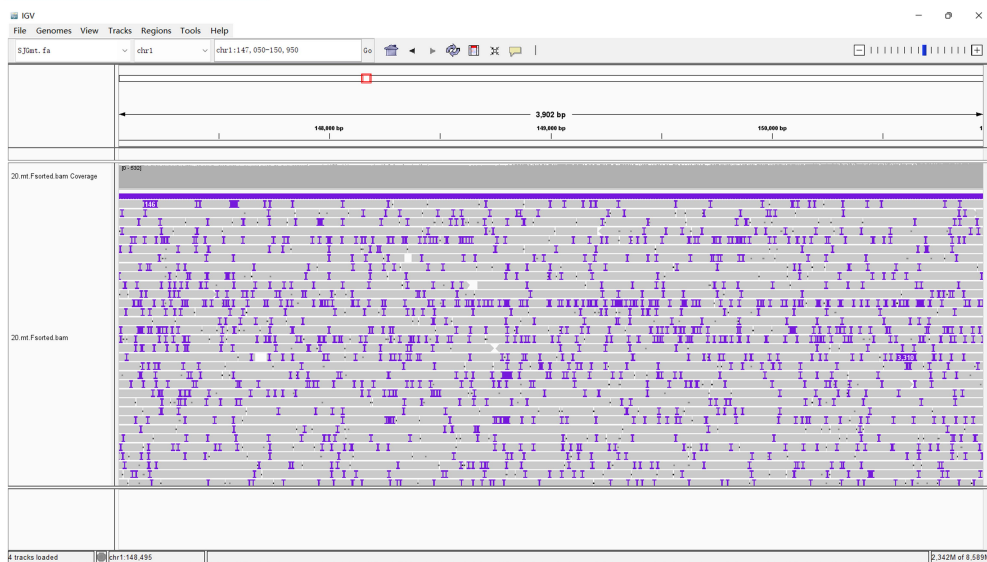

**Supplementary Fig. 1. The example of 1375 bp deletion in mandarin G1 mitochondrial genome identified by the long-reads alignment. (A) The PacBio long reads from mandarin cultivar G1 were mapped to the kumquat SJG reference mitochondrial genome. (B) The PacBio long reads from kumquat SJG were mapped to its own mitochondrial genome. The window from 147,050 to 150,950 bp.**

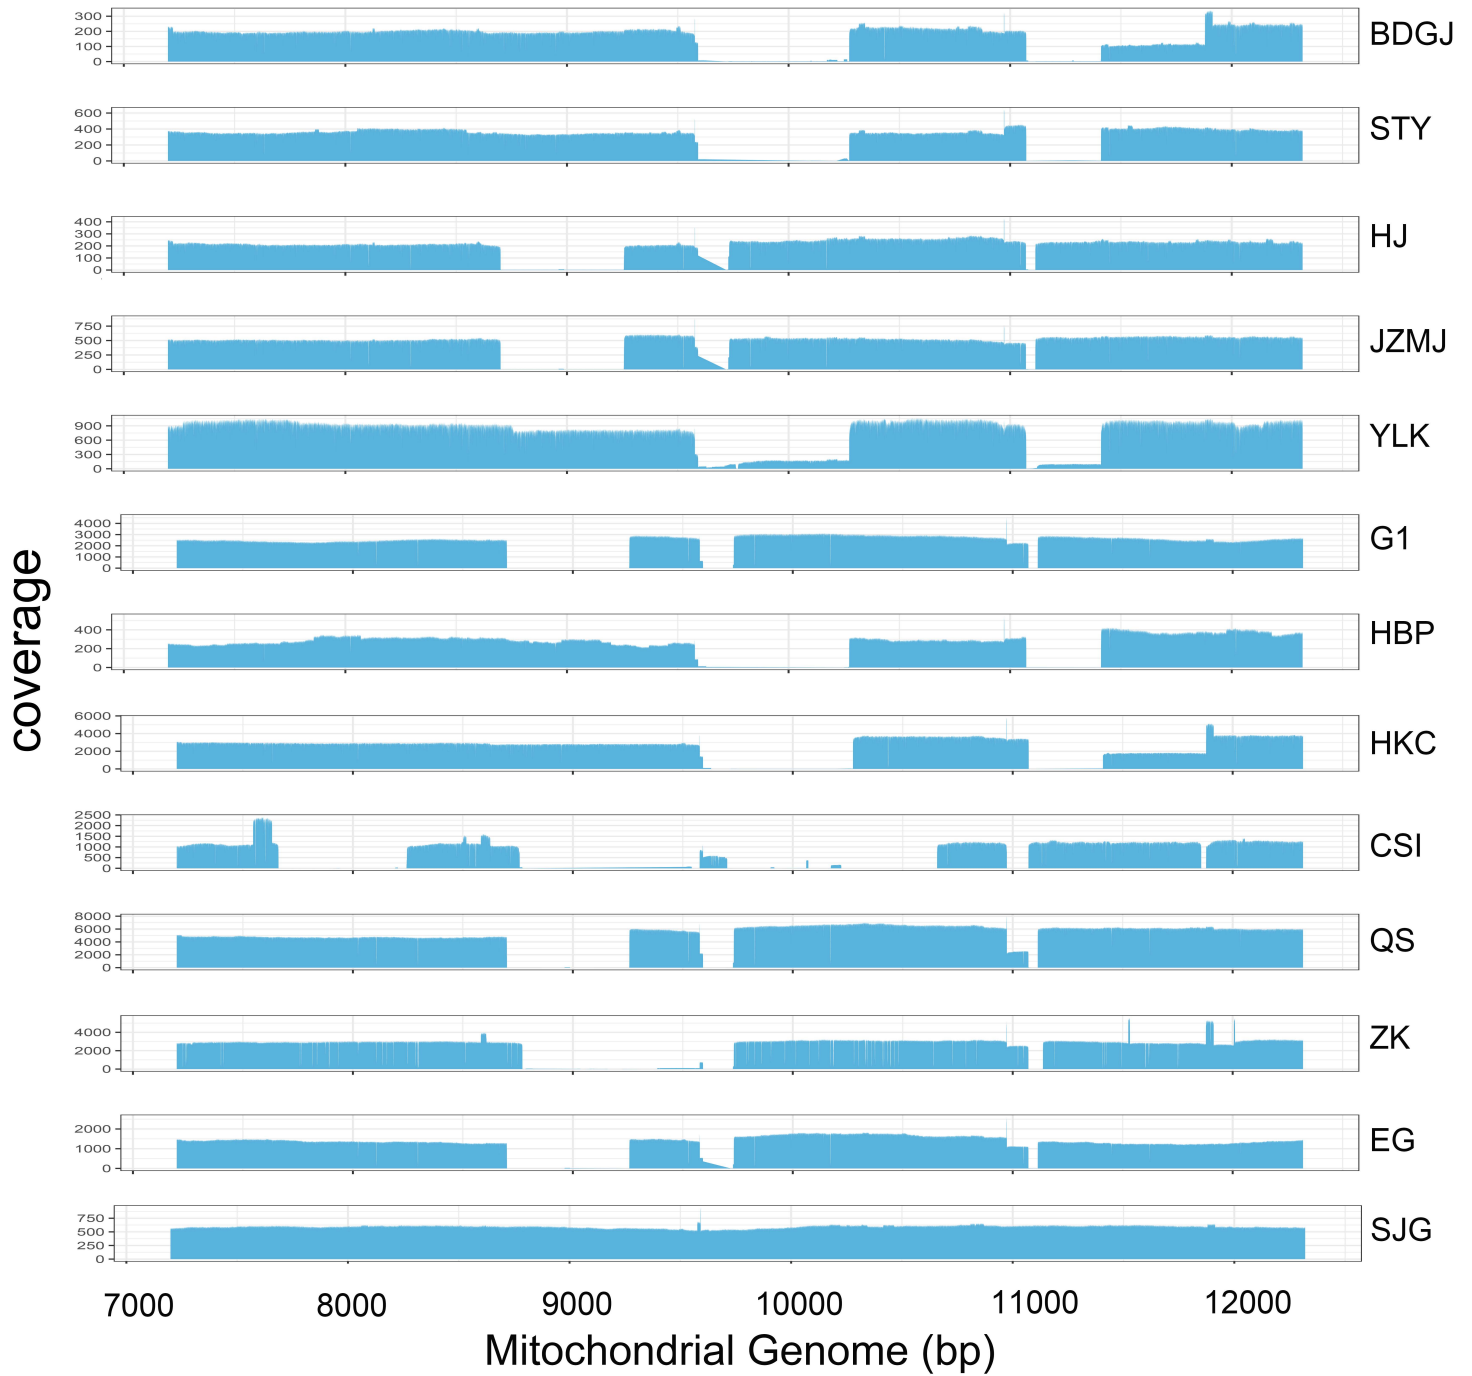

**Supplementary Fig. 2. The SVs and coverage of long reads mapping in mitochondrial genome.** The 13 accessions of PacBio or Nanopore long reads were mapped to the kumquat SJG reference mitochondrial genome. The x-axis showed the window from 7,000 to 12,000 bp. The y-axis showed the coverage of each accession.

## Mandarin '21OBN'

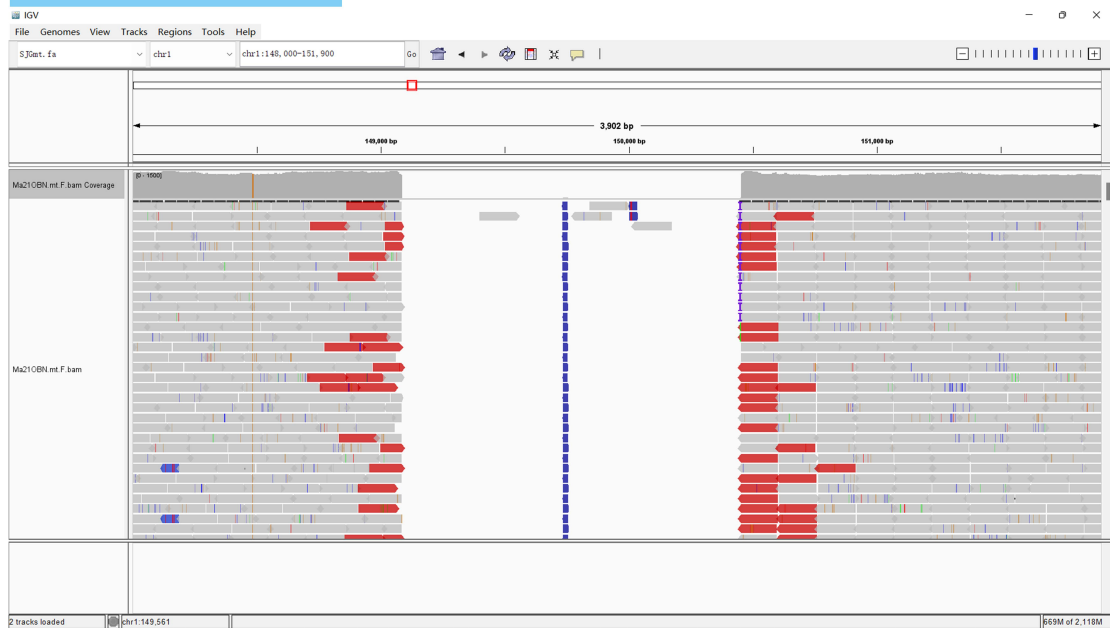

## Kumquat 'LH10'

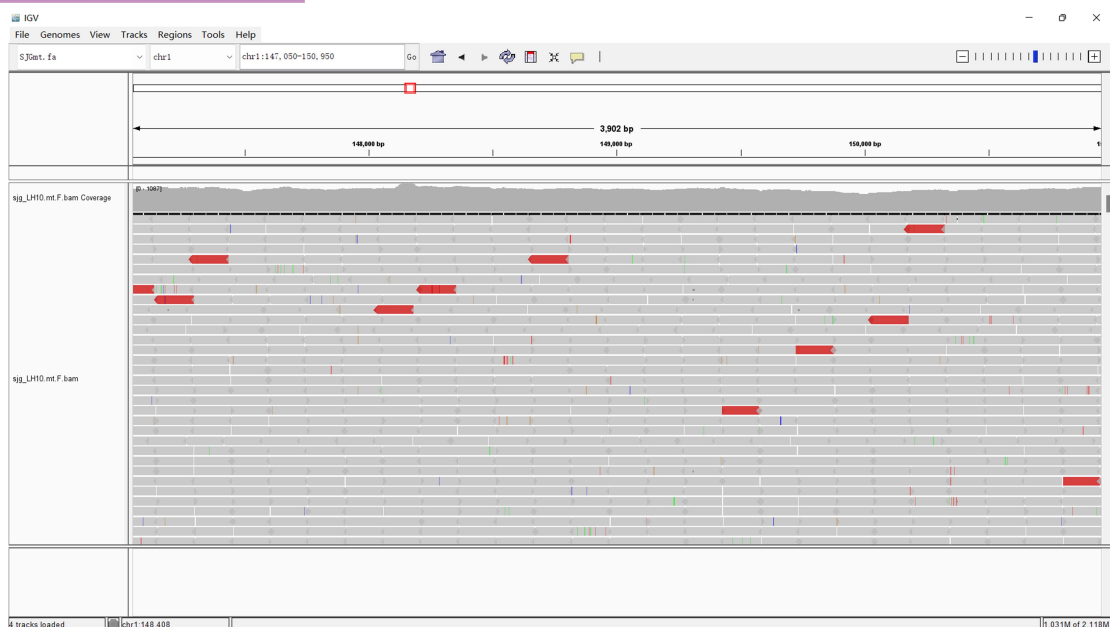

**Supplementary Fig. 3. The example of 1375 bp deletion in mandarin 'G1' mitochondrial genome identified by the short-reads alignment. (A) The Illumina short reads from mandarin sequenced sample 21OBN were mapped to the kumquat SJG reference mitochondrial genome. (B) The Illumina short reads from kumquat sequenced sample LH10 were mapped to the kumquat SJG reference mitochondrial genome. The window from 147,050 to 150,950 bp as well as Supplementary Fig. 4.**

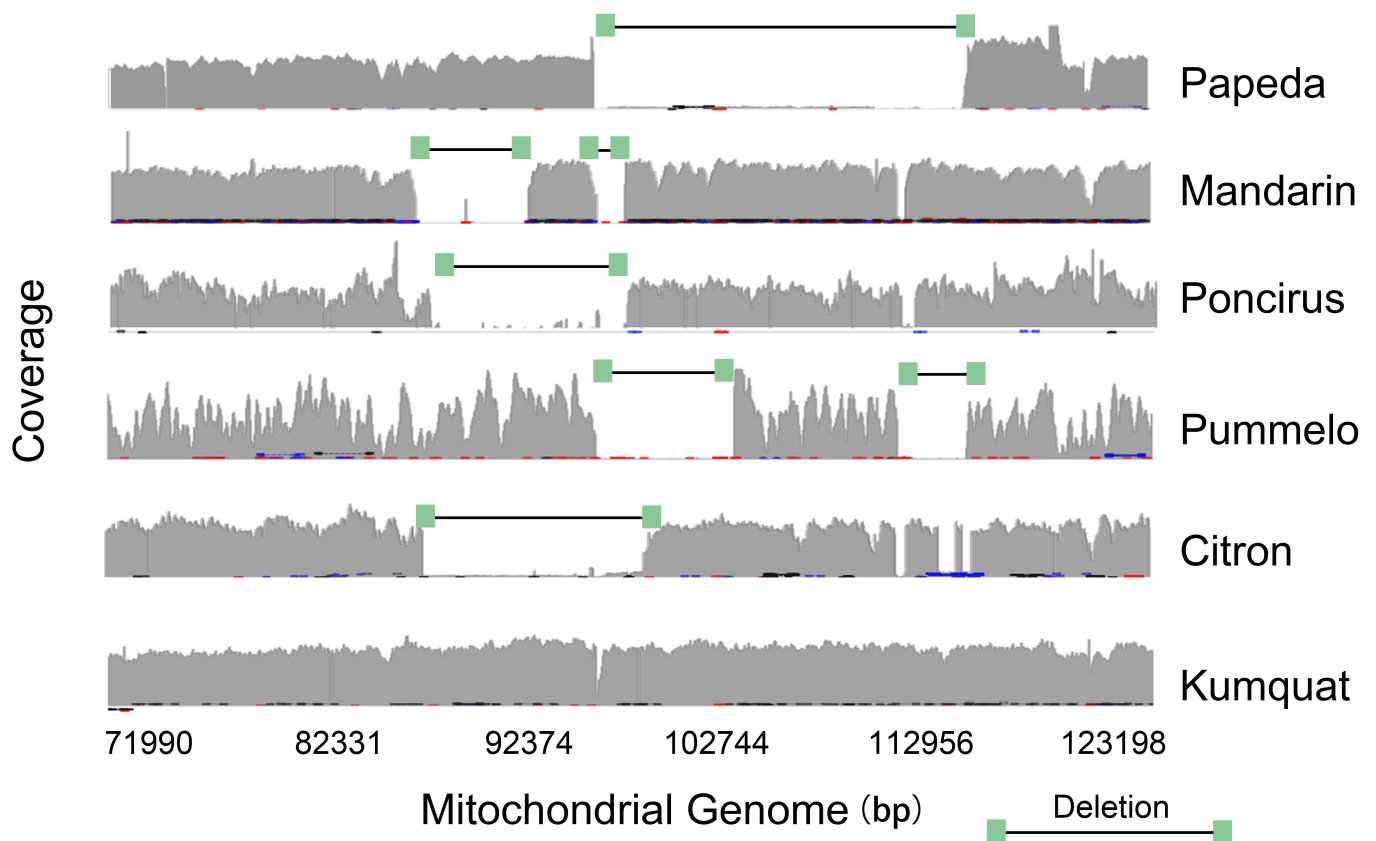

**Supplementary Fig. 4. The SVs and coverage of short reads mapping in mitochondrial genome.** The Illumina short reads in six individuals from six species (papeda, mandarin, poncirus, pummelo, citron and kumquat) were mapped to the kumquat SJG reference mitochondrial genome. The x-axis showed the window from 71,990 to 123,198 bp. The y-axis showed the coverage of each accession.

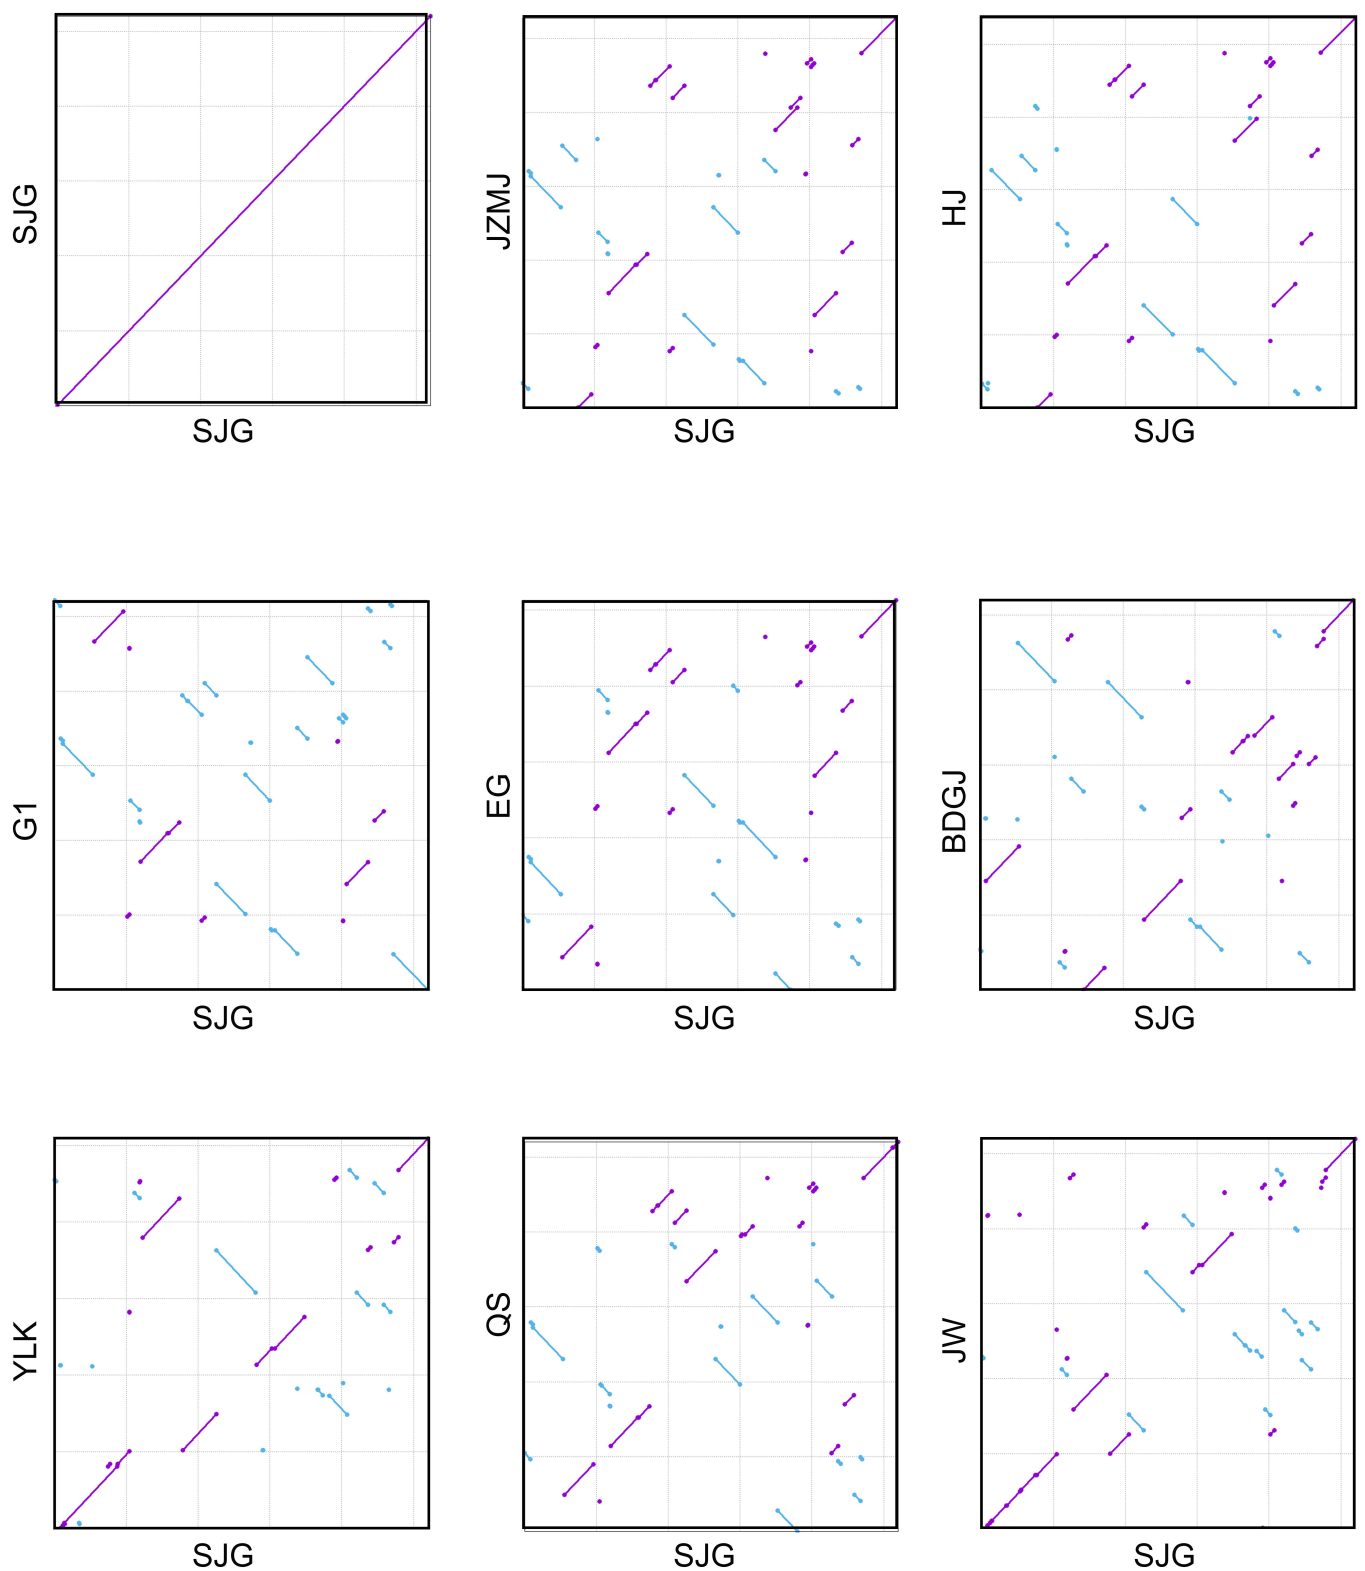

**Supplementary Fig. 5. The collinearity analysis between nine assemblies and the kumquat SJG reference mitochondrial genome.** The nine assemblies were linearized and mapped to the kumquat SJG reference mitochondrial genome. The x-axis showed the SJG mitochondrial genome, while the y-axis showed the nine target assemblies including the SJG mitochondrial genome.

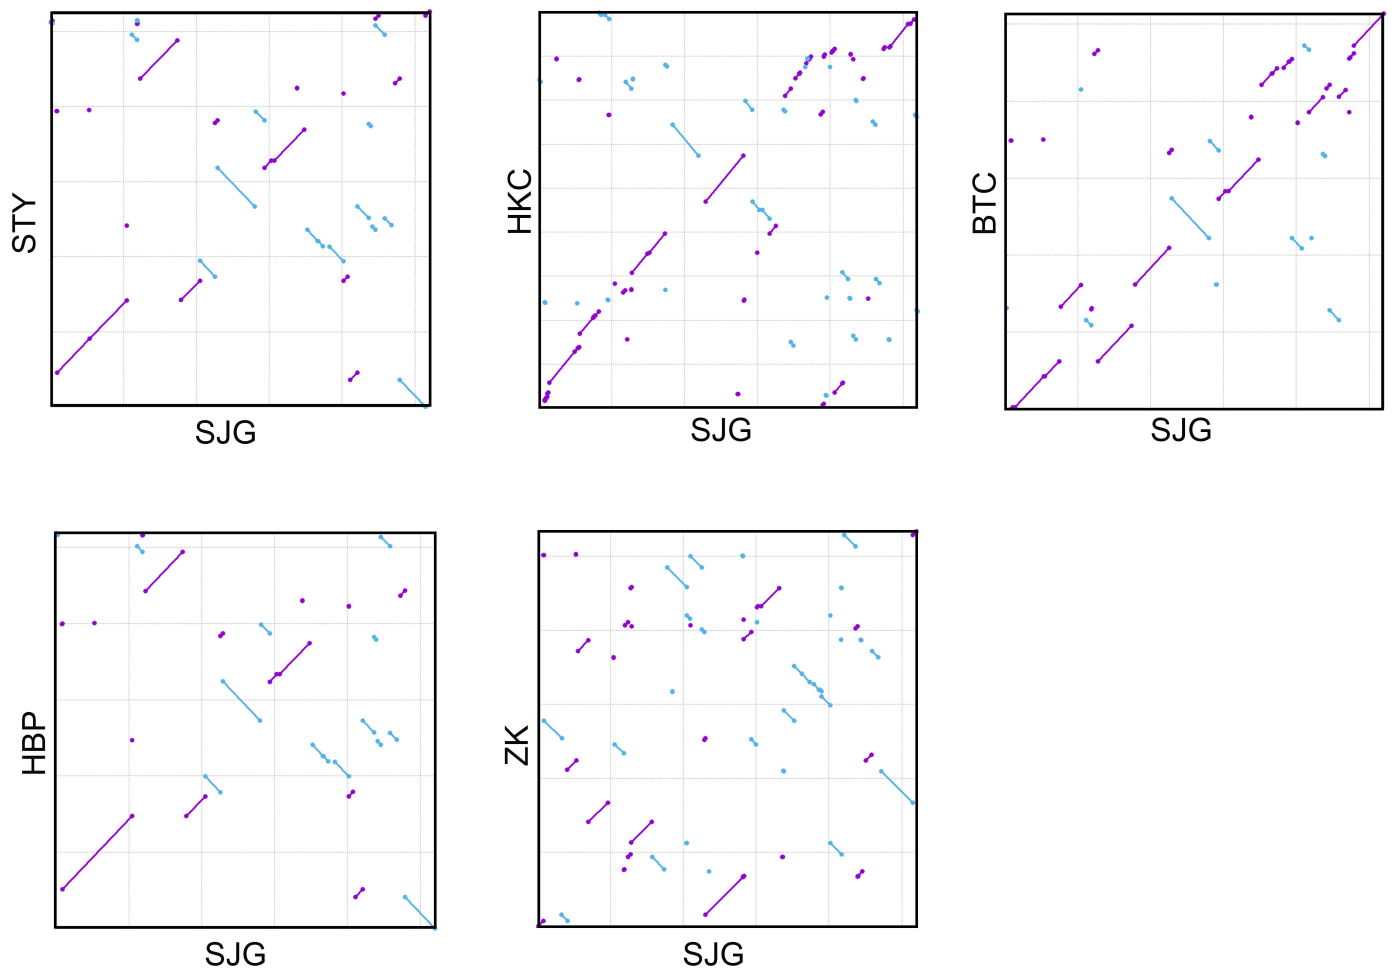

**Supplementary Fig. 6. The collinearity analysis between five assemblies and the kumquat SJG reference mitochondrial genome.** Five other assemblies added after the Supplementary Fig. 5.



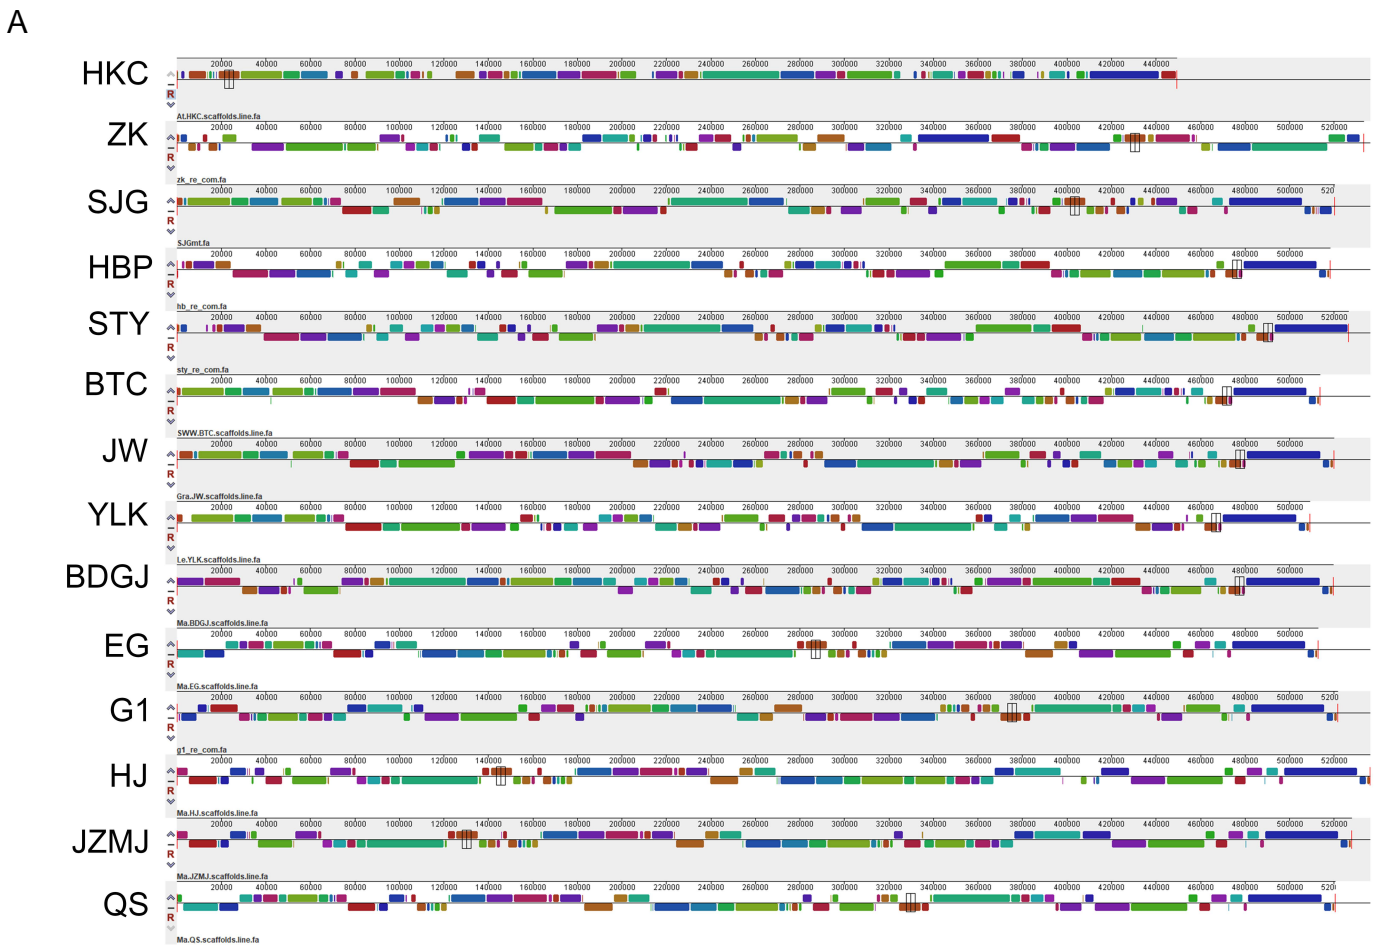

**B**

|      |                                                                                                                                                                                                                                                              |
|------|--------------------------------------------------------------------------------------------------------------------------------------------------------------------------------------------------------------------------------------------------------------|
| HKC  | 1, 2, 3, 4, 5, 6, 7, 8, 9, 10, 11, 12, 13, 14, 15, 16, 17, 18, 19, 20, 21, 22, 23, 24, 25, 26, 27, 28, 29, 30, 31, 32, 33, 34, 35, 36, 37, 38, 39, 40, 41, 42, 43, 44, 45, 46, 47, 48, 49, 50, 51, 52, 53, 54, 55, 56, 57                                    |
| ZK   | 14, 39, -22, -17, 51, 52, -10, -43, 15, -35, -37, -23, -28, -27, 29, 30, -36, 46, 47, 42, -11, -38, -21, 50, -49, 44, -8, 1, 5, -32, -31, 18, -16, -7, -40, 54, -9, 55, 56, 57, -13, -12, -25, -24, 53, 2, 3, 4, -20, 45, 41, 26, -19, -34, -33, 6, 48       |
| SJG  | 1, 5, 6, 7, 11, 12, 13, -57, 18, -47, -46, -45, 20, 23, 24, 25, 26, -19, -37, -36, -35, -3, 32, 33, 34, 15, -42, -31, -30, -29, 27, 28, -41, -40, 44, -8, 50, -49, 53, 2, 4, -22, -17, 51, 52, -10, -43, 16, -38, -21, 54, -9, 55, 56, -39, -14, -48         |
| HBP  | -48, 16, 18, 19, -26, -25, -24, -23, -20, 45, 46, -54, 15, -42, 8, -44, 40, 41, -28, -27, 29, 30, 31, 32, 33, 34, -22, -17, 51, 52, -10, -43, -47, -38, -21, 50, -49, -36, -35, -3, -2, -53, 37, 57, -13, -12, -11, -7, -6, -5, -1, -4, -9, 55, 56, -39, -14 |
| STY  | 14, 39, -56, -48, 16, 18, 19, -26, -25, -24, -23, -20, 45, 46, -54, 15, -42, 8, -44, 40, 41, -28, -27, 29, 30, 31, 32, 33, 34, -22, -17, 51, 52, -10, -43, -47, -38, -21, 50, -49, -36, -35, -3, -2, -53, 37, 57, -13, -12, -11, -7, -6, -5, -1, -4, -9, 55  |
| BTC  | 1, 5, 6, 7, 11, 12, 23, 24, 25, 26, -19, -18, -16, 48, 13, -57, -37, -36, -35, -3, -2, -53, 49, -34, -33, -32, -31, -30, -29, 27, 28, -41, -40, 44, -8, 42, -15, -22, -17, 51, 52, -10, -43, -47, -38, -21, 50, 54, -46, -45, 20, -4, -9, 55, 56, -39, -14   |
| JW   | 1, 5, 6, 7, 11, 12, 13, -57, -37, 53, 2, 3, 35, 36, 49, 23, 24, 25, 26, -19, -18, -16, 48, -50, 21, 38, 47, 43, 10, -52, -51, 17, 22, -34, -33, -32, -31, -30, -29, 27, 28, -41, -40, 44, -8, 42, -15, 54, -46, -45, 20, -4, -9, 55, 56, -39, -14            |
| YLK  | 1, 5, 6, 7, 11, 12, 13, -57, -37, -36, -35, -3, -2, -53, 49, -50, 15, -42, -31, -30, -29, 27, 28, -41, -40, 44, -8, 21, 38, 47, 43, 10, -52, -51, 17, 22, -34, -33, -32, 54, -46, -45, 20, 23, 24, 25, 26, -19, -18, -16, 48, -4, -9, 55, 56, -39, -14       |
| BDGJ | 25, 26, -19, -18, -16, 48, 41, -28, -27, 29, 30, 31, 32, 33, 34, 1, 5, 6, 7, 15, -42, 8, -44, 40, -24, -23, -22, -17, 51, 52, -10, -43, -47, -38, -21, 50, -49, 53, 2, 3, 35, 36, 37, 57, -13, -12, -11, 54, -46, -45, 20, -4, -9, 55, 56, -39, -14          |
| EG   | -50, 21, 38, 11, 12, 13, -57, 48, 42, -15, -34, -7, -6, -5, -1, 8, -44, 40, 41, -28, -27, 29, 30, -36, -33, -32, 3, 4, -22, -17, 51, 52, -10, -43, -47, -46, -45, 20, 23, 24, 25, 26, -19, 16, -18, 31, -35, -37, 53, 2, -49, 54, -9, 55, 56, -39, -14       |
| G1   | -48, 57, -13, -12, -11, -38, -21, 50, -35, -37, 53, 2, -49, 44, -8, 1, 5, 6, 7, 34, 15, -42, -31, 18, -16, 19, -26, -25, -24, -23, -20, 45, 46, 47, 43, 10, -52, -51, 17, 22, -4, -3, 32, 33, 36, -30, -29, 27, 28, -41, -40, 54, -9, 55, 56, -39, -14       |
| HJ   | 13, -57, 48, -1, 8, -44, 40, 41, -28, -27, 29, 30, -36, -33, -32, 3, 4, -22, -17, 51, 52, -10, -43, -47, -46, -45, 20, 23, 24, 25, 26, -19, 16, -18, 31, 42, -15, -34, -7, -6, -5, -12, -11, -38, -21, 50, -35, -37, 53, 2, -49, 54, -9, 55, 56, -39, -14    |
| JZMJ | 13, -57, 48, 41, -28, -27, 29, 30, -36, -33, -32, 3, 4, -22, -17, 51, 52, -10, -43, -47, -46, -45, 20, 23, 24, 25, 26, -19, 16, -18, 31, 42, -15, -34, -7, -6, -5, -1, 8, -44, 40, -12, -11, -38, -21, 50, -35, -37, 53, 2, -49, 54, -9, 55, 56, -39, -14    |
| QS   | -50, 21, 38, 11, 12, 13, -57, 48, 52, -10, -43, -47, -46, -45, 20, 23, 24, 25, 26, -19, 16, -18, 31, 42, -15, -34, -7, -6, -5, -1, 8, -44, 40, 41, -28, -51, 17, 22, -4, -3, 32, 33, 36, -30, -29, 27, -35, -37, 53, 2, -49, 54, -9, 55, 56, -39, -14        |

**Supplementary Fig. 7. The rearrangements analysis in 14 mitochondrial genomes. (A)** The rearrangements of the homologous conserved regions. The different color indicated different conserved regions. **(B)** The matrix of rearrangement blocks.

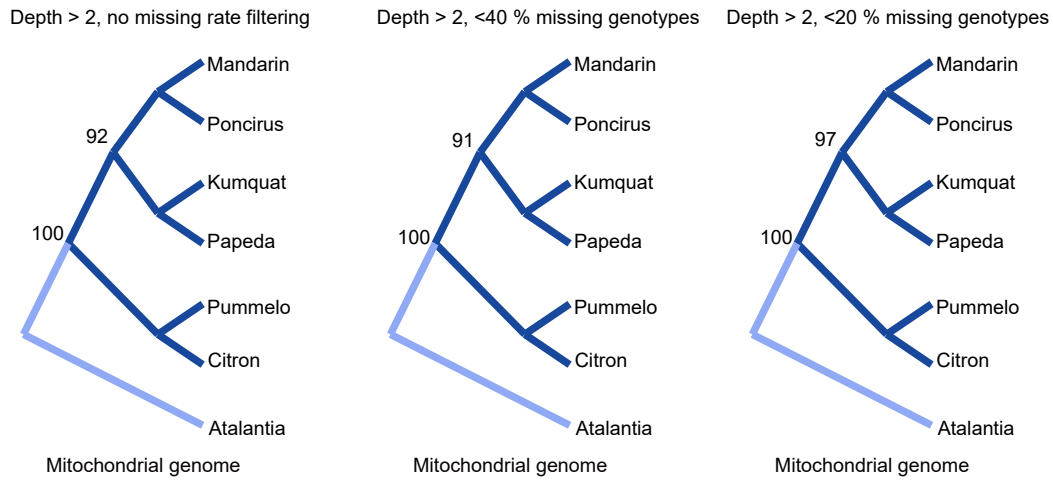

**Supplementary Fig. 8. The phylogeny of citrus mitogenome under the nuclear homologous region masking or different missing rate filtering.** The corresponding bootstrap value were represented in each phylogenetic tree.

A

Mitochondrial genome

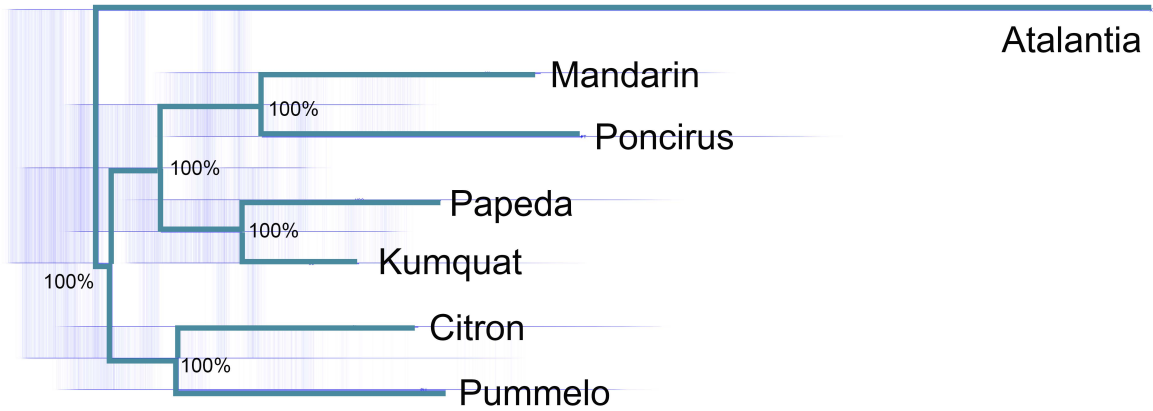

B

Chloroplast genome

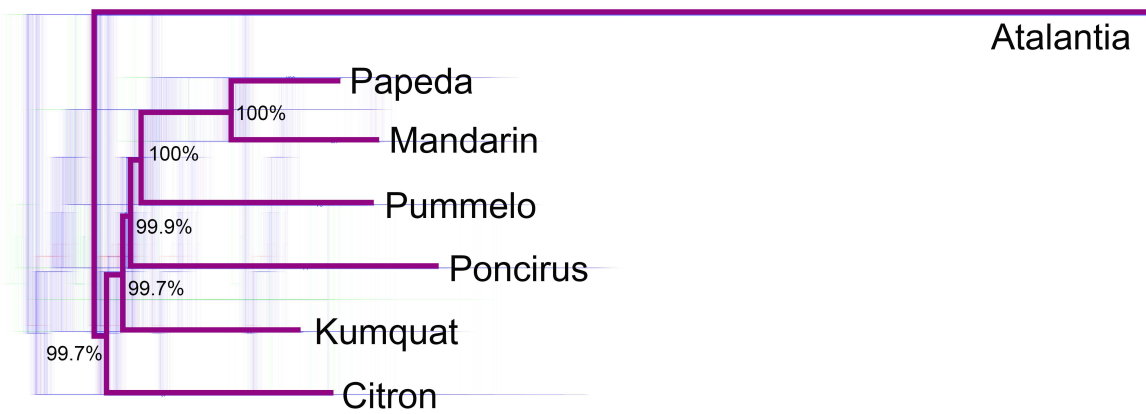

**Supplementary Fig. 9. The consensus tree of 1000 individual trees derived from 184 accessions of citrus.** (A) The consensus of mitochondrial genome variations, and the probability of each clade was shown. (B) The estimation based on the chloroplast genome variations.



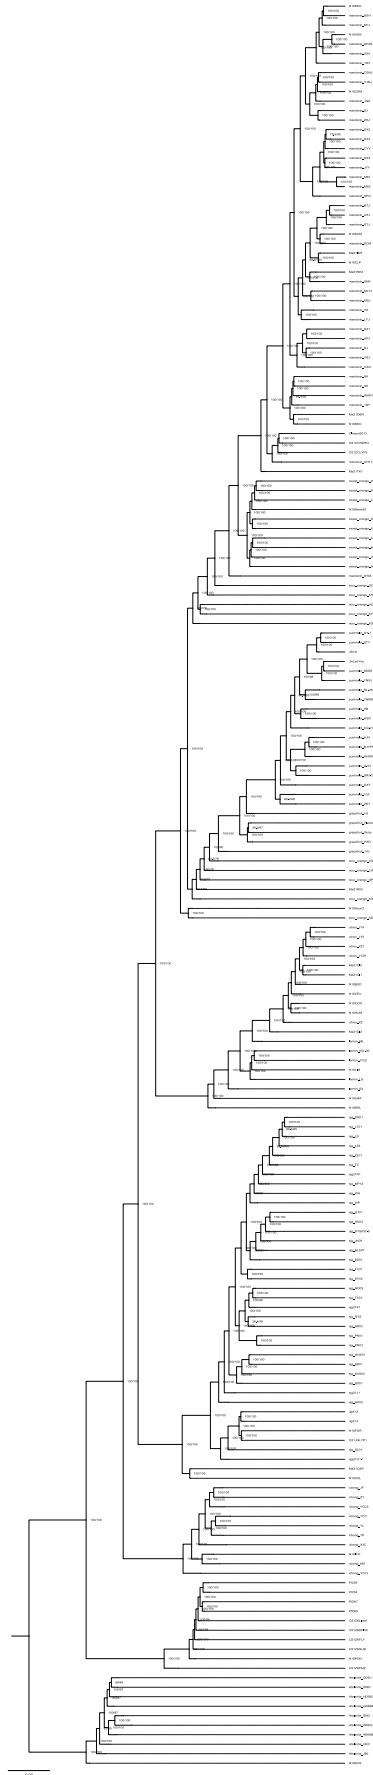

**Supplementary Fig. 11. The phylogenetic tree constructed using the nuclear genomic dataset.**

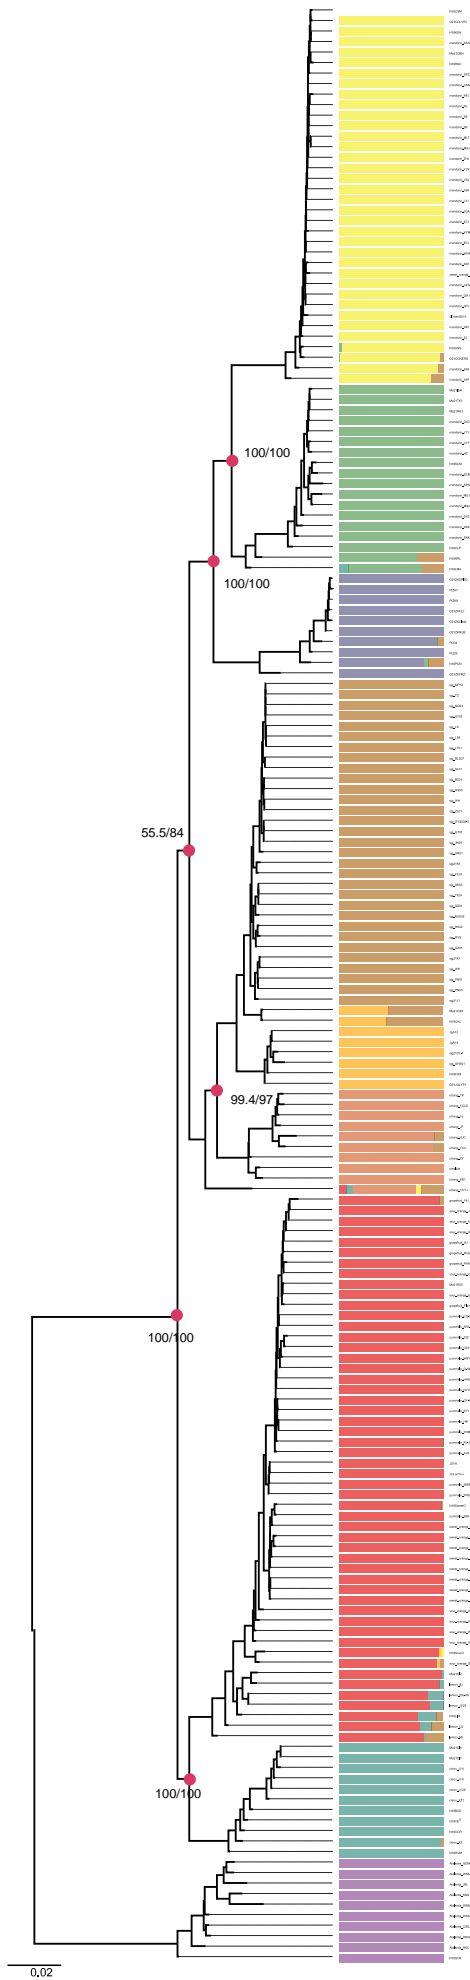

**Supplementary Fig. 12. The phylogenetic tree constructed using the mitochondrial genomic dataset associated with ancestry component analysis.**

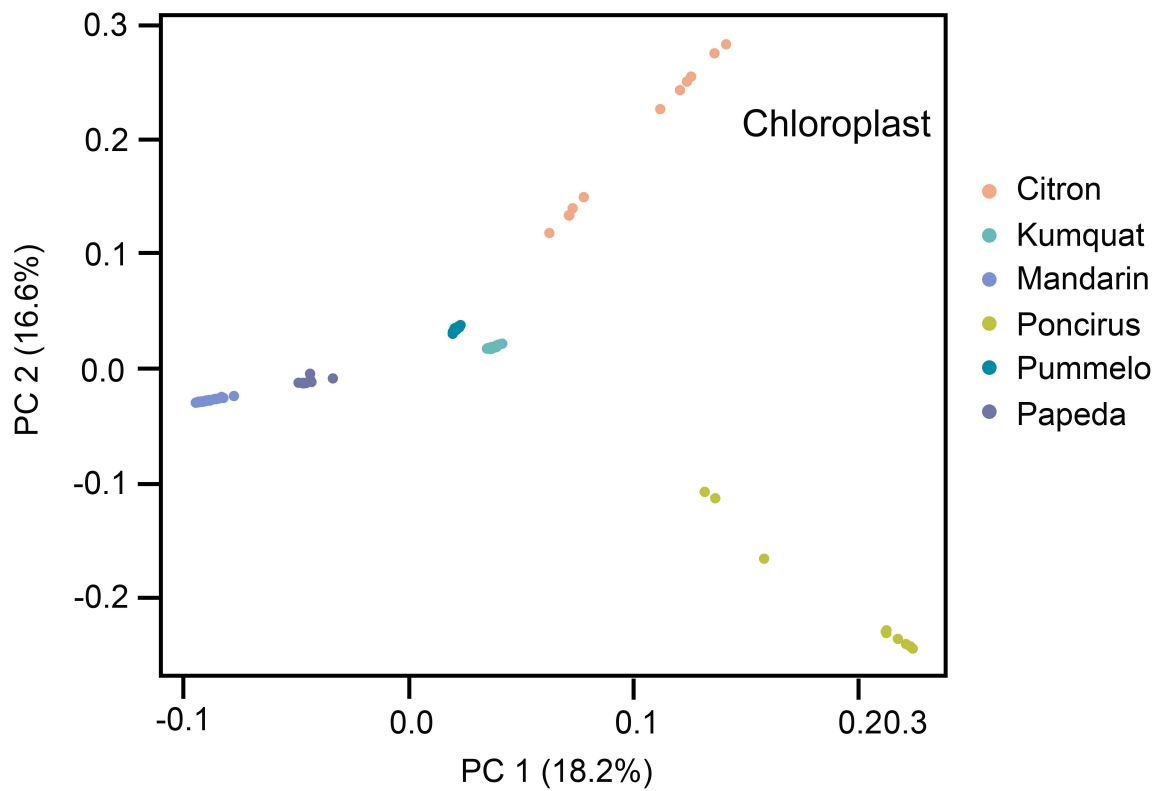

**Supplementary Fig. 13. The principal components analysis (PCA) using the chloroplast genomic dataset.** The PC1 and PC2 components estimated from chloroplast genomes in six species population were shown. And the hybrid populations were excluded.

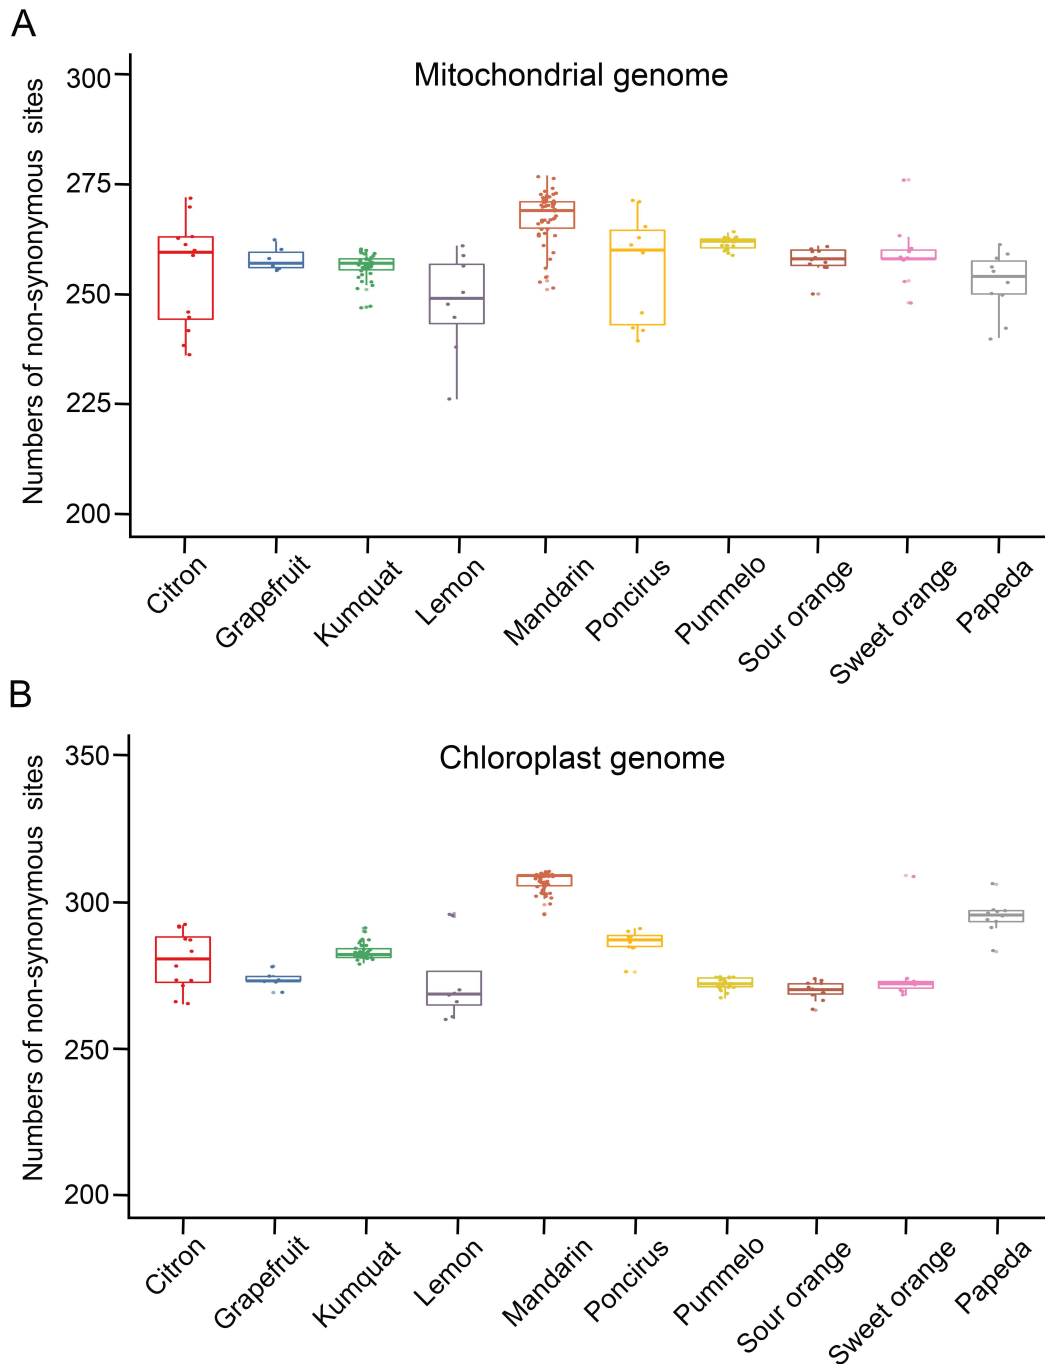

**Supplementary Fig. 14. The genetic load estimation in mitochondrial and chloroplast genomes.** (A) The number of predicted nonsynonymous sites in the predicted ORFs of the mitochondrial genome in ten populations including hybrid populations. (B) The prediction of genetic load in chloroplast genome. Because the cytoplasmic genomes in the hybrids were inherited from pummelo, the genetic load of hybrids was used as a negative control.



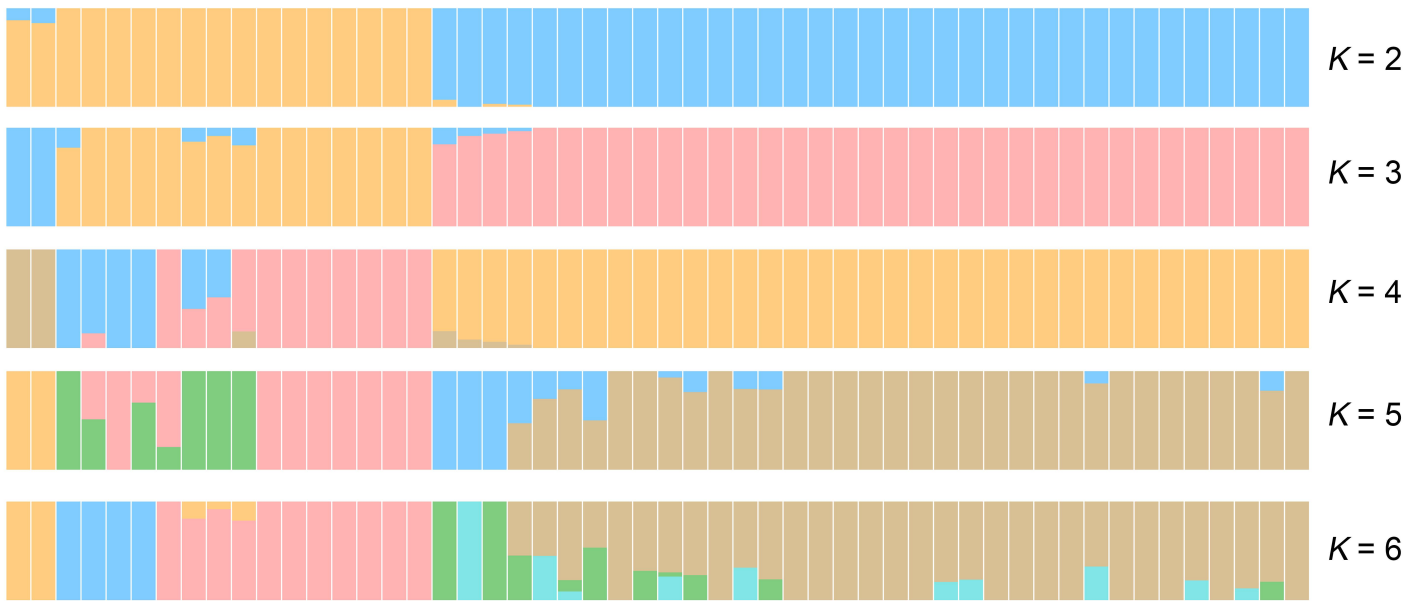

**Supplementary Fig. 15. The ancestry composition estimated by mitochondrial genomic dataset in mandarin population. The estimation from  $K = 2$  to  $K = 6$ .**

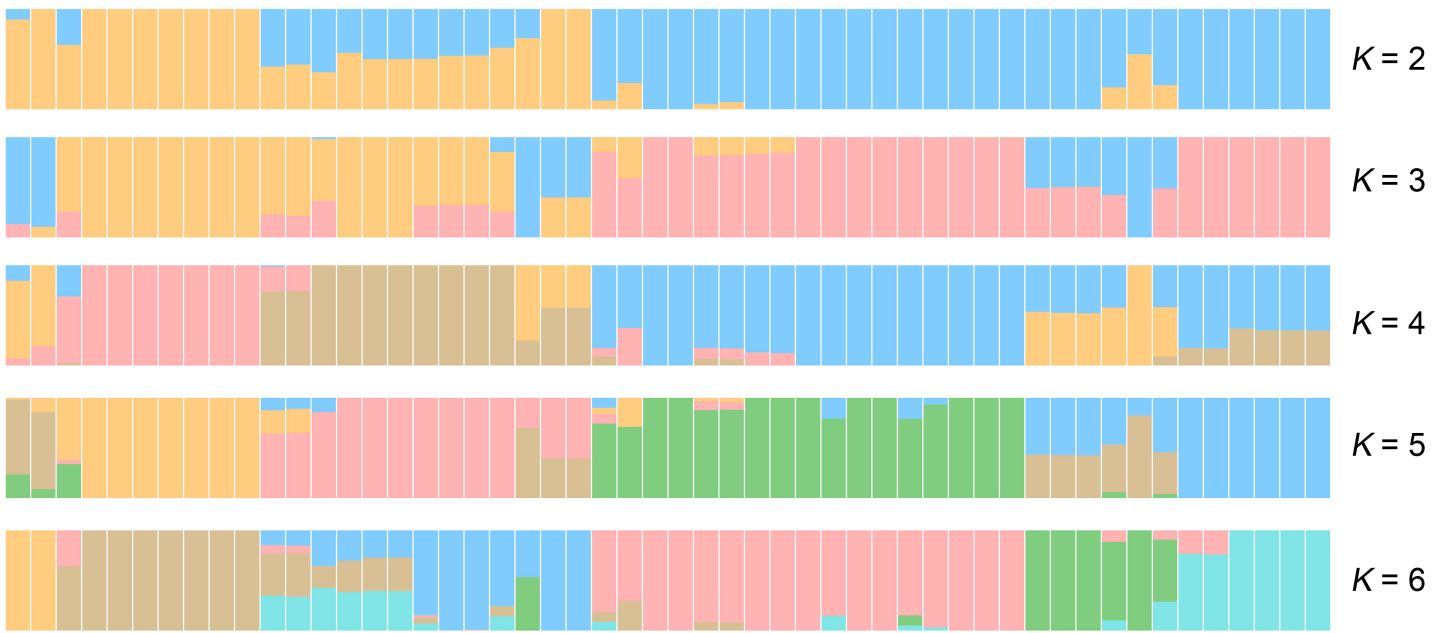

**Supplementary Fig. 16. The ancestry composition estimated by nuclear genomic dataset in mandarin population. The estimation from  $K = 2$  to  $K = 6$ .**

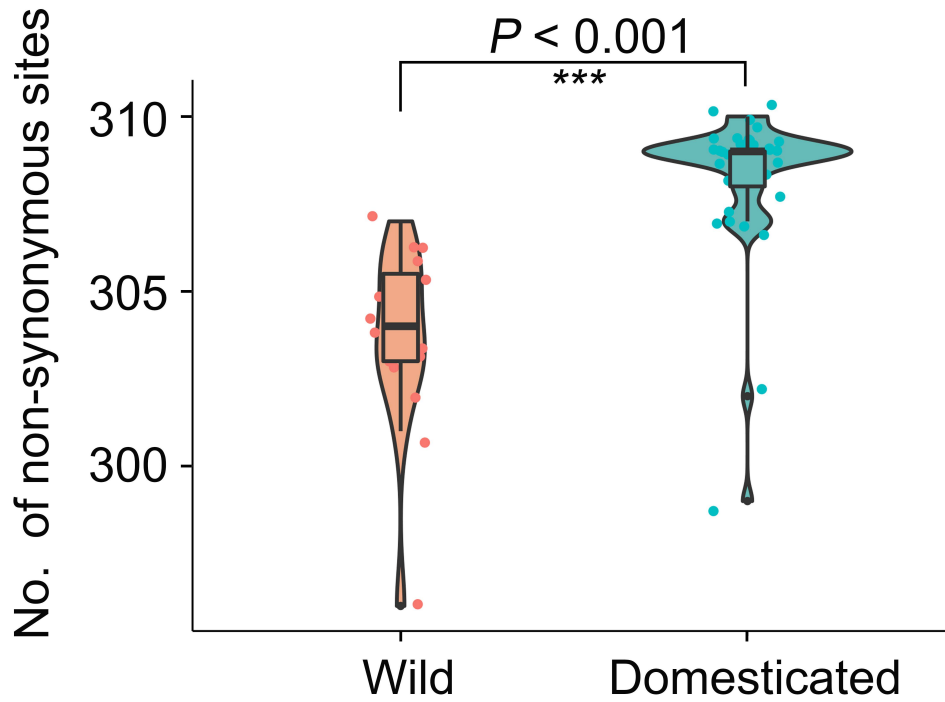

**Supplementary Fig. 17. The comparison of genetic load in the chloroplast genome between wild and domesticated mandarins.** The wild and domesticated populations was inferred from the chloroplast genomic data. The y-axis indicates the number of non-synonymous sites.

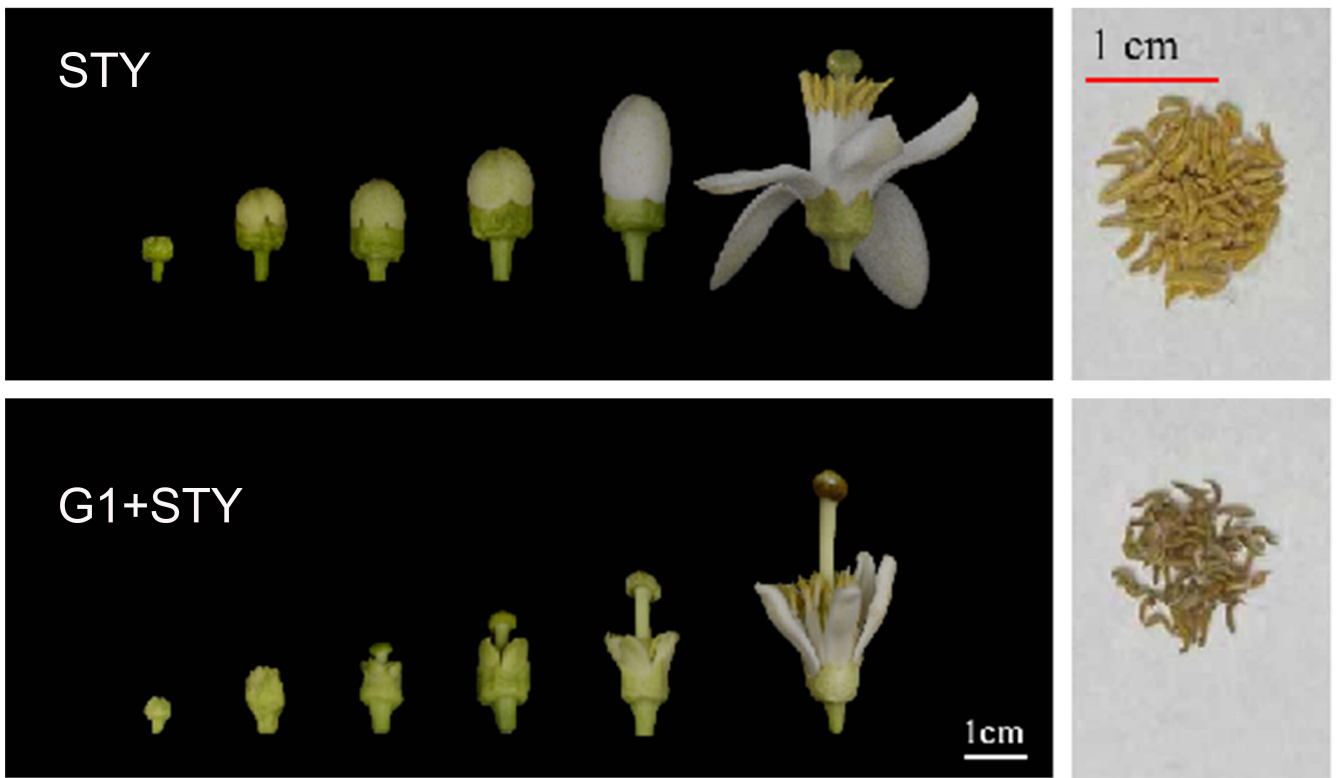

**Supplementary Fig. 18. The flowers and anthers at different developmental stages in pummelo cultivar STY and the alloplasmic line G1+STY. The abnormal development that stamens could not reach to the height of stigma could be observed in the G1+STY sample, and the collection of mature anthers showed a dehydrated state.**

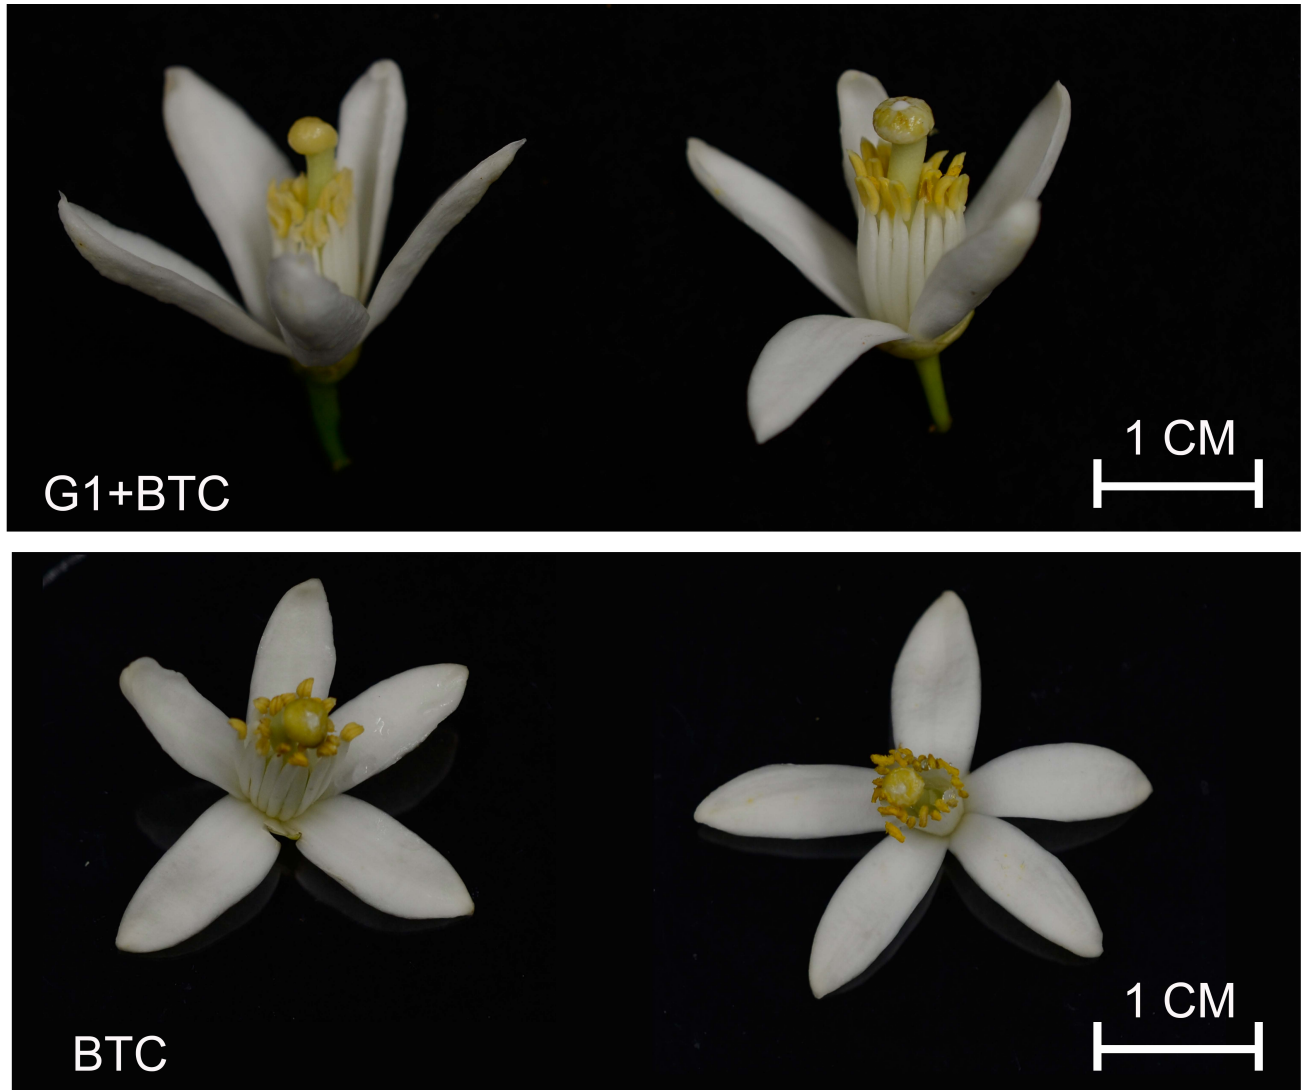

**Supplementary Fig. 19.** The flowers between the sweet orange cultivar **BTC** and the alloplasmic line **G1+BTC**. There was no difference (stamen height and mature anther status) between the flowers and anthers in the sweet orange cultivar **BTC** and the alloplasmic line **G1+BTC**.

A

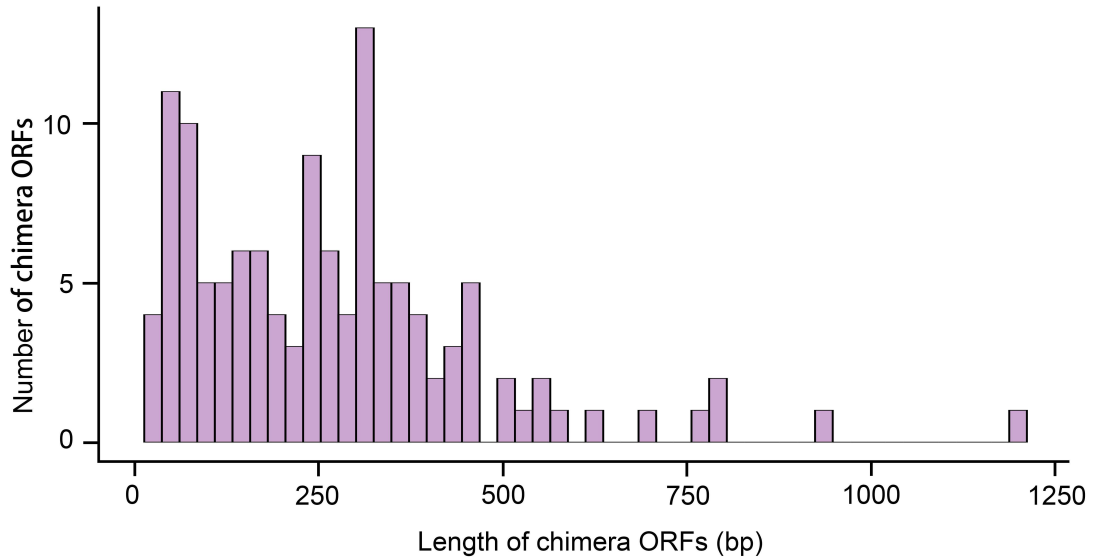

B

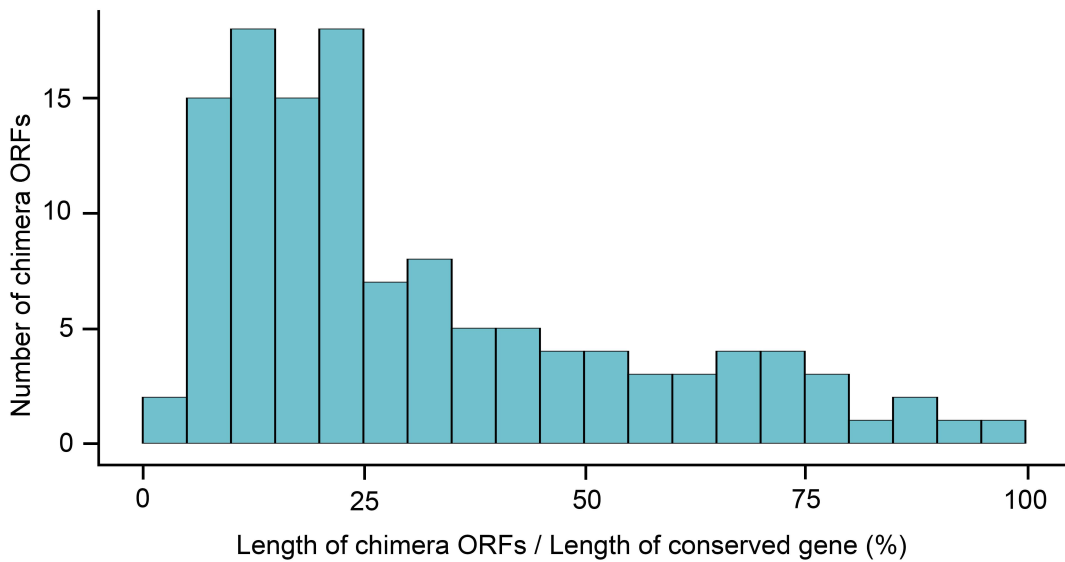

**Supplementary Fig. 20. The distribution of chimeric ORFs from conserved genes in mandarin G1 mitochondrial genome.** There are two types of chimeric ORFs in the intergenic region, including the shuffling start/stop codons and the splicing fragments. (A) The length distribution of the chimeric ORFs. The x-axis indicated the length (bins = 50), while y-axis indicated the number of ORFs. (B) The integrity ratio (length of chimeric ORFs/length of related conserved gene) distribution of the chimeric ORFs. The x-axis indicated the integrity ratio (%) (bins = 20), while y-axis indicated the number of ORFs.

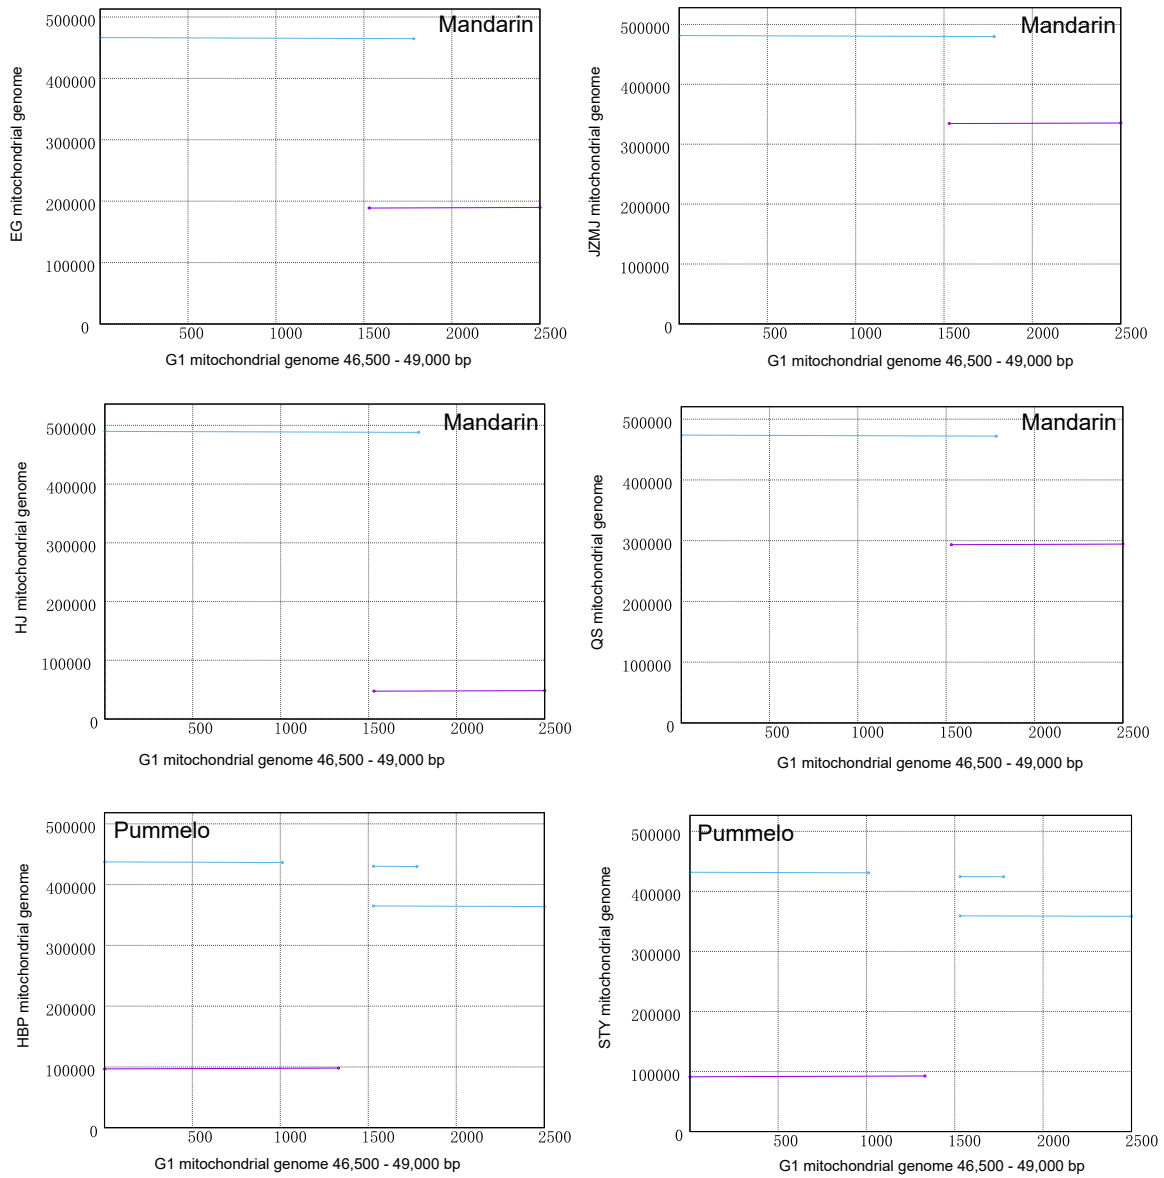

**Supplementary Fig. 21. The collinear analysis of *orf374* linked region.** The *orf374* linked region (46,500 – 49,000 bp) was aligned with the six mitochondrial genomes including four mandarins and two pummelos. The purple indicated the same direction, while blue indicated the opposite arrangements.

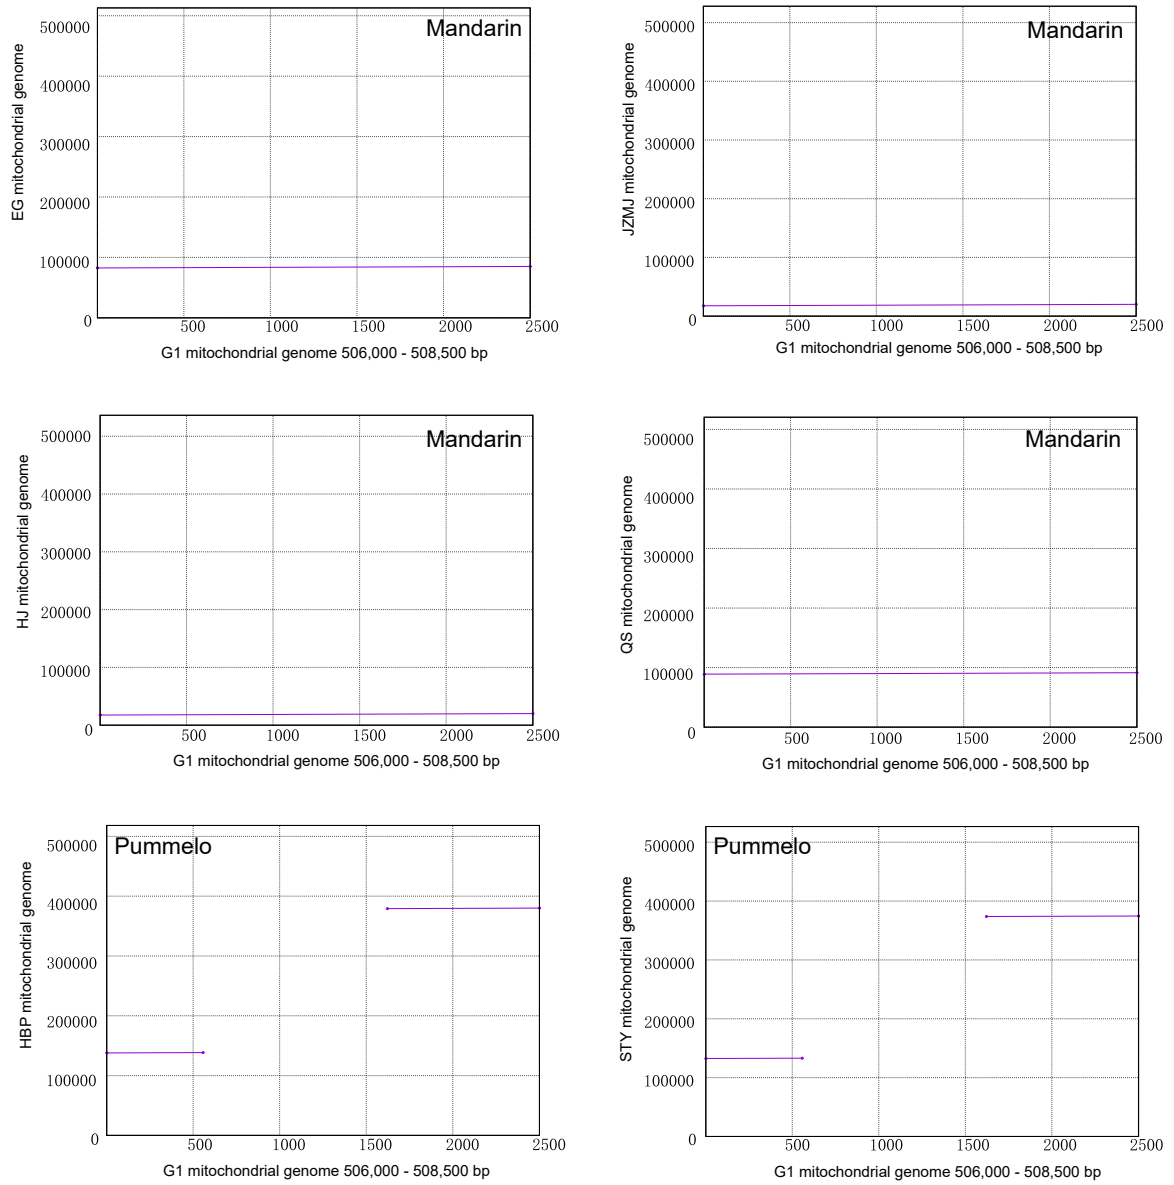

**Supplementary Fig. 22. The collinear analysis of *orf384* linked region.** The *orf384* linked region (506,000 – 508,500 bp) was aligned with the six mitochondrial genomes including four mandarins and two pummelos. The purple indicated the same direction, while blue indicated the opposite arrangements.



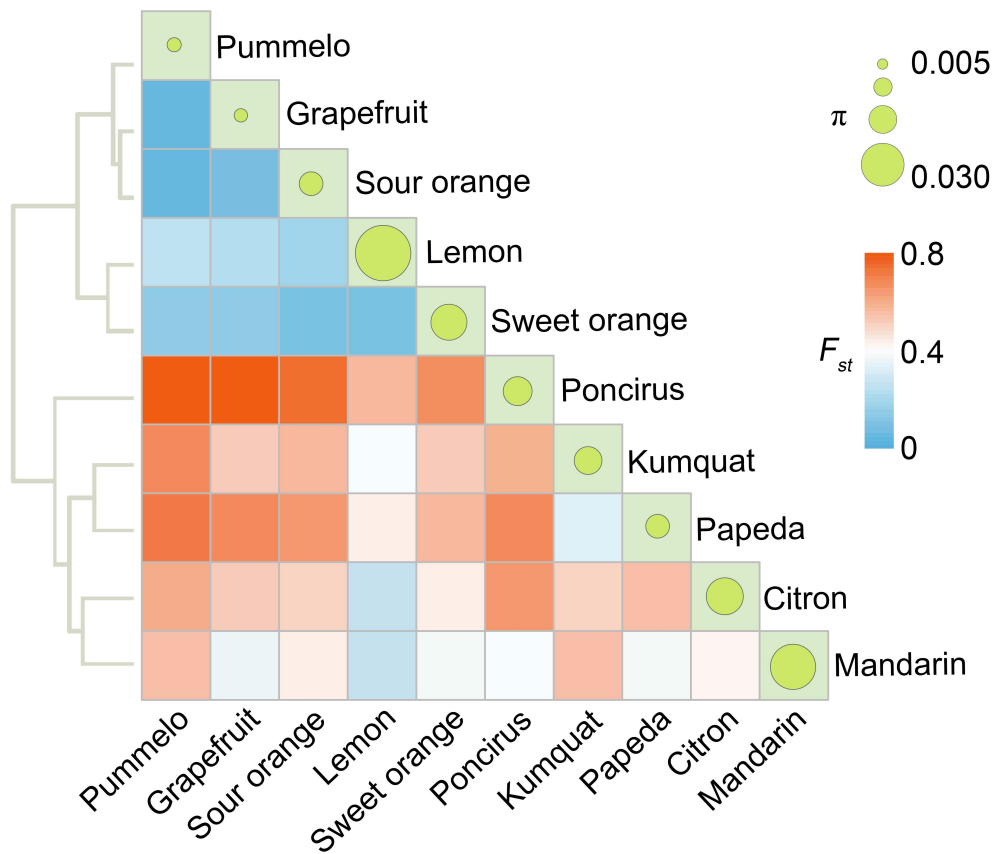

**Supplementary Fig. 23. The genetic differentiation in ten populations.** The differentiation was estimated by paired  $F_{st}$  statistic and ten populations (including the four hybrid populations) were clustered based on  $F_{st}$  value. The size of circle presented the genetic diversity ( $\pi$ ) value.



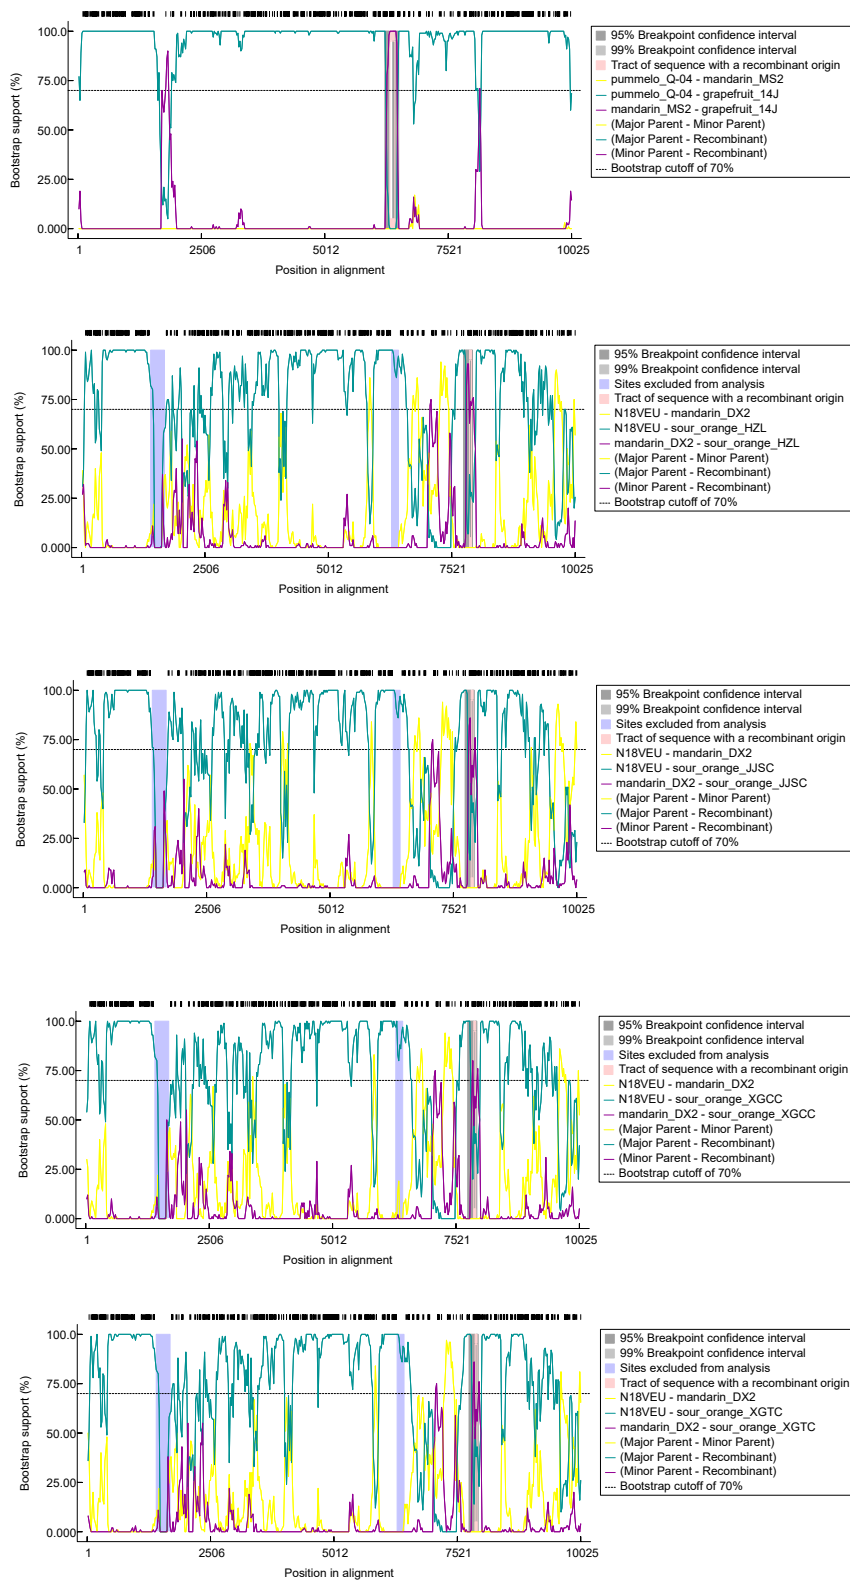

**Supplementary Fig. 25. The recombination detected by RDP5.** The potential recombination signals (regions) in five samples from grapefruit and sour orange (grapefruit 14J; sour oranges HZL, JJSC, XGCC and XGTC).

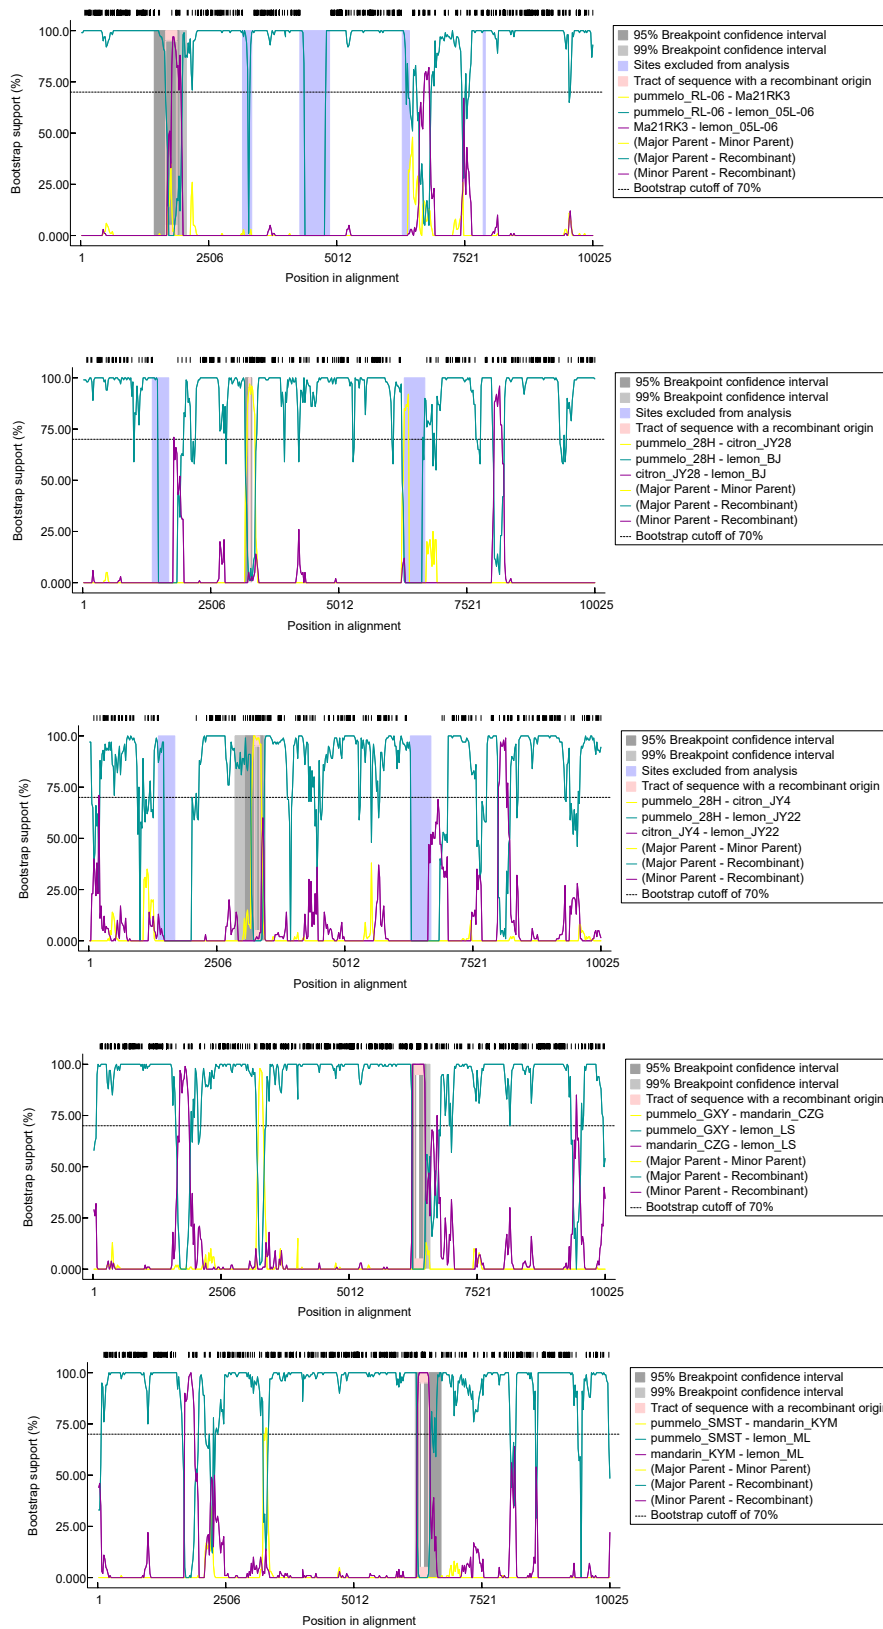

**Supplementary Fig. 26. The recombination detected by RDP5. The potential recombination signals (regions) in five lemons (05L-06, BJ, JY22, LS and ML).**

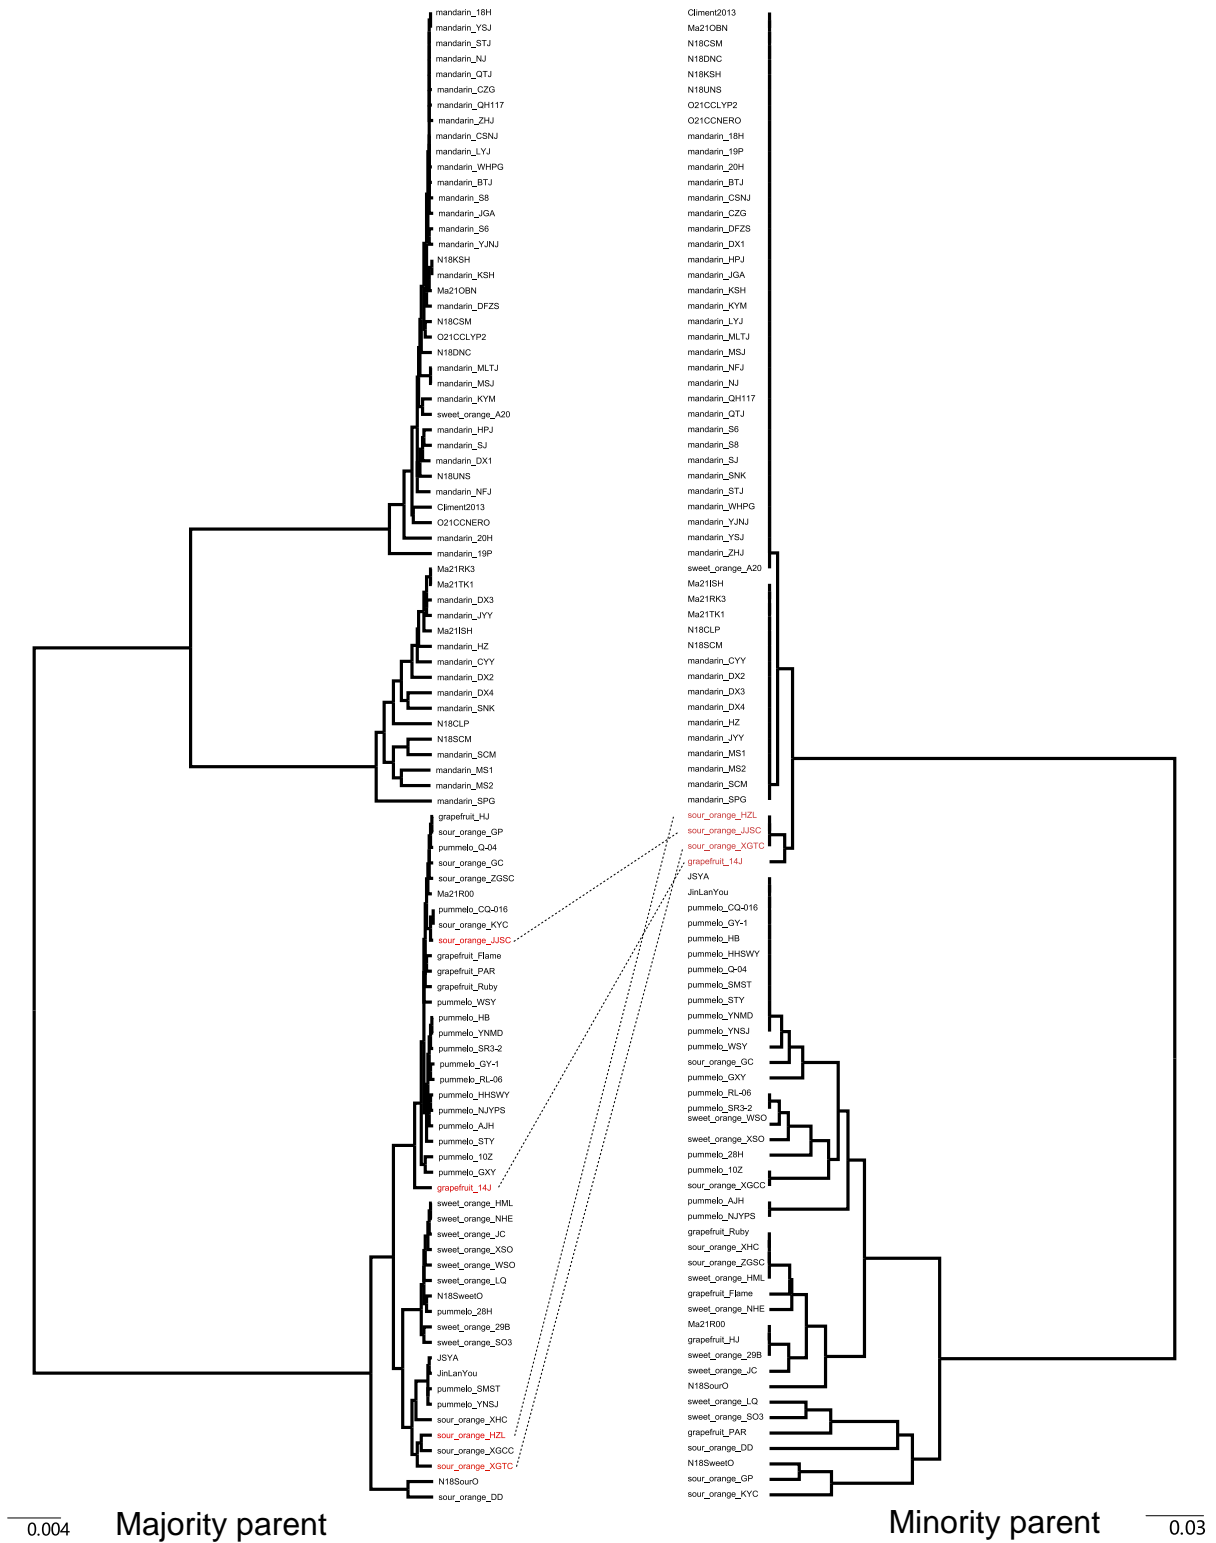

**Supplementary Fig. 27. The Maximum Likelihood (ML) phylogeny between the major parent regions and the minor parent regions. The identical topological clade (subgroup1) was connected by dashed line.**

**Block 1**

```

2160 2170 2180 2190 2200 2210 2220 2230 2240 2250 2260 2270 2280 2290 2300 2310 2320
J5YA CTTTACCCACCCGGGGGGGAGCAGGGCCACGGTATTAAAG GC GTC CA CCC GAGCAACGG TCGCGTAAATGCCCCGGTCTGTCCG CCGA AGAAC TGGGGCTTAACAAACACATCTTAGGGGACAGATATTGGTTAGATAAGTGAGCCG
grapefruit 14J CTTTACCCACCCGGGGGGGAGCAGGGCCACGGTATTAAAG GC GTC CA CCC GAGCAACGG TCGCGTAAATGCCCCGGTCTGTCCG CCGA AGAAC TGGGGCTTAACAAACACATCTTAGGGGACAGATATTGGTTAGATAAGTGAGCCG
grapefruit Flame CTTTACCCACCCGGGGGGGAGCAGGGCCACGGTATTAAAG GC GTC CA CCC GAGCAACGG TCGCGTAAATGCCCCGGTCTGTCCG CCGA AGAAC TGGGGCTTAACAAACACATCTTAGGGGACAGATATTGGTTAGATAAGTGAGCCG
grapefruit HJ CTTTACCCACCCGGGGGGGAGCAGGGCCACGGTATTAAAG GC GTC CA CCC GAGCAACGG TCGCGTAAATGCCCCGGTCTGTCCG CCGA AGAAC TGGGGCTTAACAAACACATCTTAGGGGACAGATATTGGTTAGATAAGTGAGCCG
grapefruit FAR CTTTACCCACCCGGGGGGGAGCAGGGCCACGGTATTAAAG GC GTC CA CCC GAGCAACGG TCGCGTAAATGCCCCGGTCTGTCCG CCGA AGAAC TGGGGCTTAACAAACACATCTTAGGGGACAGATATTGGTTAGATAAGTGAGCCG
grapefruit Ruby CTTTACCCACCCGGGGGGGAGCAGGGCCACGGTATTAAAG GC GTC CA CCC GAGCAACGG TCGCGTAAATGCCCCGGTCTGTCCG CCGA AGAAC TGGGGCTTAACAAACACATCTTAGGGGACAGATATTGGTTAGATAAGTGAGCCG
mandarin DX1 CTTTACCCACCCGGGGGGGAGCAGGGCCACGGTATTAAAG GC GTC CA CCC GAGCAACGG TCGCGTAAATGCCCCGGTCTGTCCG CCGA AGAAC TGGGGCTTAACAAACACATCTTAGGGGACAGATATTGGTTAGATAAGTGAGCCG
sour orange DD CTTTACCCACCCGGGGGGGAGCAGGGCCACGGTATTAAAG GC GTC CA CCC GAGCAACGG TCGCGTAAATGCCCCGGTCTGTCCG CCGA AGAAC TGGGGCTTAACAAACACATCTTAGGGGACAGATATTGGTTAGATAAGTGAGCCG
sour orange GC CTTTACCCACCCGGGGGGGAGCAGGGCCACGGTATTAAAG GC GTC CA CCC GAGCAACGG TCGCGTAAATGCCCCGGTCTGTCCG CCGA AGAAC TGGGGCTTAACAAACACATCTTAGGGGACAGATATTGGTTAGATAAGTGAGCCG
sour orange H2L CTTTACCCACCCGGGGGGGAGCAGGGCCACGGTATTAAAG GC GTC CA CCC GAGCAACGG TCGCGTAAATGCCCCGGTCTGTCCG CCGA AGAAC TGGGGCTTAACAAACACATCTTAGGGGACAGATATTGGTTAGATAAGTGAGCCG
sour orange J28C CTTTACCCACCCGGGGGGGAGCAGGGCCACGGTATTAAAG GC GTC CA CCC GAGCAACGG TCGCGTAAATGCCCCGGTCTGTCCG CCGA AGAAC TGGGGCTTAACAAACACATCTTAGGGGACAGATATTGGTTAGATAAGTGAGCCG
sour orange KYC CTTTACCCACCCGGGGGGGAGCAGGGCCACGGTATTAAAG GC GTC CA CCC GAGCAACGG TCGCGTAAATGCCCCGGTCTGTCCG CCGA AGAAC TGGGGCTTAACAAACACATCTTAGGGGACAGATATTGGTTAGATAAGTGAGCCG
sour orange X2CC CTTTACCCACCCGGGGGGGAGCAGGGCCACGGTATTAAAG GC GTC CA CCC GAGCAACGG TCGCGTAAATGCCCCGGTCTGTCCG CCGA AGAAC TGGGGCTTAACAAACACATCTTAGGGGACAGATATTGGTTAGATAAGTGAGCCG
sour orange XHC CTTTACCCACCCGGGGGGGAGCAGGGCCACGGTATTAAAG GC GTC CA CCC GAGCAACGG TCGCGTAAATGCCCCGGTCTGTCCG CCGA AGAAC TGGGGCTTAACAAACACATCTTAGGGGACAGATATTGGTTAGATAAGTGAGCCG
sour orange 268C CTTTACCCACCCGGGGGGGAGCAGGGCCACGGTATTAAAG GC GTC CA CCC GAGCAACGG TCGCGTAAATGCCCCGGTCTGTCCG CCGA AGAAC TGGGGCTTAACAAACACATCTTAGGGGACAGATATTGGTTAGATAAGTGAGCCG
sweet orange 29B CTTTACCCACCCGGGGGGGAGCAGGGCCACGGTATTAAAG GC GTC CA CCC GAGCAACGG TCGCGTAAATGCCCCGGTCTGTCCG CCGA AGAAC TGGGGCTTAACAAACACATCTTAGGGGACAGATATTGGTTAGATAAGTGAGCCG
sweet orange A20 CTTTACCCACCCGGGGGGGAGCAGGGCCACGGTATTAAAG GC GTC CA CCC GAGCAACGG TCGCGTAAATGCCCCGGTCTGTCCG CCGA AGAAC TGGGGCTTAACAAACACATCTTAGGGGACAGATATTGGTTAGATAAGTGAGCCG
sweet orange HML CTTTACCCACCCGGGGGGGAGCAGGGCCACGGTATTAAAG GC GTC CA CCC GAGCAACGG TCGCGTAAATGCCCCGGTCTGTCCG CCGA AGAAC TGGGGCTTAACAAACACATCTTAGGGGACAGATATTGGTTAGATAAGTGAGCCG
sweet orange J0 CTTTACCCACCCGGGGGGGAGCAGGGCCACGGTATTAAAG GC GTC CA CCC GAGCAACGG TCGCGTAAATGCCCCGGTCTGTCCG CCGA AGAAC TGGGGCTTAACAAACACATCTTAGGGGACAGATATTGGTTAGATAAGTGAGCCG
sweet orange LQ CTTTACCCACCCGGGGGGGAGCAGGGCCACGGTATTAAAG GC GTC CA CCC GAGCAACGG TCGCGTAAATGCCCCGGTCTGTCCG CCGA AGAAC TGGGGCTTAACAAACACATCTTAGGGGACAGATATTGGTTAGATAAGTGAGCCG
sweet orange NHE CTTTACCCACCCGGGGGGGAGCAGGGCCACGGTATTAAAG GC GTC CA CCC GAGCAACGG TCGCGTAAATGCCCCGGTCTGTCCG CCGA AGAAC TGGGGCTTAACAAACACATCTTAGGGGACAGATATTGGTTAGATAAGTGAGCCG
sweet orange 803 CTTTACCCACCCGGGGGGGAGCAGGGCCACGGTATTAAAG GC GTC CA CCC GAGCAACGG TCGCGTAAATGCCCCGGTCTGTCCG CCGA AGAAC TGGGGCTTAACAAACACATCTTAGGGGACAGATATTGGTTAGATAAGTGAGCCG
sweet orange W50 CTTTACCCACCCGGGGGGGAGCAGGGCCACGGTATTAAAG GC GTC CA CCC GAGCAACGG TCGCGTAAATGCCCCGGTCTGTCCG CCGA AGAAC TGGGGCTTAACAAACACATCTTAGGGGACAGATATTGGTTAGATAAGTGAGCCG
sweet_orange_X50 CTTTACCCACCCGGGGGGGAGCAGGGCCACGGTATTAAAG GC GTC CA CCC GAGCAACGG TCGCGTAAATGCCCCGGTCTGTCCG CCGA AGAAC TGGGGCTTAACAAACACATCTTAGGGGACAGATATTGGTTAGATAAGTGAGCCG

```

**Block 2**

```

6350 6360 6370 6380 6390 6400 6410 6420 6430 6440 6450 6460 6470 6480 6490 6500
J5YA CT GAGCACTTAG AG T GCGGAGCCCTCC CATGA GATAT TGA GA GGGG TTT GCGGCGGAGGAGGAGTGTGAACGCTATT
grapefruit 14J CC T T GGGGAC T AGACTT T C AC GGGTGTAGGGGG G TGGCCCGCCCG C CCGTGGGGGGGTAGG CCGCCCGGGTAGAT CCGGTTCCCGAGG GCGGT GGGGCGAGGGAGTGTGAACGCTATT
grapefruit Flame CT ACA T TT TGGAGTAG CT AGCC TT T C CAT CATA T GAG GG GTT T C G GGGGGGATG C CCGCGGGTAGAGTT G C C C TGGCT G GGGCGAGGGAGTGTGAACGCTATT
grapefruit HJ CT ACA T TT TGGAGTAG CT AGCC TT T C CAT AC ATA GAG GGG GTT T C G GGGGGGATG C CCGCGGGTAGAGTT G C C C TGGCT G GGGCGAGGGAGTGTGAACGCTATT
grapefruit FAR TT GGG GC TA TGGAGT G CT AGCC TT T C CAT ACA TAGT GAG GGGG GTT T C G GGGGGGATG C CCGCGGGTAGAGTT G C C C TGGCT G GGGCGAGGGAGTGTGAACGCTATT
grapefruit Ruby TT ACA G TT TGGAGTAG CT AGCC TT T C CAT ACATA T GAG GG GTT T C G GGGGGGATG C CCGCGGGTAGAGTT G C C C TGGCT G GGGCGAGGGAGTGTGAACGCTATT
mandarin DX1 CCGGGGCTTAGAGGGAG TGT AGCC TT T C CCGGATACACAGT GAGGGGGG GTT CCGCCCGCCCGAGGGC TCGGGGGGTAG GAGCCCGCCGGT GAGTGTCCCGGAGG GCGTGTGGAGGTT TGGCGAGGGAGTGTGAACGCTATT
sour orange DD TT AGG G TT TGG G G C AGCC TT T C CAT CATA T GCA GGG G T T CCGTCCCGAGG GT GGGC C GGGAGTGT GT AACGCTATT
sour orange GC CT ACA T TT TGGAGTAG CT AGCC TT T C CAT AC ATA GAG GGG GTT T C G GGGGGGATG C CCGCGGGTAGAGTT G C C C TGGCT G GGGCGAGGGAGTGTGAACGCTATT
sour orange H2L CCGT TAT T TG C CG GG AG CTTT C T AC ATA GAG G GC TTT GAGGCGCTCG CCG GGGCGAGGGAGTGTGAACGCTATT
sour orange J28C CCGT TAT T TG C CG GG AG CTTT C T AC ATA GAG G GC TTT GAGGCGCTCG CCG GGGCGAGGGAGTGTGAACGCTATT
sour orange KYC CCGT TAT T TG C CG GG AG CTTT C T AC ATA GAG G GC TTT GAGGCGCTCG CCG GGGCGAGGGAGTGTGAACGCTATT
sour orange X2CC CCGT TAT T TG C CG GG AG CTTT C T AC ATA GAG G GC TTT GAGGCGCTCG CCG GGGCGAGGGAGTGTGAACGCTATT
sour orange XHC CCGT TAT T TG C CG GG AG CTTT C T AC ATA GAG G GC TTT GAGGCGCTCG CCG GGGCGAGGGAGTGTGAACGCTATT
sour orange 268C CCGT TAT T TG C CG GG AG CTTT C T AC ATA GAG G GC TTT GAGGCGCTCG CCG GGGCGAGGGAGTGTGAACGCTATT
sweet orange 29B TT ACA G TT TGGAGTAG CT AGCC TT T C CAT AC ATA TTAG GG GTT T C G GGGGGGATG C CCGCGGGTAGAGTT G C C C TGGCT G GGGCGAGGGAGTGTGAACGCTATT
sweet orange A20 CCGGGGCTTAGAGGGAG TGT AGCC TT T C CCGGATACACAGT GAGGGGGG GTT CCGCCCGCCCGAGGGC TCGGGGGGTAG GAGCCCGCCGGT GAGTGTCCCGGAGG GCGTGTGGAGGTT TGGCGAGGGAGTGTGAACGCTATT
sweet orange HML CT ACA G TT TGGAGTAG CT AGCC TT T C CAT AC ATA GAG GGG GTT T C G GGGGGGATG C CCGCGGGTAGAGTT G C C C TGGCT G GGGCGAGGGAGTGTGAACGCTATT
sweet orange J0 CT ACA G TT TGGAGTAG CT AGCC TT T C CAT AC ATA GAG GGG GTT T C G GGGGGGATG C CCGCGGGTAGAGTT G C C C TGGCT G GGGCGAGGGAGTGTGAACGCTATT
sweet orange LQ CT ACA G TT TGGAGTAG CT AGCC TT T C CAT AC ATA GAG GGG GTT T C G GGGGGGATG C CCGCGGGTAGAGTT G C C C TGGCT G GGGCGAGGGAGTGTGAACGCTATT
sweet orange NHE CT ACA G TT TGGAGTAG CT AGCC TT T C CAT AC ATA GAG GGG GTT T C G GGGGGGATG C CCGCGGGTAGAGTT G C C C TGGCT G GGGCGAGGGAGTGTGAACGCTATT
sweet orange 803 CT ACA G TT TGGAGTAG CT AGCC TT T C CAT AC ATA GAG GGG GTT T C G GGGGGGATG C CCGCGGGTAGAGTT G C C C TGGCT G GGGCGAGGGAGTGTGAACGCTATT
sweet orange W50 CT ACA G TT TGGAGTAG CT AGCC TT T C CAT AC ATA GAG GGG GTT T C G GGGGGGATG C CCGCGGGTAGAGTT G C C C TGGCT G GGGCGAGGGAGTGTGAACGCTATT
sweet_orange_X50 CT ACA G TT TGGAGTAG CT AGCC TT T C CAT AC ATA GAG GGG GTT T C G GGGGGGATG C CCGCGGGTAGAGTT G C C C TGGCT G GGGCGAGGGAGTGTGAACGCTATT

```

**Block 3**

```

8040 8050 8060 8070 8080 8090 8100 8110 8120 8130 8140 8150 8160 8170 8180 8190 8200 8210 8220
J5YA TTACGAATCCCAACCCGAGGGATAGACCTAAATTA G TTAACCTATGG AAC C GT AATAAGAT C G G G AGT C ATATGTTGTTATTACTGTGGGATTAACCGGGGTT
grapefruit 14J TTACGAATCCCAACCCGAGGGATAGACCTAAATTA G TTAACCTATGG AAC CA TATGTTAAAG G CCCCCG G G GC ATTG CCGCGG AGT TAA TGGTGTATTAATCTGTGGCATTAACCGGGGTT
grapefruit Flame TTACGAATCCCAACCCGAGGGATAGACCTAAATTA G TTAACCTATGG AAC C TATGTTAAAG G CCCCCG G G GC ATTG CCGCGG AGT TAA TGGTGTATTAATCTGTGGCATTAACCGGGGTT
grapefruit HJ TTACGAATCCCAACCCGAGGGATAGACCTAAATTA G TTAACCTATGG AAC C AAT G CC G GA G AGT C ATATGTTGTTATTACTGTGGGATTAACCGGGGTT
grapefruit FAR TTACGAATCCCAACCCGAGGGATAGACCTAAATTA G TTAACCTATGG AAC C AT GG CC GA GSA AGT C ACA TGTGTTATTAATCTGTGGGATTAACCGGGGTT
grapefruit Ruby TTACGAATCCCAACCCGAGGGATAGACCTAAATTA G TTAACCTATGG AAC C AT GG C GA GSA AGT C ACA TGTGTTATTAATCTGTGGGATTAACCGGGGTT
mandarin DX1 TTAAACATCCCAACCCGAGGGATAGACCTAAATTA G TTAACCTATGG AAC C AAT G C GATG AGT AATATGTTGTTATTACTGTGGGATTAACCGGGGTT
sour orange DD TTACGAATCCCAACCCGAGGGATAGACCTAAATTA G TTAACCTATGG AAC C AATGG C CC TGA GSA GC TATGGG C C AGT C AT T TTTGTTATTAATCTGTGGGATTAACCGGGGTT
sour orange GC TTACGAATCCCAACCCGAGGGATAGACCTAAATTA G TTAACCTATGG AAC C AAT G C G G AGT C ATATGTTGTTATTACTGTGGGATTAACCGGGGTT
sour orange H2L TTACGAATCCCAACCCGAGGGATAGACCTAAATTA G TTAACCTATGG AAC C AAT C GATG AGT AATATGTTGTTATTACTGTGGGATTAACCGGGGTT
sour orange J28C TTACGAATCCCAACCCGAGGGATAGACCTAAATTA G TTAACCTATGG AAC C TAAAC C G G G AGT C ATATGTTGTTATTACTGTGGGATTAACCGGGGTT
sour orange KYC TTACGAATCCCAACCCGAGGGATAGACCTAAATTA G TTAACCTATGG AAC C TAAAC C G G G AGT C ATATGTTGTTATTACTGTGGGATTAACCGGGGTT
sour orange X2CC TTACGAATCCCAACCCGAGGGATAGACCTAAATTA G TTAACCTATGG AAC C TAAAC C G G G AGT C ATATGTTGTTATTACTGTGGGATTAACCGGGGTT
sour orange XHC TTACGAATCCCAACCCGAGGGATAGACCTAAATTA G TTAACCTATGG AAC C TAAAC C G G G AGT C ATATGTTGTTATTACTGTGGGATTAACCGGGGTT
sour orange 268C TTACGAATCCCAACCCGAGGGATAGACCTAAATTA G TTAACCTATGG AAC C TAAAC C G G G AGT C ATATGTTGTTATTACTGTGGGATTAACCGGGGTT
sweet orange 29B TTAAACATCCCAACCCGAGGGATAGACCTAAATTA G TTAACCTATGG AAC C TAAAC C G G G AGT C ATATGTTGTTATTACTGTGGGATTAACCGGGGTT
sweet orange A20 TTAAACATCCCAACCCGAGGGATAGACCTAAATTA G TTAACCTATGG AAC C TAAAC C G G G AGT C ATATGTTGTTATTACTGTGGGATTAACCGGGGTT
sweet orange HML TTACGAATCCCAACCCGAGGGATAGACCTAAATTA G TTAACCTATGG AAC C TAAAC C G G G AGT C ATATGTTGTTATTACTGTGGGATTAACCGGGGTT
sweet orange J0 TTACGAATCCCAACCCGAGGGATAGACCTAAATTA G TTAACCTATGG AAC C TAAAC C G G G AGT C ATATGTTGTTATTACTGTGGGATTAACCGGGGTT
sweet orange LQ TTACGAATCCCAACCCGAGGGATAGACCTAAATTA G TTAACCTATGG AAC C TAAAC C G G G AGT C ATATGTTGTTATTACTGTGGGATTAACCGGGGTT
sweet orange NHE TTACGAATCCCAACCCGAGGGATAGACCTAAATTA G TTAACCTATGG AAC C TAAAC C G G G AGT C ATATGTTGTTATTACTGTGGGATTAACCGGGGTT
sweet orange 803 TTACGAATCCCAACCCGAGGGATAGACCTAAATTA G TTAACCTATGG AAC C TAAAC C G G G AGT C ATATGTTGTTATTACTGTGGGATTAACCGGGGTT
sweet orange W50 TTACGAATCCCAACCCGAGGGATAGACCTAAATTA G TTAACCTATGG AAC C TAAAC C G G G AGT C ATATGTTGTTATTACTGTGGGATTAACCGGGGTT
sweet_orange_X50 TTACGAATCCCAACCCGAGGGATAGACCTAAATTA G TTAACCTATGG AAC C TAAAC C G G G AGT C ATATGTTGTTATTACTGTGGGATTAACCGGGGTT

```

**Supplementary Fig. 28. Three recombination blocks associated with deletion/insertion variation.** Samples (subgroup1 and subgroup 2) from sour orange and grapefruit populations were plotted and five individuals with heteroplasmy through paternal leakage were highlighted with shadow.



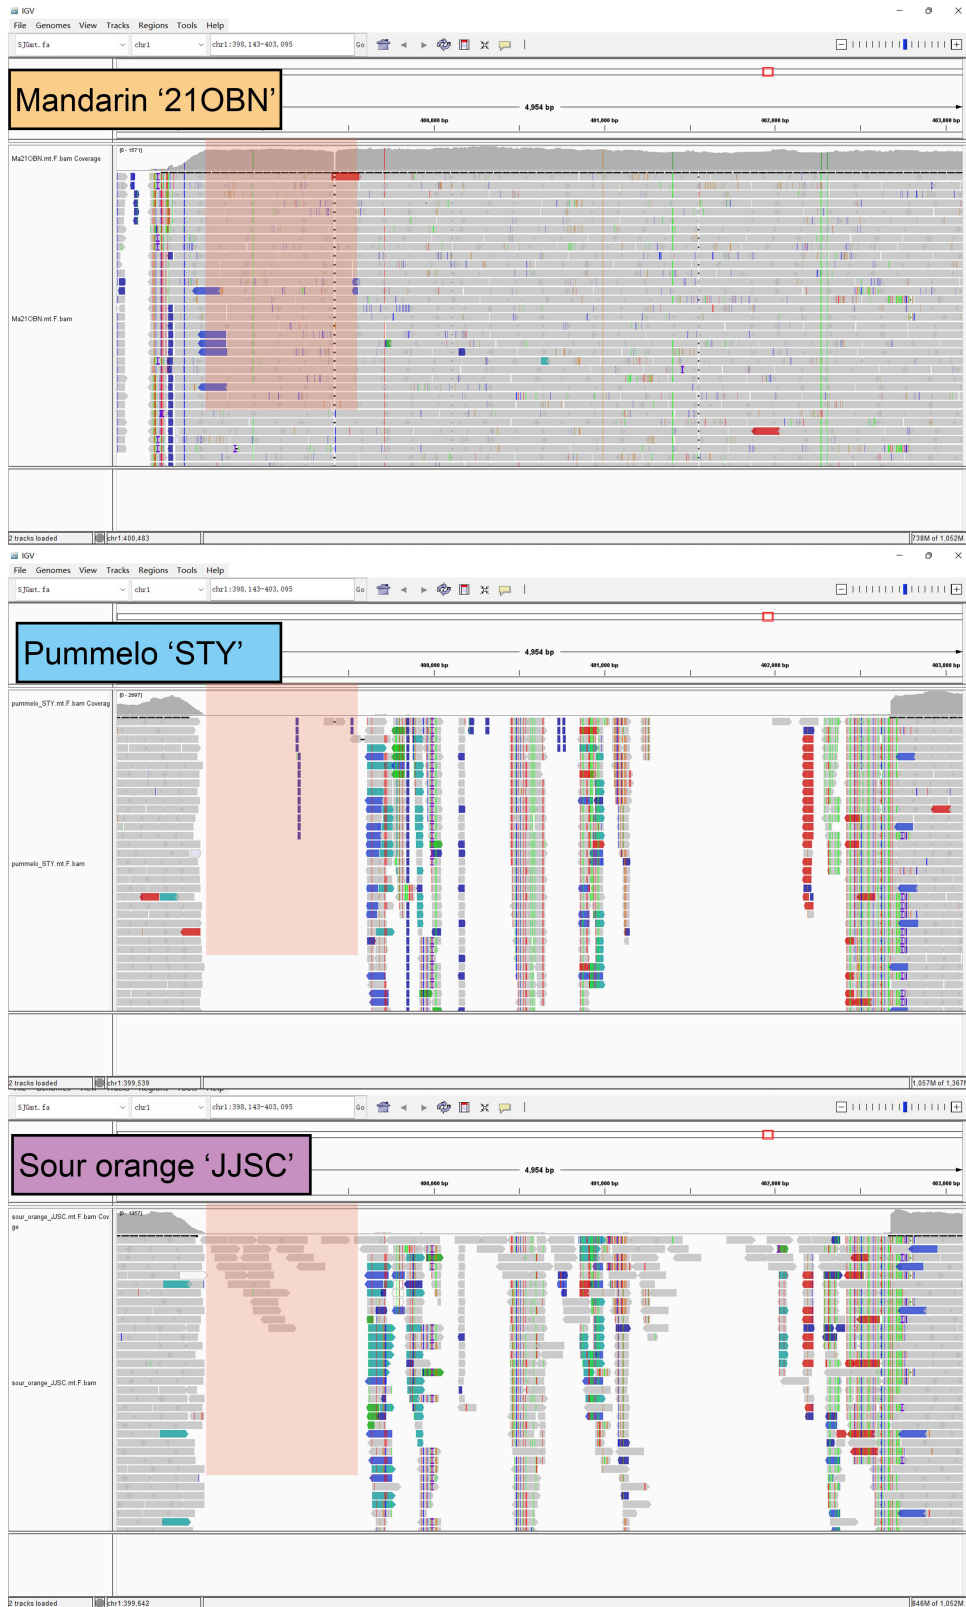

**Supplementary Fig. 29. The IGV plot of paternal leakage in sour orange JJSC (subgroup1). The deletion/insertion variation in pummelo and mandarin mitochondrial genomes was identified, with read mapping windows ranging from 398,143 to 403,095 bp. The region with apparent paternal leakage reads was highlighted.**

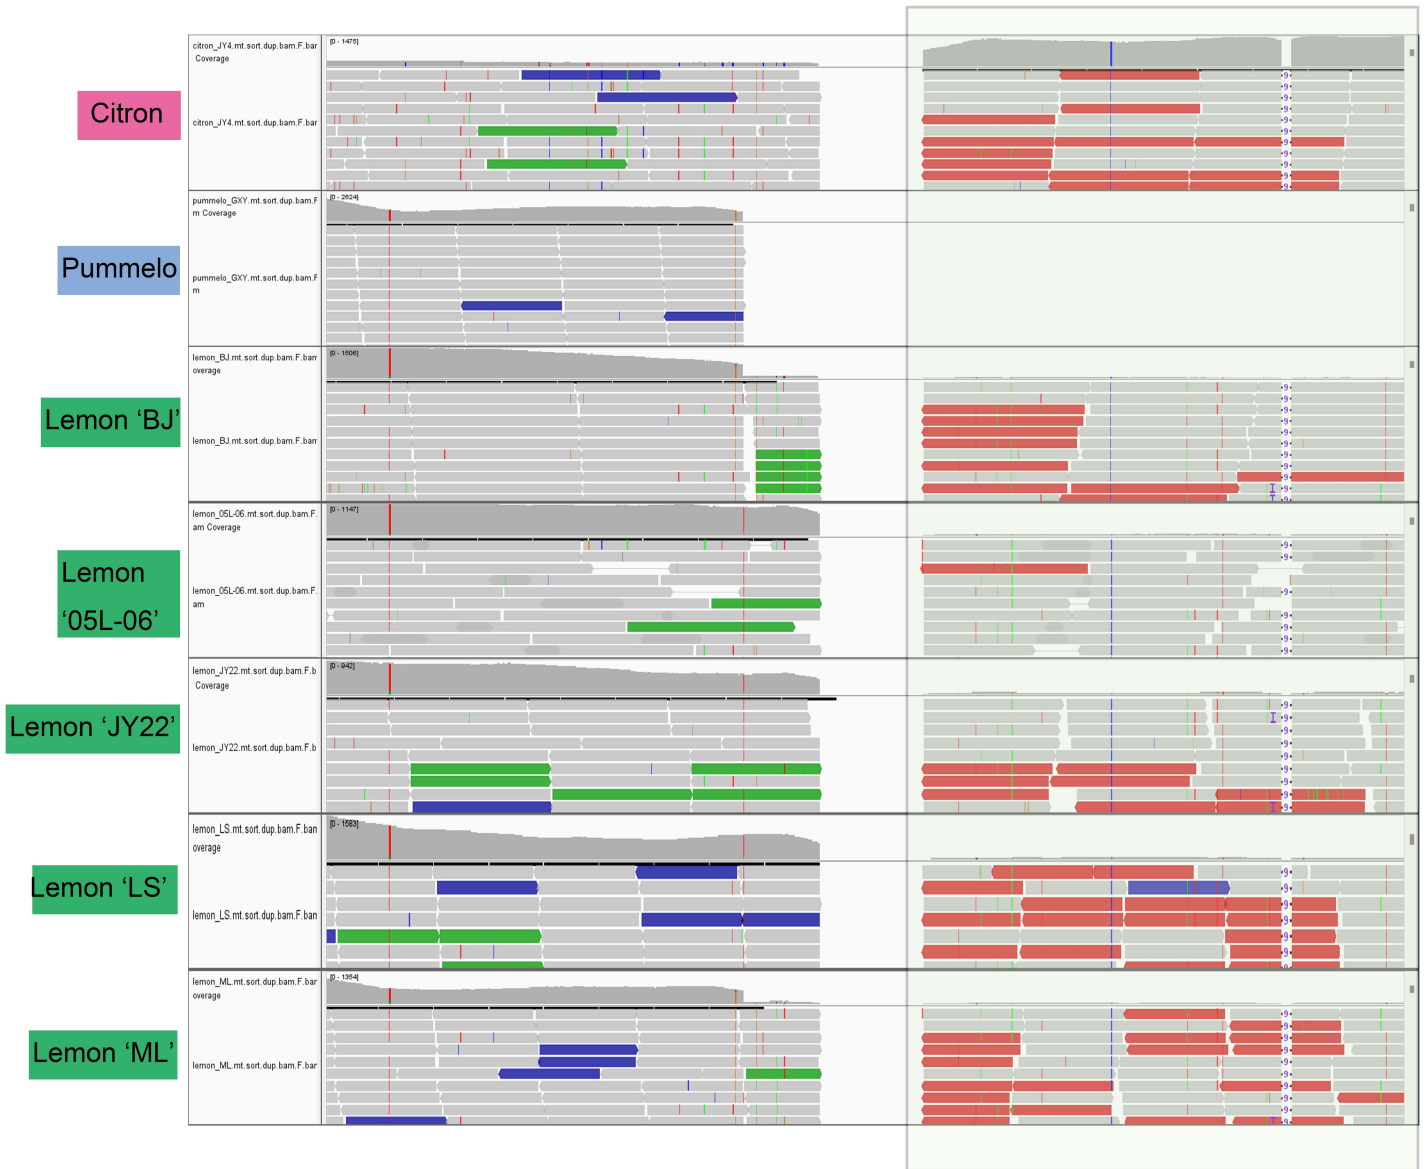

**Supplementary Fig. 30. The IGV plot of paternal leakage in lemons.** The deletion/insertion variation in pummelo and citron mitochondrial genomes was identified. The region with apparent paternal leakage reads in lemons from the citron was highlighted.



Q-Q plot of GWAS  $p_{\text{wald}}$ -values

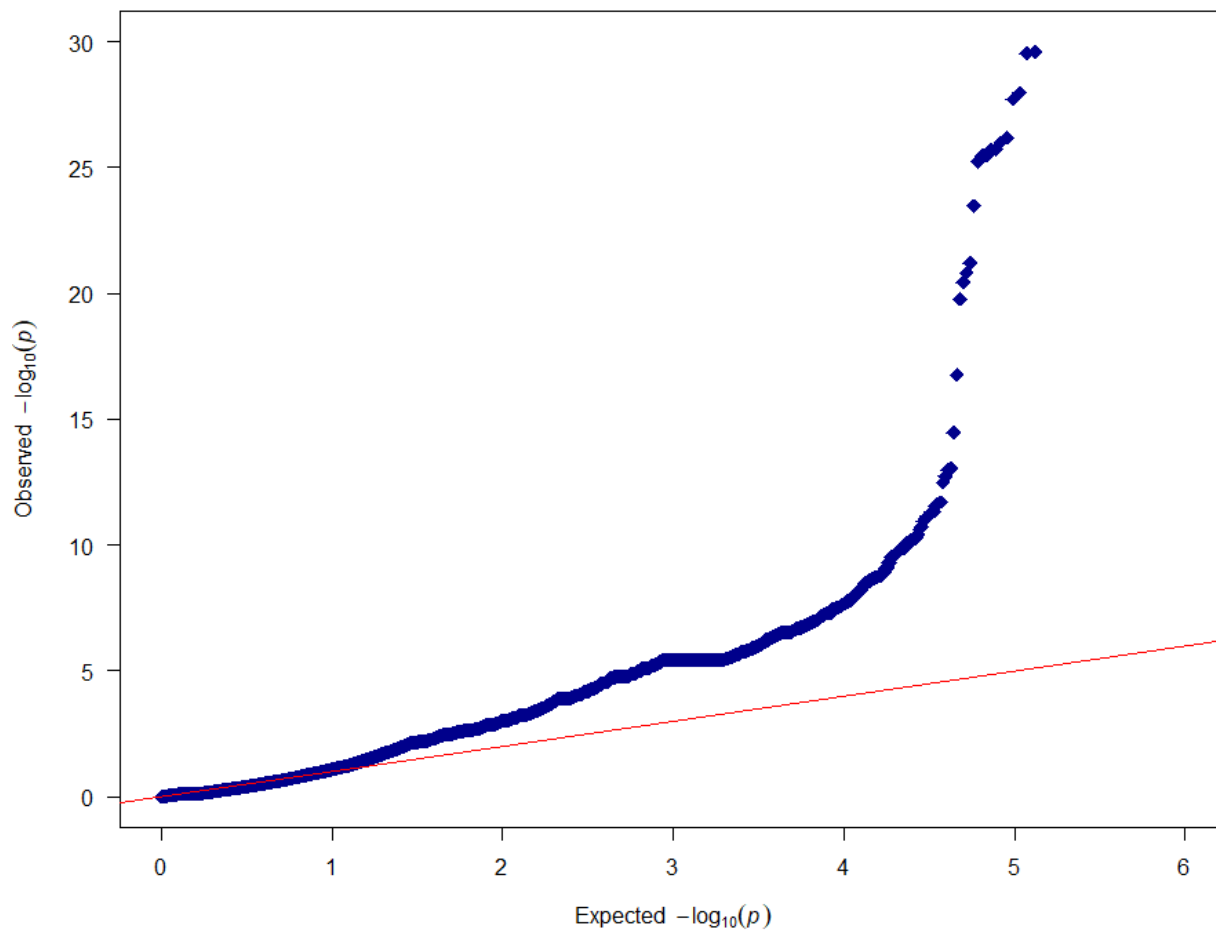

Supplementary Fig. 31. The Q-Q plot of cytoplasmic-nuclear interaction GWAS analysis ( $p_{\text{wald}}$  value).

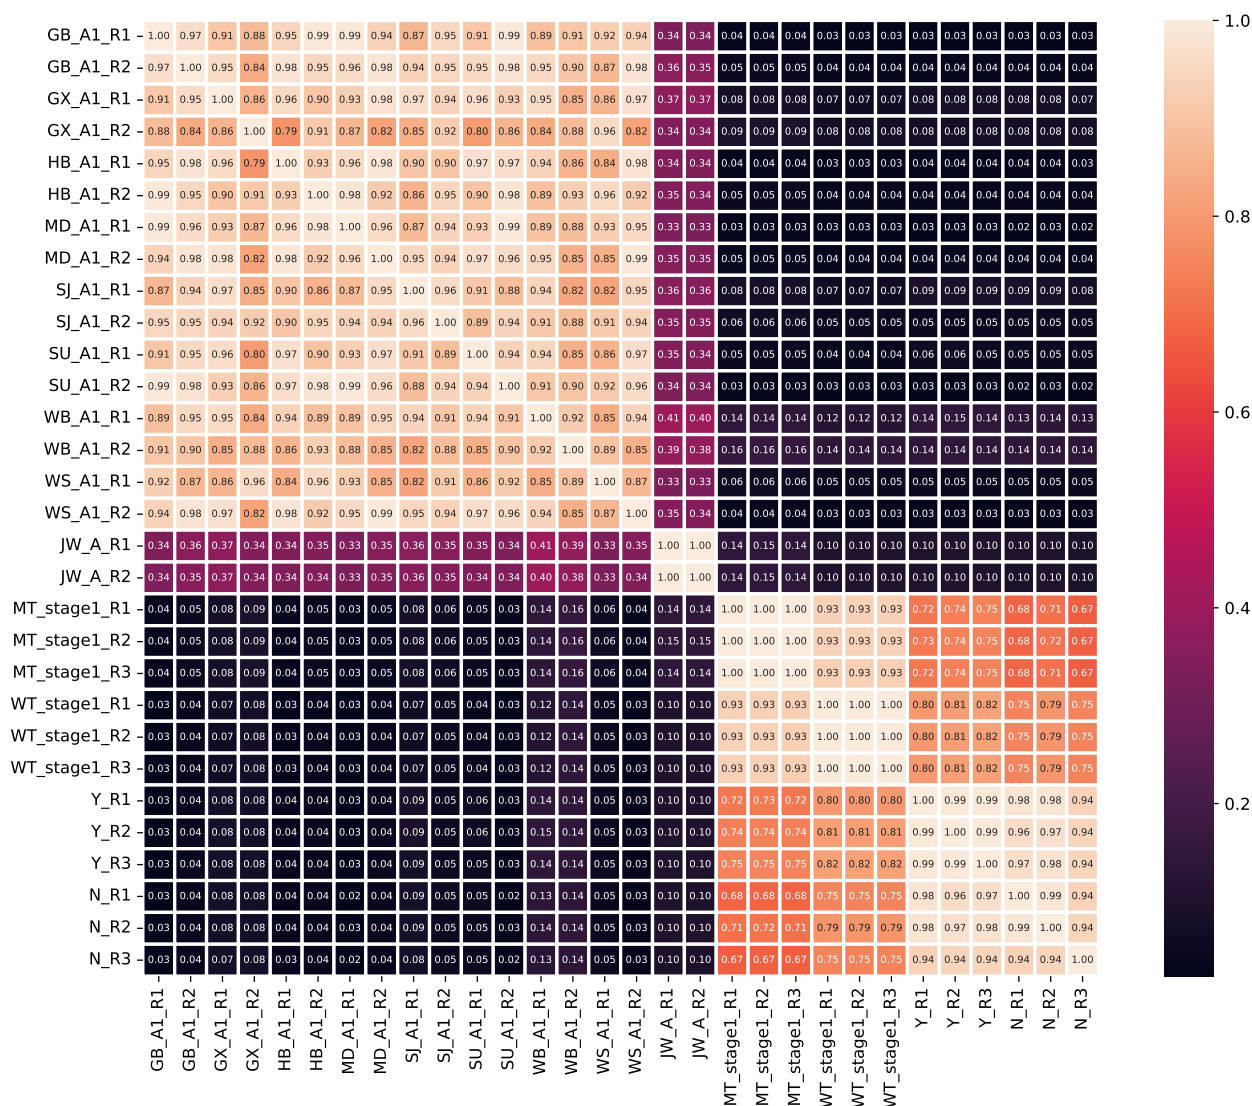

**Supplementary Fig. 32. The correlation analysis of anthers from various pummelo and mandarin cultivars.** These RNA-seq data were obtained from eight pummelos and four mandarins that published previously. Each pummelo has two biological replicates (\_R1 and \_R2) and each mandarin has three biological replicates (\_R1, \_R2 and \_R3). The sample JW\_A (grapefruit) was used as a negative control. Pummelos: GB, ‘Gaoban’ pummelo; GX, ‘Guanximiyou’ pummelo; HB, HB pummelo; MD, ‘Miandian’ pummelo; SJ, ‘Shuijin’ pummelo; SU, Sour pummelo; WB, ‘Wanbai’ pummelo; WS, Acidless pummelo. Mandarins: WT\_stage1, Ponkan mandarin; MT\_stage1, Seedless Ponkan mandarin; Y, Ougan; N, ‘Wuzi’ ougan (the SRR list see Supplementary table 9).

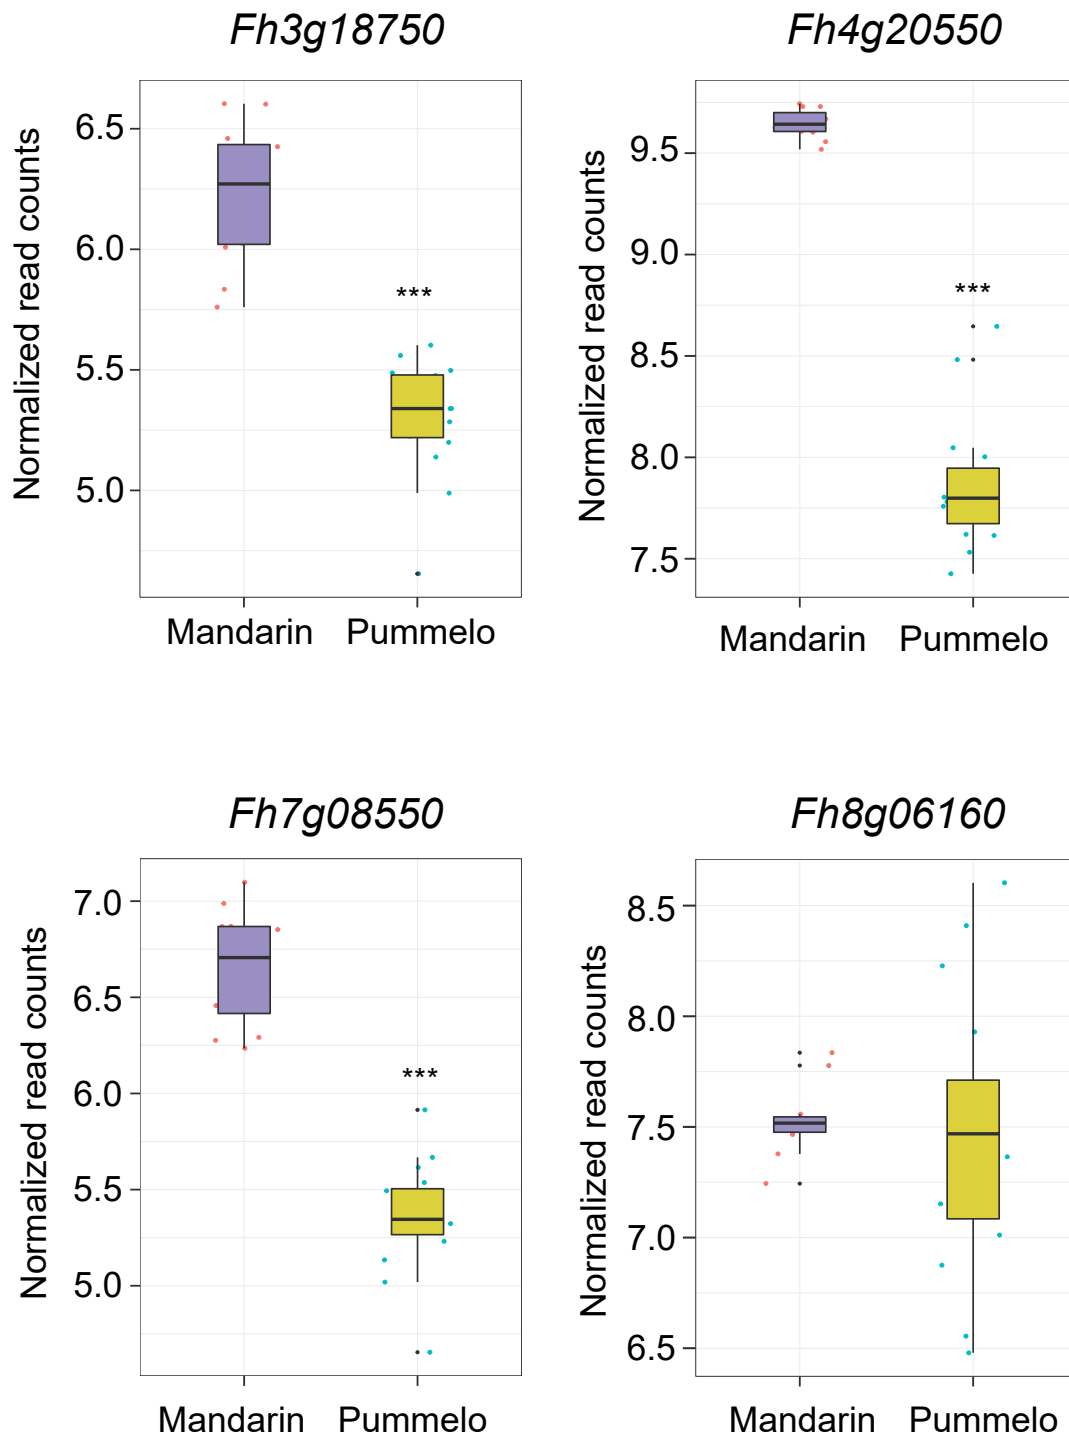

**Supplementary Fig. 33. Expression of four PPR genes in anthers under cytoplasmic-nuclear interaction GWAS analysis.** The expression levels of three PPR genes were significantly higher expressed in mandarin than in pummelo (FDR adjusted  $***p < 0.001$ ). The y-axis represents normalized read counts based on the genome-wide expression matrix.

**Supplementary Table 1. The statistics of data used for mitochondrial genome assembling and reads mapping.**

| Number | Accession ID | Species name                      | Catalog      | Catalog      | Platform | Number of reads | Total bases (Gb) | Average length of reads (bp) | Maximum length of reads (bp) | Cite              | Source       |
|--------|--------------|-----------------------------------|--------------|--------------|----------|-----------------|------------------|------------------------------|------------------------------|-------------------|--------------|
| 1      | BDGJ         | <i>Citrus reticulata</i> (Blanco) | mandarin     | Bendiguang   | nanopore | 362310          | 7.58             | 20932.6                      | 114564                       | this study        | PRJNA807745  |
| 1      | BDGJ         | <i>Citrus reticulata</i> (Blanco) | mandarin     | Bendiguang   | illumina | 34680236        | 5.20             | 150                          | 150                          | this study        | PRJNA807745  |
| 2      | BTC          | <i>Citrus sinensis</i> (Osbeck)   | sweet orange | Bingtang     | pacbio   | 1184308         | 34.62            | 29235.3                      | 779454                       | Wang et al. 2021  | PRJNA321100  |
| 2      | BTC          | <i>Citrus sinensis</i> (Osbeck)   | sweet orange | Bingtang     | illumina | 97396780        | 14.41            | 148                          | 150                          | Wang et al. 2021  | PRJNA321100  |
| 3      | EG           | <i>Citrus reticulata</i>          | mandarin     | Egan         | pacbio   | 351168          | 6.93             | 19745.8                      | 243893                       | this study        | PRJNA807745  |
| 3      | EG           | <i>Citrus reticulata</i>          | mandarin     | Egan         | illumina | 9792964         | 1.47             | 150                          | 150                          | this study        | PRJNA807745  |
| 4      | G1           | <i>Citrus unshiu</i> Macf.        | mandarin     | Guoqing No.1 | pacbio   | 496241          | 5.26             | 10598.7                      | 83563                        | Zhang et al. 2020 | PRJNA598773  |
| 4      | HBP          | <i>Citrus grandis</i>             | pummelo      | Hirado Butan | pacbio   | 601567          | 6.45             | 10723.7                      | 90852                        | Zhang et al. 2020 | PRJNA598773  |
| 5      | HJ           | <i>Citrus reticulata</i> (Blanco) | mandarin     | Hongju       | nanopore | 411901          | 6.40             | 15543.5                      | 96172                        | this study        | PRJNA807745  |
| 5      | HJ           | <i>Citrus reticulata</i> (Blanco) | mandarin     | Hongju       | illumina | 30687038        | 4.60             | 150                          | 150                          | this study        | PRJNA807745  |
| 6      | HKC          | <i>Atalantia buxifolia</i>        | atalantia    | Haokeci      | pacbio   | 7611333         | 25.59            | 3361.4                       | 164214                       | Wang et al. 2017  | PRJNA327148  |
| 6      | HKC          | <i>Atalantia buxifolia</i>        | atalantia    | Haokeci      | illumina | 103877216       | 10.38            | 99.9                         | 100                          | Wang et al. 2017  | PRJNA327148  |
| 7      | JW           | <i>Citrus paradisi</i> Macf.      | grapefruit   | Cocktail     | illumina | 11283382        | 1.69             | 150                          | 150                          | this study        | PRJNA807745  |
| 8      | JZMJ         | <i>Citrus reticulata</i> (Blanco) | mandarin     | Jizhoumi     | nanopore | 634000          | 9.71             | 15313.6                      | 115344                       | this study        | PRJNA807745  |
| 8      | JZMJ         | <i>Citrus reticulata</i> (Blanco) | mandarin     | Jizhoumi     | illumina | 55906288        | 8.39             | 150                          | 150                          | this study        | PRJNA807745  |
| 9      | QS           | <i>Citrus reticulata</i>          | mandarin     | Qianyang     | pacbio   | 451098          | 8.19             | 18153.4                      | 251650                       | this study        | PRJNA807745  |
| 9      | QS           | <i>Citrus reticulata</i>          | mandarin     | Qianyang     | illumina | 9832964         | 1.47             | 150                          | 150                          | this study        | PRJNA807745  |
| 10     | SJG          | <i>Fortunella hindsii</i>         | kumquat      | Shanjingan   | pacbio   | 551765          | 12.00            | 21748.4                      | 112888                       | Zhu et al. 2019   | PRJNA487160  |
| 10     | SJG          | <i>Fortunella hindsii</i>         | kumquat      | Shanjingan   | illumina | 76420022        | 10.76            | 149                          | 150                          | Zhu et al. 2019   | PRJNA487160  |
| 11     | STY          | <i>Citrus grandis</i>             | pummelo      | Shatian      | nanopore | 644776          | 11.85            | 18371.6                      | 154762                       | this study        | PRJNA807745  |
| 11     | STY          | <i>Citrus grandis</i>             | pummelo      | Shatian      | illumina | 53832782        | 8.07             | 150                          | 150                          | this study        | PRJNA807745  |
| 12     | YLK          | <i>Citrus limon</i> (L.) Burm.f.  | lemon        | Eureka       | nanopore | 1808657         | 27.90            | 15427.9                      | 536885                       | this study        | PRJNA807745  |
| 12     | YLK          | <i>Citrus limon</i> (L.) Burm.f.  | lemon        | Eureka       | illumina | 6654594         | 1.00             | 150                          | 150                          | this study        | PRJNA807745  |
| 13     | ZK           | <i>Poncirus trifoliata</i>        | poncirus     | Zhike        | pacbio   | 3372157         | 30.49            | 9040.3                       | 143717                       | Huang et al. 2021 | VKKW00000000 |
| 13     | ZK           | <i>Poncirus trifoliata</i>        | poncirus     | Zhike        | illumina | 10629494        | 1.59             | 150                          | 150                          | this study        | PRJNA807745  |

References:

1. Wang X, et al. (2017) Genomic analyses of primitive, wild and cultivated citrus provide insights into asexual reproduction. *Nature Genetics* 49(5):765-772.
2. Zhu C, et al. (2019) Genome sequencing and CRISPR/Cas9 gene editing of an early flowering Mini-Citrus (*Fortunella hindsii*). *Plant Biotechnology Journal* 17(11): 2199-2210.
3. Zhang S, et al. (2020) Assembly of Satsuma mandarin mitochondrial genome and identification of cytoplasmic male sterility-specific ORFs in a somatic cybrid of pummelo. *Tree Genetics & Genomes* 16(6):1-13.
4. Wang L, et al. (2021) Somatic variations led to the selection of acidic and acidless orange cultivars. *Nature Plants* 7(7):954-965.
5. Huang Y, et al. (2021) Genome of a citrus rootstock and global DNA demethylation caused by heterografting. *Horticulture Research* 8(1):69.

**Supplementary Table 2. The statistics of 16 assemblies and mitochondrial Pan-genome.**

| Accessions | Size (bp) | GC (%) | Repeat sequences  | Gaps | Number of conserved protein genes | Length of coding region (bp) | Number of tRNAs | Length of tRNAs (bp) | Number of rRNAs |
|------------|-----------|--------|-------------------|------|-----------------------------------|------------------------------|-----------------|----------------------|-----------------|
| HKC        | 449354    | 44.72  | 5446 bp ( 1.21 %) | 13   | 34                                | 30667                        | 24              | 1801                 | 3               |
| YLK        | 509002    | 45.05  | 5158 bp ( 1.01 %) | 9    | 35                                | 30383                        | 26              | 1935                 | 3               |
| EG         | 512938    | 45.13  | 5567 bp ( 1.09 %) | 1    | 37                                | 30582                        | 26              | 1934                 | 3               |
| BTC        | 513691    | 45.04  | 5226 bp ( 0.99 %) | 9    | 36                                | 30705                        | 25              | 1870                 | 3               |
| BDGJ       | 519536    | 45.12  | 5303 bp ( 1.02 %) | 1    | 36                                | 30646                        | 26              | 1935                 | 3               |
| JW         | 519898    | 44.99  | 5244 bp ( 1.01 %) | 11   | 36                                | 32437                        | 27              | 2015                 | 3               |
| SJG        | 520158    | 45.05  | 5919 bp ( 1.14 %) | 0    | 35                                | 29470                        | 26              | 1918                 | 3               |
| QS         | 520466    | 45.04  | 5742 bp ( 1.10 %) | 3    | 37                                | 32248                        | 26              | 1937                 | 3               |
| STY        | 526596    | 45.08  | 5054 bp ( 0.98 %) | 2    | 36                                | 30568                        | 26              | 1935                 | 3               |
| JZMJ       | 527901    | 44.95  | 5640 bp ( 1.07 %) | 2    | 37                                | 31076                        | 26              | 1934                 | 3               |
| ZK         | 533342    | 44.95  | 5683 bp ( 1.07 %) | 0    | 35                                | 30829                        | 25              | 1866                 | 3               |
| HJ         | 536281    | 44.68  | 5543 bp ( 1.03 %) | 2    | 36                                | 32309                        | 31              | 2330                 | 3               |
| HBP*       | 518274    | 45.14  | 5218 bp ( 1.01 %) | 0    | 36                                | 29921                        | 26              | 1935                 | 3               |
| G1*        | 521559    | 45.06  | 5592 bp ( 1.07 %) | 0    | 37                                | 30361                        | 26              | 1934                 | 3               |
| Pan-genome | 670817    | 44.12  | 7638 bp ( 1.14 %) | —    | —                                 | —                            | —               | —                    | —               |

References:

1. Zhang S, et al. (2020) Assembly of Satsuma mandarin mitochondrial genome and identification of cytoplasmic male sterility-specific ORFs in a somatic cybrid of pummelo. *Tree Genetics & Genomes* 16(6):1-13.

**Supplementary Table 3. The primers used for filling gaps in kumquat SJG and poncirus ZK assemblies.**

| <b>Name of primer</b> | <b>Forward primer</b> | <b>Reverse primer</b> | <b>Assemble</b> |
|-----------------------|-----------------------|-----------------------|-----------------|
| filling-gaps-16F      | AGCCCGTGCGAATGAAAG    | TCAGCGAGGAAATGGGAACA  | SJG             |
| filling-gaps-518F     | TGCGGTGCTAACGATTTA    | GTCATACCTCCTTCCCGAAAC | SJG             |
| filling-gaps-1158F    | AGGCACTGGTCACGGGTAGG  | CGGCGTCAAGCATTCGTT    | SJG             |
| filling-gaps-3F       | GCGTAGTGGGAATAGCCCC   | TCCCGCAATAACTCGGCATCT | ZK              |
| filling-gaps-1F       | TGCCGTTTCATCCTTTCGT   | TTATCCGAAGGGCACGCA    | ZK              |

**Supplementary Table 4. The homologous region between conserved genes (trans-splicing fragments) and chimera predicted ORFs in the intergenic region of mandarin G1 mitogenome.**

| Accession | Classification | Number | Type                            | Homologous       | Length (bp) | Start (bp) | End (bp) |
|-----------|----------------|--------|---------------------------------|------------------|-------------|------------|----------|
| HKC       | Atalantia      | 1      | predicted ORF on HKC mitogenome | f45              | 381         | 118875     | 119255   |
|           |                |        | conserved gene                  | nad3             | 354         | 67516      | 67163    |
|           |                | 2      | predicted ORF on HKC mitogenome | f56              | 1230        | 122787     | 124016   |
|           |                |        | conserved gene                  | atp8             | 477         | 443506     | 443982   |
|           |                | 3      | predicted ORF on HKC mitogenome | r488             | 894         | 27771      | 28664    |
|           |                |        | conserved gene                  | rps4             | 1044        | 153760     | 154803   |
| ZK        | Poncirus       | 1      | predicted ORF on ZK mitogenome  | f286             | 336         | 209447     | 209782   |
|           |                |        | trans-splicing fragment         | nad5_fragment_1  | 237         | 291625     | 291389   |
|           |                | 2      | predicted ORF on ZK mitogenome  | f1197            | 921         | 97501      | 98421    |
|           |                |        | conserved gene                  | rps4             | 1044        | 457118     | 458161   |
|           |                | 3      | predicted ORF on ZK mitogenome  | r1080            | 357         | 502116     | 502472   |
|           |                |        | conserved gene                  | nad3             | 354         | 223260     | 222907   |
|           |                | 4      | predicted ORF on ZK mitogenome  | f781             | 1017        | 405577     | 406593   |
|           |                |        | trans-splicing fragment         | nad5_fragment_1  | 237         | 291625     | 291389   |
|           |                | 5      | predicted ORF on ZK mitogenome  | f1152            | 711         | 7897       | 8607     |
|           |                |        | conserved gene                  | sdh3             | 291         | 211650     | 211360   |
|           |                | 6      | predicted ORF on ZK mitogenome  | r182             | 654         | 166380     | 167033   |
|           |                |        | trans-splicing fragment         | ccmFc_fragment_1 | 771         | 190432     | 189662   |
| JG        | Kumquat        | 1      | predicted ORF on JG mitogenome  | r1228            | 276         | 86903      | 87178    |
|           |                |        | trans-splicing fragment         | ccmFc_fragment_1 | 771         | 482922     | 483692   |
|           |                | 2      | predicted ORF on JG mitogenome  | r74              | 339         | 119365     | 119703   |
|           |                |        | conserved gene                  | rps4             | 1044        | 118898     | 119941   |
|           |                | 3      | predicted ORF on JG mitogenome  | f474             | 834         | 273581     | 274414   |
|           | conserved gene | atp8   | 477                             | 86124            | 85648       |            |          |
|           |                | 4      | predicted ORF on JG mitogenome  | r832             | 975         | 407870     | 408844   |
|           |                |        | conserved gene                  | rps4             | 1044        | 118898     | 119941   |
|           |                | 5      | predicted ORF on JG mitogenome  | r1105            | 1956        | 44162      | 46117    |
|           |                |        | conserved gene                  | atp1             | 1521        | 464498     | 466018   |

|      |          |   |                                                             |                                            |             |                  |                  |
|------|----------|---|-------------------------------------------------------------|--------------------------------------------|-------------|------------------|------------------|
| EG   | Mandarin | 1 | predicted ORF on EG mitogenome<br>conserved gene            | r23<br>atp8                                | 783<br>477  | 108612<br>82232  | 109394<br>81756  |
|      |          | 2 | predicted ORF on EG mitogenome<br>conserved gene            | r510<br>rps4                               | 984<br>1044 | 291608<br>320020 | 292591<br>321063 |
|      |          | 3 | predicted ORF on EG mitogenome<br>trans-splicing fragment   | f988<br>nad5_fragment_1                    | 1104<br>237 | 464670<br>188906 | 465773<br>188670 |
|      |          | 4 | predicted ORF on EG mitogenome<br>trans-splicing fragment   | r1168 ( <i>orf384</i> )<br>nad5_fragment_1 | 1155<br>237 | 83068<br>188906  | 84222<br>188670  |
| JZMJ | Mandarin | 1 | predicted ORF on JZMJ mitogenome<br>conserved gene          | r379<br>atp8                               | 783<br>477  | 254262<br>17287  | 255044<br>16811  |
|      |          | 2 | predicted ORF on JZMJ mitogenome<br>trans-splicing fragment | f1007<br>nad5_fragment_1                   | 1104<br>237 | 479633<br>334547 | 480736<br>334311 |
|      |          | 3 | predicted ORF on JZMJ mitogenome<br>conserved gene          | r1200<br>matR                              | 306<br>1983 | 95298<br>96499   | 95603<br>94517   |
|      |          | 4 | predicted ORF on JZMJ mitogenome<br>conserved gene          | r88<br>rps4                                | 984<br>1044 | 134722<br>163134 | 135705<br>164177 |
|      |          | 5 | predicted ORF on JZMJ mitogenome<br>trans-splicing fragment | r204 ( <i>orf384</i> )<br>nad5_fragment_1  | 1155<br>237 | 18123<br>334547  | 19277<br>334311  |
| HJ   | Mandarin | 1 | predicted ORF on HJ mitogenome<br>trans-splicing fragment   | f1021<br>nad5_fragment_1                   | 1104<br>237 | 488013<br>47485  | 489116<br>47249  |
|      |          | 2 | predicted ORF on HJ mitogenome<br>conserved gene            | r419<br>atp8                               | 783<br>477  | 269727<br>17287  | 270509<br>16811  |
|      |          | 3 | predicted ORF on HJ mitogenome<br>trans-splicing fragment   | r205( <i>orf384</i> )<br>nad5_fragment_1   | 1155<br>237 | 18123<br>47485   | 19277<br>47249   |
|      |          | 4 | predicted ORF on HJ mitogenome<br>conserved gene            | r130<br>rps4                               | 984<br>1044 | 150187<br>178599 | 151170<br>179642 |
| QS   | Mandarin | 1 | predicted ORF on QS mitogenome<br>conserved gene            | f364<br>sdh3                               | 1080<br>291 | 242920<br>243208 | 243999<br>243498 |
|      |          | 2 | predicted ORF on QS mitogenome<br>trans-splicing fragment   | f976<br>nad5_fragment_1                    | 1104<br>237 | 471971<br>293443 | 473074<br>293207 |
|      |          | 3 | predicted ORF on QS mitogenome<br>trans-splicing fragment   | r1229( <i>orf384</i> )<br>nad5_fragment_1  | 1155<br>237 | 89452<br>293443  | 90606<br>293207  |



|     |          |   |                                                            |                                           |              |                  |                  |
|-----|----------|---|------------------------------------------------------------|-------------------------------------------|--------------|------------------|------------------|
|     |          | 4 | pridicted ORF on QS mitogenome<br>conserved gene           | r280<br>atp8                              | 783<br>477   | 213162<br>88616  | 213944<br>88140  |
|     |          | 5 | pridicted ORF on QS mitogenome<br>conserved gene           | f591<br>rps4                              | 984<br>1044  | 324289<br>122034 | 325272<br>123077 |
| G1  | Mandarin | 1 | pridicted ORF on G1 mitogenome<br>conserved gene           | r427<br>atp8                              | 783<br>477   | 270337<br>505681 | 271119<br>505205 |
|     |          | 2 | pridicted ORF on G1 mitogenome<br>conserved gene           | r127<br>rps4                              | 984<br>1044  | 150797<br>179209 | 151780<br>180252 |
|     |          | 3 | pridicted ORF on G1 mitogenome<br>trans-splicing fragment  | r982( <i>orf374</i> )<br>nad5_fragment_1  | 1122<br>237  | 47166<br>350616  | 48287<br>350380  |
|     |          | 4 | pridicted ORF on G1 mitogenome<br>trans-splicing fragment  | r1084( <i>orf384</i> )<br>nad5_fragment_1 | 1155<br>237  | 506517<br>350616 | 507671<br>350380 |
| HBP | Pummelo  | 1 | pridicted ORF on HBP mitogenome<br>conserved gene          | r810<br>nad3                              | 381<br>354   | 400209<br>95406  | 400589<br>95053  |
|     |          | 2 | pridicted ORF on HBP mitogenome<br>trans-splicing fragment | f876<br>nad5_fragment_1                   | 1104<br>237  | 429840<br>364762 | 430943<br>364998 |
|     |          | 3 | pridicted ORF on HBP mitogenome<br>conserved gene          | r969<br>rps4                              | 975<br>1044  | 46452<br>447416  | 47426<br>448459  |
|     |          | 4 | pridicted ORF on HBP mitogenome<br>conserved gene          | r1222<br>atp1                             | 1965<br>1521 | 95539<br>436754  | 97503<br>438274  |
|     |          | 5 | pridicted ORF on HBP mitogenome<br>conserved gene          | r800<br>atp8                              | 450<br>477   | 397870<br>137569 | 398319<br>137093 |
|     |          | 6 | pridicted ORF on HBP mitogenome<br>trans-splicing fragment | f75<br>ccmFc_fragment_1                   | 507<br>771   | 138388<br>28793  | 138894<br>28023  |
| STY | Pummelo  | 1 | pridicted ORF on STY mitogenome<br>conserved gene          | r805<br>nad3                              | 381<br>354   | 394740<br>89715  | 395120<br>89362  |
|     |          | 2 | pridicted ORF on STY mitogenome<br>conserved gene          | r1226<br>atp1                             | 1629<br>1521 | 90411<br>431285  | 92039<br>432805  |
|     |          | 3 | pridicted ORF on STY mitogenome<br>trans-splicing fragment | f62<br>ccmFc_fragment_1                   | 507<br>771   | 132930<br>23109  | 133436<br>22339  |
|     |          | 4 | pridicted ORF on STY mitogenome<br>trans-splicing fragment | f872<br>nad5_fragment_1                   | 1104<br>237  | 424371<br>359292 | 425474<br>359528 |

|     |        |   |                                                            |                           |              |                  |                  |
|-----|--------|---|------------------------------------------------------------|---------------------------|--------------|------------------|------------------|
| YLK | Hybrid | 5 | predicted ORF on STY mitogenome<br>conserved gene          | r833<br>rps4              | 975<br>1044  | 40768<br>441947  | 41742<br>442990  |
|     |        | 6 | predicted ORF on STY mitogenome<br>conserved gene          | r794<br>atp8              | 450<br>477   | 392401<br>132111 | 392850<br>131635 |
|     |        | 1 | predicted ORF on YLK mitogenome<br>conserved gene          | f931<br>rps4              | 975<br>1044  | 461550<br>384286 | 462524<br>385329 |
|     |        | 2 | predicted ORF on YLK mitogenome<br>trans-splicing fragment | f699<br>nad5_fragment_1   | 921<br>237   | 366893<br>265884 | 367813<br>266120 |
|     |        | 3 | predicted ORF on YLK mitogenome<br>conserved gene          | r912<br>atp1              | 1965<br>1521 | 45490<br>373624  | 47454<br>375144  |
|     |        | 4 | predicted ORF on YLK mitogenome<br>trans-splicing fragment | r201<br>nad5_fragment_1   | 1653<br>237  | 180530<br>265884 | 182182<br>266120 |
|     |        | 5 | predicted ORF on YLK mitogenome<br>conserved gene          | f271<br>nad3              | 381<br>354   | 211445<br>45357  | 211825<br>45004  |
|     |        | 6 | predicted ORF on YLK mitogenome<br>trans-splicing fragment | r1194<br>ccmFc_fragment_1 | 903<br>771   | 91314<br>480188  | 92216<br>480958  |
|     |        | 7 | predicted ORF on YLK mitogenome<br>conserved gene          | f281<br>atp8              | 450<br>477   | 213715<br>90752  | 214164<br>90276  |
|     |        | 1 | predicted ORF on BTC mitogenome<br>trans-splicing fragment | f716<br>nad5_fragment_1   | 1104<br>237  | 379171<br>314092 | 380274<br>314328 |
|     |        | 2 | predicted ORF on BTC mitogenome<br>conserved gene          | r649<br>nad3              | 381<br>354   | 349540<br>41003  | 349920<br>40650  |
|     |        | 3 | predicted ORF on BTC mitogenome<br>conserved gene          | r959<br>rps4              | 813<br>1044  | 466526<br>61973  | 467338<br>62903  |
|     |        | 4 | predicted ORF on BTC mitogenome<br>trans-splicing fragment | f112<br>ccmFc_fragment_1  | 507<br>771   | 151850<br>484899 | 152356<br>485669 |
|     |        | 5 | predicted ORF on BTC mitogenome<br>conserved gene          | r639<br>atp8              | 450<br>477   | 347201<br>151031 | 347650<br>150555 |
| BTC | Hybrid | 1 | predicted ORF on JW mitogenome<br>conserved gene           | r811<br>atp8              | 450<br>477   | 416231<br>89491  | 416680<br>89015  |
|     |        | 2 | predicted ORF on JW mitogenome<br>trans-splicing fragment  | f1207<br>ccmFc_fragment_1 | 507<br>771   | 90310<br>491105  | 90816<br>491875  |

|      |        |   |                                                             |                          |              |                  |                  |
|------|--------|---|-------------------------------------------------------------|--------------------------|--------------|------------------|------------------|
| JW   | Hybrid | 3 | predicted ORF on JW mitogenome<br>conserved gene            | r955<br>rps4             | 813<br>930   | 472732<br>158755 | 473544<br>159685 |
|      |        | 4 | predicted ORF on JW mitogenome<br>conserved gene            | f584<br>matR             | 339<br>1983  | 316837<br>316871 | 317175<br>314889 |
|      |        | 5 | predicted ORF on JW mitogenome<br>conserved gene            | r821<br>nad3             | 381<br>354   | 418570<br>48631  | 418950<br>48278  |
|      |        | 6 | predicted ORF on JW mitogenome<br>trans-splicing fragment   | f918<br>nad5_fragment_1  | 1104<br>237  | 448201<br>383122 | 449304<br>383358 |
|      |        | 1 | predicted ORF on BDGJ mitogenome<br>trans-splicing fragment | r275<br>nad5_fragment_1  | 1104<br>237  | 196970<br>263152 | 198073<br>262916 |
|      |        | 2 | predicted ORF on BDGJ mitogenome<br>conserved gene          | r249<br>atp1             | 1965<br>1521 | 189336<br>461557 | 191300<br>463077 |
| BDGJ | Hybrid | 3 | predicted ORF on BDGJ mitogenome<br>trans-splicing fragment | r866<br>ccmFc_fragment_1 | 507<br>771   | 420023<br>490744 | 420529<br>491514 |
|      |        | 4 | predicted ORF on BDGJ mitogenome<br>conserved gene          | f987<br>rps4             | 975<br>1044  | 472111<br>281443 | 473085<br>280400 |
|      |        | 5 | predicted ORF on BDGJ mitogenome<br>conserved gene          | f339<br>atp8             | 450<br>477   | 229594<br>421348 | 230043<br>421824 |
|      |        | 6 | predicted ORF on BDGJ mitogenome<br>conserved gene          | f328<br>nad3             | 381<br>354   | 227324<br>189203 | 227704<br>188850 |

Notes:

1. The chimera ORFs were homologous but not overlapped with conserved genes or trans-splicing fragments (in the intergenic region). The position (start and end) was based on each mitogenome.
2. The predicted ORF *orf374* was displayed with purple, while the predicted ORF *orf384* was displayed with green.
3. The SRRs of previous non coding RNA-seq data from HBP, G1 and the alloplasmic G1+HBP were SRR10828043, SRR10821405 and SRR10841903, respectively.
4. The SRRs of newly sequencing non coding RNA-seq from BTC and the alloplasmic G1+BTC were SRR20645581 and SRR20645582, respectively.

**Supplementary Table 5. The identified SVs by assemblies' alignment and long reads mapping.**

| Position (bp) | Types | Information                      | Genotypes |    |         |    |    |    |      |    |    |     |     |     |   |
|---------------|-------|----------------------------------|-----------|----|---------|----|----|----|------|----|----|-----|-----|-----|---|
|               |       |                                  | HKC       | JW | YLKBDGJ | EG | G1 | HJ | JZMJ | QS | ZK | HBP | STY | BTC |   |
| 53331         | <DEL> | SVTYPE=DEL;END=54188;LEN=857     | 1         | 0  | 0       | 0  | 0  | 0  | 0    | 0  | 0  | 0   | 0   | 0   | 0 |
| 53349         | <INV> | SVTYPE=INV;END=95521;LEN=42172   | 0         | 0  | 0       | 0  | 0  | 1  | 0    | 0  | 0  | 0   | 0   | 0   | 0 |
| 53360         | <INS> | SVTYPE=INS;END=53486;LEN=101     | 0         | 1  | 0       | 0  | 0  | 0  | 0    | 0  | 0  | 0   | 0   | 1   | 0 |
| 53486         | <DEL> | SVTYPE=DEL;END=54786;LEN=1300    | 0         | 0  | 0       | 0  | 0  | 0  | 0    | 0  | 0  | 0   | 0   | 0   | 1 |
| 54786         | <DUP> | SVTYPE=DUP;END=54912;LEN=126     | 0         | 1  | 0       | 0  | 0  | 0  | 0    | 0  | 0  | 0   | 0   | 0   | 0 |
| 74571         | <DEL> | SVTYPE=DEL;END=76435;LEN=1864    | 0         | 1  | 0       | 0  | 0  | 0  | 0    | 0  | 0  | 0   | 0   | 0   | 0 |
| 82284         | <INV> | SVTYPE=INV;END=115598;LEN=33314  | 1         | 0  | 0       | 0  | 0  | 0  | 0    | 0  | 0  | 0   | 0   | 0   | 0 |
| 87485         | <INS> | SVTYPE=INS;END=87735;LEN=3474    | 0         | 0  | 1       | 0  | 0  | 0  | 0    | 0  | 0  | 0   | 0   | 0   | 0 |
| 95521         | <INV> | SVTYPE=INV;END=119658;LEN=24137  | 0         | 0  | 0       | 0  | 0  | 0  | 0    | 0  | 1  | 0   | 0   | 0   | 0 |
| 104293        | <INV> | SVTYPE=INV;END=127531;LEN=23238  | 0         | 1  | 0       | 0  | 0  | 0  | 0    | 0  | 0  | 0   | 0   | 0   | 0 |
| 104293        | <INV> | SVTYPE=INV;END=178427;LEN=74134  | 0         | 0  | 1       | 0  | 0  | 0  | 0    | 0  | 0  | 0   | 0   | 0   | 0 |
| 104293        | <INV> | SVTYPE=INV;END=119658;LEN=15365  | 0         | 0  | 0       | 0  | 1  | 0  | 1    | 1  | 0  | 0   | 0   | 0   | 0 |
| 104293        | <INS> | SVTYPE=INS;END=178922;LEN=544    | 0         | 0  | 0       | 0  | 0  | 0  | 0    | 0  | 0  | 1   | 1   | 0   | 0 |
| 118239        | <INS> | SVTYPE=INS;END=118252;LEN=15788  | 0         | 0  | 0       | 0  | 0  | 1  | 0    | 0  | 0  | 0   | 0   | 0   | 0 |
| 118252        | <INS> | SVTYPE=INS;END=126989;LEN=815    | 1         | 0  | 0       | 0  | 0  | 0  | 0    | 0  | 0  | 0   | 0   | 0   | 0 |
| 119658        | <INV> | SVTYPE=INV;END=157606;LEN=37949  | 0         | 0  | 0       | 0  | 0  | 1  | 0    | 0  | 0  | 0   | 0   | 0   | 0 |
| 173142        | <INV> | SVTYPE=INV;END=228845;LEN=55703  | 1         | 0  | 0       | 0  | 0  | 0  | 0    | 0  | 0  | 0   | 0   | 0   | 0 |
| 173602        | <INV> | SVTYPE=INV;END=225254;LEN=51652  | 0         | 0  | 0       | 0  | 0  | 0  | 0    | 0  | 1  | 0   | 0   | 0   | 0 |
| 173602        | <INV> | SVTYPE=INV;END=352163;LEN=178561 | 0         | 0  | 0       | 0  | 0  | 0  | 1    | 1  | 0  | 0   | 0   | 0   | 0 |
| 173650        | <INV> | SVTYPE=INV;END=228845;LEN=55195  | 0         | 0  | 0       | 1  | 0  | 0  | 0    | 0  | 0  | 0   | 0   | 0   | 0 |
| 173650        | <INV> | SVTYPE=INV;END=293166;LEN=119516 | 0         | 1  | 0       | 0  | 0  | 0  | 0    | 0  | 0  | 0   | 0   | 0   | 0 |
| 204624        | <INV> | SVTYPE=INV;END=396033;LEN=191409 | 0         | 0  | 0       | 0  | 1  | 0  | 0    | 0  | 0  | 0   | 0   | 0   | 0 |
| 204624        | <INV> | SVTYPE=INV;END=293166;LEN=88542  | 0         | 0  | 0       | 0  | 0  | 0  | 0    | 0  | 0  | 0   | 1   | 1   | 0 |
| 225462        | <INV> | SVTYPE=INV;END=281615;LEN=56153  | 0         | 0  | 1       | 0  | 0  | 0  | 0    | 0  | 0  | 0   | 0   | 0   | 0 |
| 225462        | <INV> | SVTYPE=INV;END=293166;LEN=67704  | 0         | 0  | 0       | 0  | 0  | 0  | 0    | 0  | 0  | 0   | 0   | 0   | 1 |
| 228845        | <INV> | SVTYPE=INV;END=282179;LEN=53334  | 0         | 0  | 0       | 0  | 0  | 0  | 0    | 0  | 0  | 1   | 0   | 0   | 0 |
| 228845        | <INV> | SVTYPE=INV;END=280184;LEN=51339  | 0         | 0  | 0       | 0  | 0  | 0  | 0    | 0  | 0  | 0   | 1   | 1   | 0 |
| 265424        | <INV> | SVTYPE=INV;END=300925;LEN=35501  | 0         | 0  | 0       | 0  | 0  | 0  | 0    | 0  | 1  | 0   | 0   | 0   | 0 |
| 265424        | <INS> | SVTYPE=INS;END=300925;LEN=20081  | 0         | 0  | 0       | 0  | 0  | 1  | 0    | 0  | 0  | 0   | 0   | 0   | 0 |
| 280957        | <INV> | SVTYPE=INV;END=337799;LEN=56842  | 1         | 0  | 0       | 0  | 0  | 0  | 0    | 0  | 0  | 0   | 0   | 0   | 0 |
| 293442        | <INV> | SVTYPE=INV;END=351911;LEN=58469  | 0         | 0  | 0       | 1  | 0  | 0  | 0    | 0  | 0  | 0   | 0   | 0   | 0 |
| 317808        | <INV> | SVTYPE=INV;END=380156;LEN=62348  | 0         | 0  | 0       | 0  | 0  | 0  | 0    | 0  | 1  | 0   | 0   | 0   | 0 |
| 317815        | <INS> | SVTYPE=INS;END=382423;LEN=106    | 0         | 0  | 0       | 0  | 0  | 0  | 0    | 0  | 1  | 0   | 0   | 0   | 0 |
| 338046        | <DEL> | SVTYPE=DEL;END=472283;LEN=134237 | 0         | 0  | 0       | 0  | 0  | 1  | 0    | 0  | 0  | 0   | 0   | 0   | 0 |

|        |       |                                 |   |   |   |   |   |   |   |   |   |   |   |   |   |
|--------|-------|---------------------------------|---|---|---|---|---|---|---|---|---|---|---|---|---|
| 345824 | <INV> | SVTYPE=INV;END=351911;LEN=6087  | 1 | 0 | 0 | 0 | 0 | 0 | 0 | 0 | 0 | 0 | 0 | 0 | 0 |
| 347664 | <INV> | SVTYPE=INV;END=390365;LEN=42701 | 0 | 1 | 0 | 0 | 0 | 0 | 0 | 0 | 0 | 0 | 0 | 0 | 0 |
| 347664 | <INV> | SVTYPE=INV;END=401469;LEN=53805 | 0 | 0 | 0 | 0 | 0 | 0 | 0 | 0 | 0 | 0 | 1 | 1 | 0 |
| 347664 | <INV> | SVTYPE=INV;END=436662;LEN=88998 | 0 | 0 | 1 | 0 | 0 | 0 | 0 | 0 | 0 | 0 | 0 | 0 | 0 |
| 357052 | <DEL> | SVTYPE=DEL;END=357618;LEN=566   | 1 | 0 | 0 | 0 | 0 | 0 | 0 | 0 | 0 | 0 | 0 | 0 | 0 |
| 362681 | <DEL> | SVTYPE=DEL;END=362779;LEN=98    | 0 | 0 | 0 | 0 | 0 | 0 | 0 | 0 | 0 | 1 | 0 | 0 | 0 |
| 373663 | <INS> | SVTYPE=INS;END=391064;LEN=101   | 1 | 0 | 0 | 0 | 0 | 0 | 0 | 0 | 0 | 0 | 0 | 0 | 0 |
| 373671 | <DUP> | SVTYPE=DUP;END=382660;LEN=8989  | 0 | 0 | 0 | 0 | 0 | 0 | 0 | 1 | 0 | 0 | 0 | 0 | 0 |
| 373671 | <INS> | SVTYPE=INS;END=382660;LEN=17353 | 0 | 0 | 0 | 1 | 0 | 0 | 1 | 0 | 0 | 0 | 0 | 0 | 1 |
| 386288 | <DEL> | SVTYPE=DEL;END=387303;LEN=1015  | 0 | 0 | 0 | 0 | 0 | 0 | 0 | 0 | 0 | 1 | 0 | 0 | 0 |
| 394229 | <INS> | SVTYPE=INS;END=417237;LEN=101   | 0 | 1 | 0 | 0 | 0 | 0 | 0 | 0 | 0 | 0 | 0 | 0 | 0 |
| 401578 | <INV> | SVTYPE=INV;END=472283;LEN=70705 | 0 | 0 | 0 | 0 | 1 | 0 | 1 | 1 | 1 | 0 | 0 | 0 | 0 |
| 401578 | <INV> | SVTYPE=INV;END=472602;LEN=71024 | 0 | 0 | 0 | 0 | 0 | 0 | 0 | 0 | 0 | 0 | 1 | 1 | 0 |
| 401578 | <DEL> | SVTYPE=DEL;END=472283;LEN=70705 | 0 | 0 | 0 | 0 | 0 | 0 | 0 | 0 | 0 | 1 | 0 | 0 | 0 |
| 406108 | <INS> | SVTYPE=INS;END=473323;LEN=101   | 1 | 0 | 0 | 0 | 0 | 0 | 0 | 0 | 0 | 0 | 0 | 0 | 0 |
| 407177 | <INV> | SVTYPE=INV;END=469893;LEN=62716 | 0 | 0 | 0 | 1 | 0 | 0 | 0 | 0 | 0 | 0 | 0 | 0 | 0 |
| 421176 | <INS> | SVTYPE=INS;END=474028;LEN=101   | 0 | 1 | 0 | 0 | 0 | 0 | 0 | 0 | 0 | 0 | 0 | 0 | 0 |
| 439771 | <INV> | SVTYPE=INV;END=472602;LEN=32831 | 0 | 0 | 1 | 0 | 0 | 0 | 0 | 0 | 0 | 0 | 0 | 0 | 0 |
| 479157 | <INV> | SVTYPE=INV;END=514520;LEN=35363 | 0 | 0 | 0 | 0 | 0 | 0 | 0 | 0 | 0 | 0 | 0 | 0 | 1 |

**Supplementary Table 6. The Illumina short reads of 184 accessions in citrus used in this study.**

| <b>Samples</b>   | <b>Accessions</b> | <b>Classification</b> | <b>SRR ID</b> | <b>Source</b>     |
|------------------|-------------------|-----------------------|---------------|-------------------|
| Atalantia_CDSJ   | CDSJ              | Atalantia             | SRR3989910    | Wang et al. 2017  |
| Atalantia_GDMM   | GDMM              | Atalantia             | SRR3990142    | Wang et al. 2017  |
| Atalantia_HDGKZ  | HDGKZ             | Atalantia             | SRR3990145    | Wang et al. 2017  |
| Atalantia_HKC    | HKC               | Atalantia             | SRR3988729    | Wang et al. 2017  |
| Atalantia_JBL    | JBL               | Atalantia             | SRR3988460    | Wang et al. 2017  |
| Atalantia_SND    | SND               | Atalantia             | SRR3990714    | Wang et al. 2017  |
| Atalantia_WNNL   | WNNL              | Atalantia             | SRR3990759    | Wang et al. 2017  |
| Atalantia_WNSMW  | WNSMW             | Atalantia             | SRR3992564    | Wang et al. 2017  |
| Atalantia_WSD    | WSD               | Atalantia             | SRR3992888    | Wang et al. 2017  |
| citron_JY28      | JY28              | Citron                | SRR3948093    | Wang et al. 2017  |
| citron_JY4       | JY4               | Citron                | SRR3944125    | Wang et al. 2017  |
| citron_JY5       | JY5               | Citron                | SRR3944139    | Wang et al. 2017  |
| citron_XZ1       | XZ1               | Citron                | SRR3938253    | Wang et al. 2017  |
| citron_XZ        | XZ                | Citron                | SRR3938056    | Wang et al. 2017  |
| Climent2013      | Climent2013       | Mandarin              | SRR1022654    | Wu et al. 2014    |
| grapefruit_14J   | 14J               | Grapefruit            | SRR3926757    | Wang et al. 2017  |
| grapefruit_Flame | Flame             | Grapefruit            | SRR3927405    | Wang et al. 2017  |
| grapefruit_HJ    | HJ                | Grapefruit            | SRR9128709    | Liang et al. 2020 |
| grapefruit_PAR   | PAR               | Grapefruit            | SRR6188447    | Wu et al. 2018    |
| grapefruit_Ruby  | Ruby              | Grapefruit            | SRR3927447    | Wang et al. 2017  |
| ichang_JF        | JF                | Papeda                | SRR3929760    | Wang et al. 2017  |
| ichang_KM        | KM                | Papeda                | SRR3929763    | Wang et al. 2017  |
| ichang_TK        | TK                | Papeda                | SRR3929810    | Wang et al. 2017  |
| ichang_XJC       | XJC               | Papeda                | SRR3928212    | Wang et al. 2017  |
| ichang_YCC       | YCC               | Papeda                | SRR3928564    | Wang et al. 2017  |
| ichang_YCLS      | YCLS              | Papeda                | SRR3929790    | Wang et al. 2017  |
| ichang_YCYJ      | YCYJ              | Papeda                | SRR3929943    | Wang et al. 2017  |
| ichang_YL        | YL                | Papeda                | SRR3930078    | Wang et al. 2017  |
| ichang_ZY        | ZY                | Papeda                | SRR3931949    | Wang et al. 2017  |
| JgA12            | A12               | Kumquat               | SRR14766309   | PRJNA736109       |
| JgA14            | A14               | Kumquat               | SRR14766314   | PRJNA736109       |
| JinLanYou        | JLY               | pummelo               | SRR18120052   | PRJNA807745       |
| JSYA             | JSY               | pummelo               | SRR18120051   | PRJNA807745       |
| lemon_05L-06     | 05L-06            | Lemon                 | SRR9129152    | Liang et al. 2020 |
| lemon_BJ         | BJ                | Lemon                 | SRR14765191   | PRJNA736194       |
| lemon_JY22       | JY22              | Lemon                 | SRR3948190    | Wang et al. 2017  |
| lemon_LS         | LS                | Lemon                 | SRR3948277    | Wang et al. 2017  |
| lemon_ML         | ML                | Lemon                 | SRR3948324    | Wang et al. 2017  |
| Ma21CAR          | CAR               | Shikinari-mikan       | SRR14460013   | Wu et al. 2021    |
| Ma21C10          | C10               | Citron                | SRR14460012   | Wu et al. 2021    |
| Ma21C11          | C11               | Citron                | SRR14460011   | Wu et al. 2021    |
| Ma21C12          | C12               | pummelo x Citron      | SRR14460010   | Wu et al. 2021    |
| Ma21ISH          | ISH               | Mandarin              | SRR14453878   | Wu et al. 2021    |
| Ma21OBN          | OBN               | Mandarin              | SRR14453873   | Wu et al. 2021    |
| Ma21R00          | R00               | Deedee (Nakijin)      | SRR14509908   | Wu et al. 2021    |
| Ma21RK3          | RK3               | Mandarin              | SRR14453874   | Wu et al. 2021    |
| Ma21TK1          | TK1               | Mandarin              | SRR14453879   | Wu et al. 2021    |
| mandarin_18H     | 18H               | Mandarin              | SRR3749605    | Xu et al. 2013    |
| mandarin_19P     | 19P               | Mandarin              | SRR3747617    | Xu et al. 2013    |
| mandarin_20H     | 20H               | Mandarin              | SRR3747635    | Wang et al. 2018  |
| mandarin_BTJ     | BTJ               | Mandarin              | SRR3756893    | Wu et al. 2014    |
| mandarin_CSNJ    | CSNJ              | Mandarin              | SRR3747609    | Wang et al. 2018  |
| mandarin_CYY     | CYY               | Mandarin              | SRR3747399    | Wang et al. 2018  |
| mandarin_CZG     | CZG               | Mandarin              | SRR3747583    | Wang et al. 2018  |
| mandarin_DFZS    | DFZS              | Mandarin              | SRR5807899    | Wang et al. 2018  |

|                |               |                 |             |                   |
|----------------|---------------|-----------------|-------------|-------------------|
| mandarin_DX1   | DX1           | Mandarin        | SRR5796819  | Wang et al. 2018  |
| mandarin_DX2   | DX2           | Mandarin        | SRR5796821  | Wang et al. 2018  |
| mandarin_DX3   | DX3           | Mandarin        | SRR5796820  | Wang et al. 2018  |
| mandarin_DX4   | DX4           | Mandarin        | SRR5796645  | Wang et al. 2018  |
| mandarin_HPJ   | HPJ           | Mandarin        | SRR3750611  | Wang et al. 2018  |
| mandarin_HZ    | HZ            | Mandarin        | SRR3747527  | Wang et al. 2018  |
| mandarin_JGA   | JGA           | Mandarin        | SRR5796822  | Wang et al. 2018  |
| mandarin_JYY   | JYY           | Mandarin        | SRR5796862  | Wang et al. 2018  |
| mandarin_KSH   | KSH           | Mandarin        | SRR6188456  | Wu et al. 2018    |
| mandarin_KYM   | KYM           | Mandarin        | SRR3820643  | Wang et al. 2017  |
| mandarin_LYJ   | LYJ           | Mandarin        | SRR3756887  | Wu et al. 2014    |
| mandarin_MLTJ  | MLTJ          | Mandarin        | SRR3750679  | Wang et al. 2018  |
| mandarin_MS1   | MS1           | Mandarin        | SRR5796818  | Wang et al. 2018  |
| mandarin_MS2   | MS2           | Mandarin        | SRR5796635  | Wang et al. 2018  |
| mandarin_MSJ   | MSJ           | Mandarin        | SRR3751832  | Wang et al. 2018  |
| mandarin_NFJ   | NFJ           | Mandarin        | SRR5796630  | Xu et al. 2013    |
| mandarin_NJ    | NJ            | Mandarin        | SRR3750668  | Wang et al. 2018  |
| mandarin_QH117 | QH117         | Mandarin        | SRR3822244  | Wang et al. 2017  |
| mandarin_QTJ   | QTJ           | Mandarin        | SRR5796863  | Wang et al. 2018  |
| mandarin_S6    | S6            | Mandarin        | SRR10163366 | Liang et al. 2020 |
| mandarin_S8    | S8            | Mandarin        | SRR10163365 | Liang et al. 2020 |
| mandarin_SCM   | SCM           | Mandarin        | SRR6188448  | Wu et al. 2018    |
| mandarin_SJ    | SJ            | Mandarin        | SRR3747529  | Wang et al. 2018  |
| mandarin_SNK   | SNK           | Mandarin        | SRR6188455  | Wu et al. 2018    |
| mandarin_SPG   | SPG           | Mandarin        | SRR3747540  | Wang et al. 2018  |
| mandarin_STJ   | STJ           | Mandarin        | SRR3756933  | Wang et al. 2018  |
| mandarin_WHPG  | WHPG          | Mandarin        | SRR5796644  | Wang et al. 2018  |
| mandarin_YJNJ  | YJNJ          | Mandarin        | SRR5796865  | Wang et al. 2018  |
| mandarin_YSJ   | YSJ           | Mandarin        | SRR3750648  | Wang et al. 2018  |
| mandarin_ZHJ   | ZHJ           | Mandarin        | SRR5796927  | Wang et al. 2018  |
| N18BUD         | BUD           | Citron          | SRR6188453  | Wu et al. 2018    |
| N18CAL         | CAL           | Calamondin      | SRR6188463  | Wu et al. 2018    |
| N18CLP         | CLP           | Mandarin        | SRR6188441  | Wu et al. 2018    |
| N18COR         | COR           | Citron          | SRR6188458  | Wu et al. 2018    |
| N18CSM         | CSM           | Mandarin        | SRR6188440  | Wu et al. 2018    |
| N18DNC         | DNC           | Mandarin        | SRR6188439  | Wu et al. 2018    |
| N18FOR         | FOR           | Kumquat         | SRR6188462  | Wu et al. 2018    |
| N18HUM         | HUM           | Citron          | SRR6188451  | Wu et al. 2018    |
| N18ICH         | ICH           | Papeda          | SRR6188454  | Wu et al. 2018    |
| N18LIM         | LIM           | Eureka Lemon    | SRR6188464  | Wu et al. 2018    |
| N18LMA         | LMA           | Rangpur lime    | SRR6188467  | Wu et al. 2018    |
| N18PON         | PON           | Poncirus        | SRR6188465  | Wu et al. 2018    |
| N18RRL         | RRL           | Red Rough lemon | SRR6188444  | Wu et al. 2018    |
| N18SourO       | SourO         | Sour orange     | SRR1023728  | Wu et al. 2018    |
| N18SVR         | SVR           | Atalantia       | SRR6188460  | Wu et al. 2018    |
| N18SweetO      | SweetO        | Sweet orange    | SRR1023639  | Wu et al. 2018    |
| N18UNS         | UNS           | Mandarin        | SRR6188446  | Wu et al. 2018    |
| N18VEU         | VEU           | Citron          | SRR6188459  | Wu et al. 2018    |
| O21CCLYP2      | CCLYP2        | Poncirus        | SRR12323706 | PRJNA648176       |
| O21CCNERO      | CCNERO        | Poncirus        | SRR7121817  | PRJNA438407       |
| O21JGLYP1      | JGLYP1        | Poncirus        | SRR12323705 | PRJNA648176       |
| O21ZKDPI50     | ZKDPI50       | Poncirus        | SRR12323703 | PRJNA648176       |
| O21ZKFLY       | ZKFLY         | Poncirus        | SRR12323700 | PRJNA648176       |
| O21ZKFMZ       | ZKFMZ         | Poncirus        | SRR12323698 | PRJNA648176       |
| O21ZKLleaf     | ZKLleaf       | Poncirus        | SRR12323702 | PRJNA648176       |
| O21ZKRUB       | ZKRUB         | Poncirus        | SRR12323699 | PRJNA648176       |
| Pt229          | Pomeroy       | Poncirus        | SRR5128229  | Wu et al. 2018    |
| Pt234          | Flying_dragon | Poncirus        | SRR5128234  | Wu et al. 2018    |

|                  |              |             |             |                   |
|------------------|--------------|-------------|-------------|-------------------|
| PtZK7            | ZK7          | Poncirus    | PRJNA554539 | Huang et al. 2021 |
| PtZK8            | ZK8          | Poncirus    | SRR14739657 | Huang et al. 2021 |
| pummelo_10Z      | 10Z          | Pummelo     | SRR3823645  | Wang et al. 2017  |
| pummelo_28H      | 28H          | Pummelo     | SRR3823225  | Wang et al. 2017  |
| pummelo_AJH      | AJH          | Pummelo     | SRR5802532  | Wang et al. 2018  |
| pummelo_CQ-016   | CQ-016       | Pummelo     | SRR3822303  | Wang et al. 2017  |
| pummelo_GXY      | GXY          | Pummelo     | SRR5802549  | Wang et al. 2018  |
| pummelo_GY-1     | GY-1         | Pummelo     | SRR14765190 | PRJNA736194       |
| pummelo_HB       | HB           | Pummelo     | SRR9127779  | Liang et al. 2020 |
| pummelo_HHSWY    | HHSWY        | Pummelo     | SRR5802582  | Wang et al. 2018  |
| pummelo_NJYPS    | NJYPS        | Pummelo     | SRR3848607  | Wang et al. 2017  |
| pummelo_Q-04     | Q-04         | Pummelo     | SRR3823455  | Wang et al. 2017  |
| pummelo_RL-06    | RL-06        | Pummelo     | SRR3823409  | Wang et al. 2017  |
| pummelo_SMST     | SMST         | Pummelo     | SRR9127778  | Liang et al. 2020 |
| pummelo_SR3-2    | SR3-2        | Pummelo     | SRR3822290  | Wang et al. 2017  |
| pummelo_STY      | STY          | Pummelo     | SRR14765189 | PRJNA736194       |
| pummelo_WSY      | WSY          | Pummelo     | SRR5796633  | Xu et al. 2013    |
| pummelo_YNMD     | YNMD         | Pummelo     | SRR9127777  | Liang et al. 2020 |
| pummelo_YNSJ     | YNSJ         | Pummelo     | SRR9127776  | Liang et al. 2020 |
| sjg21J1          | sjg21J1      | Kumquat     | SRR14766306 | PRJNA736109       |
| sjg21K1          | sjg21K1      | Kumquat     | SRR14766305 | PRJNA736109       |
| sjg21N1          | sjg21N1      | Kumquat     | SRR14766303 | PRJNA736109       |
| sjg21O1-1        | sjg21O1-1    | Kumquat     | SRR14766302 | PRJNA736109       |
| sjg_BLS07        | sjg_BLS07    | Kumquat     | SRR14761148 | PRJNA735863       |
| sjg_BZ01         | sjg_BZ01     | Kumquat     | SRR14761147 | PRJNA735863       |
| sjg_DR01         | sjg_DR01     | Kumquat     | SRR14761143 | PRJNA735863       |
| sjg_DYS002-5     | sjg_DYS002-5 | Kumquat     | SRR14761142 | PRJNA735863       |
| sjg_FC01         | sjg_FC01     | Kumquat     | SRR14761140 | PRJNA735863       |
| sjg_GHS01        | sjg_GHS01    | Kumquat     | SRR14761135 | PRJNA735863       |
| sjg_GT01         | sjg_GT01     | Kumquat     | SRR14761134 | PRJNA735863       |
| sjg_GZ01         | sjg_GZ01     | Kumquat     | SRR14761133 | PRJNA735863       |
| sjg_HK02         | sjg_HK02     | Kumquat     | SRR14761132 | PRJNA735863       |
| sjg_HS03         | sjg_HS03     | Kumquat     | SRR14761131 | PRJNA735863       |
| sjg_JK09         | sjg_JK09     | Kumquat     | SRR14761130 | PRJNA735863       |
| sjg_LS4          | sjg_LS4      | Kumquat     | SRR14761127 | PRJNA735863       |
| sjg_LS           | sjg_LS       | Kumquat     | SRR14761128 | PRJNA735863       |
| sjg_LT01         | sjg_LT01     | Kumquat     | SRR14761126 | PRJNA735863       |
| sjg_MJS02        | sjg_MJS02    | Kumquat     | SRR14761124 | PRJNA735863       |
| sjg_MP12         | sjg_MP12     | Kumquat     | SRR14761123 | PRJNA735863       |
| sjg_NQ03         | sjg_NQ03     | Kumquat     | SRR14761122 | PRJNA735863       |
| sjg_PN01         | sjg_PN01     | Kumquat     | SRR14761121 | PRJNA735863       |
| sjg_PN03         | sjg_PN03     | Kumquat     | SRR14761120 | PRJNA735863       |
| sjg_RYS          | sjg_RYS      | Kumquat     | SRR14761117 | PRJNA735863       |
| sjg_SD01         | sjg_SD01     | Kumquat     | SRR14761116 | PRJNA735863       |
| sjg_SK03         | sjg_SK03     | Kumquat     | SRR14761114 | PRJNA735863       |
| sjg_SL01         | sjg_SL01     | Kumquat     | SRR14761113 | PRJNA735863       |
| sjg_SY02         | sjg_SY02     | Kumquat     | SRR14761111 | PRJNA735863       |
| sjg_TX01         | sjg_TX01     | Kumquat     | SRR14761110 | PRJNA735863       |
| sjg_TZ           | sjg_TZ       | Kumquat     | SRR14761109 | PRJNA735863       |
| sjg_WH           | sjg_WH       | Kumquat     | SRR14761108 | PRJNA735863       |
| sjg_WP           | sjg_WP       | Kumquat     | SRR14761107 | PRJNA735863       |
| sjg_ZL01         | sjg_ZL01     | Kumquat     | SRR14761104 | PRJNA735863       |
| sour_orange_DD   | DD           | Sour orange | SRR3885049  | Wang et al. 2017  |
| sour_orange_GC   | GC           | Sour orange | SRR14765188 | PRJNA736194       |
| sour_orange_GP   | GP           | Sour orange | SRR9127856  | Liang et al. 2020 |
| sour_orange_HZL  | HZL          | Sour orange | SRR9127851  | Liang et al. 2020 |
| sour_orange_JJSC | JJSC         | Sour orange | SRR9127843  | Liang et al. 2020 |
| sour_orange_KYC  | KYC          | Sour orange | SRR9127852  | Liang et al. 2020 |



|                  |      |              |            |                   |
|------------------|------|--------------|------------|-------------------|
| sour_orange_XGCC | XGCC | Sour orange  | SRR9127850 | Liang et al. 2020 |
| sour_orange_XGTC | XGTC | Sour orange  | SRR9127841 | Liang et al. 2020 |
| sour_orange_XHC  | XHC  | Sour orange  | SRR9127848 | Liang et al. 2020 |
| sour_orange_ZGSC | ZGSC | Sour orange  | SRR3916939 | Wang et al. 2017  |
| sweet_orange_29B | 29B  | Sweet orange | SRR3926732 | Wang et al. 2017  |
| sweet_orange_A20 | A20  | Sweet orange | SRR3884831 | Wang et al. 2017  |
| sweet_orange_HML | HML  | Sweet orange | SRR3883647 | Wang et al. 2017  |
| sweet_orange_JC  | JC   | Sweet orange | SRR3884491 | Wang et al. 2017  |
| sweet_orange_LQ  | LQ   | Sweet orange | SRR3884773 | Wang et al. 2017  |
| sweet_orange_NHE | NHE  | Sweet orange | SRR3927459 | Wang et al. 2017  |
| sweet_orange_SO3 | SO3  | Sweet orange | SRR5799051 | Wang et al. 2017  |
| sweet_orange_WSO | WSO  | Sweet orange | SRR4240447 | Wang et al. 2017  |
| sweet_orange_XSO | XSO  | Sweet orange | SRR4237671 | Wang et al. 2017  |

References:

1. Xu, Q, et al. (2013) The draft genome of sweet orange (*Citrus sinensis*). *Nature Genetics* 45(1):59–66 .
2. Wu GA, et al. (2014) Sequencing of diverse mandarin, pummelo and orange genomes reveals complex history of admixture during citrus domestication. *Nature Biotechnology* 32(7):656-662.
3. Wang X, et al. (2017) Genomic analyses of primitive, wild and cultivated citrus provide insights into asexual reproduction. *Nature Genetics* 49(5):765-772.
4. Wu GA, et al. (2018) Genomics of the origin and evolution of *Citrus* . *Nature* 554(7692):311-316.
5. Liang M, et al. (2020) Evolution of self-compatibility by a mutant Sm-RNase in citrus. *Nature Plants* 6(2):131-142.
6. Wu GA, et al. (2021) Diversification of mandarin citrus by hybrid speciation and apomixis. *Nature Communications* 12(1):4377.

**Supplementary Table 7. The identified SVs by 184 short reads mapping.**

| <b>Position (bp)</b> | <b>Types</b> | <b>End (bp)</b> | <b>Length (bp)</b> |
|----------------------|--------------|-----------------|--------------------|
| 5376                 | <INV>        | END=354410      | 349034             |
| 17075                | <DEL>        | END=17114       | 39                 |
| 41962                | <INV>        | END=270852      | 228890             |
| 61131                | <INV>        | END=435483      | 374352             |
| 70665                | <INV>        | END=415505      | 344840             |
| 70679                | <INV>        | END=415493      | 344814             |
| 74861                | <INV>        | END=118391      | 43530              |
| 87613                | <DEL>        | END=87659       | 46                 |
| 95398                | <DEL>        | END=95437       | 39                 |
| 97615                | <DEL>        | END=97718       | 103                |
| 99663                | <DEL>        | END=99700       | 37                 |
| 100122               | <DEL>        | END=101386      | 1264               |
| 106573               | <INV>        | END=219403      | 112830             |
| 111199               | <INV>        | END=469141      | 357942             |
| 112830               | <INV>        | END=114004      | 1174               |
| 115323               | <INV>        | END=292403      | 177080             |
| 148601               | <INV>        | END=327614      | 179013             |
| 150661               | <INV>        | END=496990      | 346329             |
| 168554               | <INV>        | END=274509      | 105955             |
| 169920               | <INV>        | END=281668      | 111748             |
| 219164               | <INV>        | END=256671      | 37507              |
| 238454               | <INV>        | END=390534      | 152080             |
| 243220               | <DEL>        | END=244021      | 801                |
| 291362               | <INV>        | END=296756      | 5394               |
| 298165               | <INV>        | END=444339      | 146174             |
| 322861               | <INV>        | END=409003      | 86142              |
| 327967               | <DEL>        | END=328004      | 37                 |
| 343390               | <DEL>        | END=343487      | 97                 |
| 343561               | <INV>        | END=437464      | 93903              |
| 354156               | <DEL>        | END=354266      | 110                |
| 358061               | <DEL>        | END=358363      | 302                |
| 359806               | <INV>        | END=391431      | 31625              |
| 361724               | <DUP>        | END=393255      | 31531              |
| 377768               | <DEL>        | END=378789      | 1021               |
| 395376               | <DEL>        | END=395425      | 49                 |
| 402682               | <INV>        | END=470500      | 67818              |
| 412089               | <DEL>        | END=412128      | 39                 |
| 412664               | <INV>        | END=506607      | 93943              |

**Supplementary Table 8. The samples of mandarin in domestication.**

| <b>Name</b>    | <b>Classification_based on nuclear</b> | <b>Classification_based on mitochondria</b> |
|----------------|----------------------------------------|---------------------------------------------|
| Climent2013    | hybrids                                | domestication                               |
| Ma21ISH        | unclassified                           | wild                                        |
| Ma21OBN        | unclassified                           | domestication                               |
| Ma21RK3        | unclassified                           | wild                                        |
| Ma21TK1        | unclassified                           | wild                                        |
| N18CLP         | unclassified                           | wild                                        |
| N18CSM         | unclassified                           | domestication                               |
| N18DNC         | unclassified                           | domestication                               |
| N18LMA         | unclassified                           | unclassified                                |
| N18RRL         | unclassified                           | unclassified                                |
| N18UNS         | unclassified                           | domestication                               |
| O21CCLYP2      | hybrids                                | domestication                               |
| O21CCNERO      | hybrids                                | domestication                               |
| mandarin_18H   | MD1                                    | domestication                               |
| mandarin_19P   | MD2                                    | domestication                               |
| mandarin_20H   | MD1                                    | domestication                               |
| mandarin_BTJ   | MD2                                    | domestication                               |
| mandarin_CSNJ  | MD1                                    | domestication                               |
| mandarin_CYY   | wild                                   | wild                                        |
| mandarin_CZG   | MD2                                    | domestication                               |
| mandarin_DFZS  | hybrids                                | domestication                               |
| mandarin_DX1   | MD2                                    | domestication                               |
| mandarin_DX2   | wild                                   | wild                                        |
| mandarin_DX3   | wild                                   | wild                                        |
| mandarin_DX4   | wild                                   | wild                                        |
| mandarin_HPJ   | MD2                                    | domestication                               |
| mandarin_HZ    | wild                                   | wild                                        |
| mandarin_JGA   | MD2                                    | domestication                               |
| mandarin_JYY   | wild                                   | wild                                        |
| mandarin_KSH   | unclassified                           | domestication                               |
| mandarin_KYM   | hybrids                                | domestication                               |
| mandarin_LYJ   | MD2                                    | domestication                               |
| mandarin_MLTJ  | MD2                                    | domestication                               |
| mandarin_MS1   | wild                                   | wild                                        |
| mandarin_MS2   | wild                                   | wild                                        |
| mandarin_MSJ   | MD2                                    | domestication                               |
| mandarin_NFJ   | MD1                                    | domestication                               |
| mandarin_NJ    | MD2                                    | domestication                               |
| mandarin_QH117 | hybrids                                | domestication                               |
| mandarin_QTJ   | MD2                                    | domestication                               |
| mandarin_S6    | MD2                                    | domestication                               |
| mandarin_S8    | MD2                                    | domestication                               |
| mandarin_SCM   | unclassified                           | wild                                        |
| mandarin_SJ    | MD2                                    | domestication                               |
| mandarin_SNK   | unclassified                           | wild                                        |
| mandarin_SPG   | wild                                   | wild                                        |

|                  |         |               |
|------------------|---------|---------------|
| mandarin_STJ     | MD2     | domestication |
| mandarin_WHPG    | MD2     | domestication |
| mandarin_YJNJ    | MD1     | domestication |
| mandarin_YSJ     | MD2     | domestication |
| mandarin_ZHJ     | MD1     | domestication |
| sweet_orange_A20 | hybrids | domestication |

---

References:

1. Wang L, et al. (2021) Somatic variations led to the selection of acidic and acidless orange cultivars. *Nature Plants* 7(7):954-965.
2. Wu, G.A, et al. (2021) Diversification of mandarin citrus by hybrid speciation and apomixis. *Nature Communication*. 12(1):4377.

**Supplementary Table 9. Annotation of the candidate genes in admixture mapping analysis.**

| <b>GeneID</b> | <b>Pfam_annotation</b>                                                                          | <b>Swissprot_annotation</b>                        | <b>P_adj</b> |
|---------------|-------------------------------------------------------------------------------------------------|----------------------------------------------------|--------------|
| Fh1g02250     | Repeat domain in <i>Vibrio</i> , <i>Colwellia</i> , <i>Bradyrhizobium</i> and <i>Shewanella</i> | Unknown                                            | 7E-19        |
| Fh1g04410     | Sulfotransferase family                                                                         | Unknown                                            | 2E-75        |
| Fh1g04420     | Patatin-like phospholipase                                                                      | Patatin-like protein 3                             | NA           |
| Fh1g04430     | Patatin-like phospholipase                                                                      | Patatin-like protein 3                             | NA           |
| Fh1g04440     | CTLH/CRA C-terminal to LisH motif domain                                                        | --                                                 | 0.0096       |
| Fh1g04960     | Kinesin motor domain                                                                            | Kinesin-like protein KIN-4A                        | 1E-15        |
| Fh1g04990     | Protein kinase domain                                                                           | Probable inactive receptor kinase<br>At5g67200     | 1E-62        |
| Fh1g19290     | Protein tyrosine and serine/threonine kinase                                                    | Probable receptor-like protein kinase<br>At2g23200 | 0.0444       |
| Fh1g19300     | Unknown                                                                                         | Unknown                                            | 3E-20        |
| Fh1g19310     | NUDIX domain                                                                                    | Nudix hydrolase 3                                  | 0.0013       |
| Fh1g21950     | RNA recognition motif. (a.k.a. RRM, RBD, or RNP domain)                                         | U2 small nuclear ribonucleoprotein B               | 2E-27        |
| Fh1g21960     | Enoyl-(Acyl carrier protein) reductase                                                          | Short-chain dehydrogenase reductase 2a             | 2E-78        |
| Fh1g21970     | Retrotransposon gag protein                                                                     | Gag-pol polyprotein                                | NA           |
| Fh1g22380     | Secretory pathway protein Sec39                                                                 | MAG2-interacting protein 2                         | 0.7377       |
| Fh1g22690     | RNase H-like domain found in reverse transcriptase                                              | Genome polyprotein                                 | NA           |
| Fh1g22700     | Unknown                                                                                         | Unknown                                            | NA           |
| Fh1g24240     | RING-variant domain                                                                             | Unknown                                            | NA           |
| Fh1g24250     | Unknown                                                                                         | Unknown                                            | 2E-21        |
| Fh1g24850     | DNA polymerase family B                                                                         | DNA polymerase delta catalytic subunit             | 2E-89        |
| Fh1g24860     | Copine                                                                                          | E3 ubiquitin-protein ligase RGLG3                  | 9E-39        |
| Fh1g24870     | 2OG-Fe(II) oxygenase superfamily                                                                | Gibberellin 20 oxidase 2                           | NA           |
| Fh1g24880     | 2OG-Fe(II) oxygenase superfamily                                                                | Gibberellin 20 oxidase 1-B                         | NA           |
| Fh1g28730     | Unknown                                                                                         | Unknown                                            | NA           |
| Fh1g28740     | Unknown                                                                                         | Unknown                                            | NA           |
| Fh1g29320     | Unknown                                                                                         | Unknown                                            | NA           |
| Fh1g29330     | NB-ARC domain                                                                                   | Disease resistance RPP8-like protein 3             | NA           |
| Fh1g29580     | Leucine Rich repeats (2 copies)                                                                 | Probable inactive receptor kinase<br>At5g10020     | 1E-86        |
| Fh1g29590     | mTERF                                                                                           | Transcription termination factor MTERF8            | 0.672        |
| Fh1g29860     | Domain of unknown function (DUF4220)                                                            | Unknown                                            | 0.0578       |
| Fh1g29870     | Domain of unknown function (DUF4220)                                                            | Unknown                                            | 7E-05        |
| Fh1g29880     | Gamma-glutamyltranspeptidase                                                                    | Glutathione hydrolase 1                            | 1E-17        |
| Fh1g29950     | Unknown                                                                                         | Unknown                                            | 5E-15        |
| Fh1g29960     | RNA recognition motif. (a.k.a. RRM, RBD, or RNP domain)                                         | UBP1-associated protein 2B                         | 3E-14        |
| Fh2g06720     | EamA-like transporter family                                                                    | WAT1-related protein At5g40240                     | 4E-12        |
| Fh2g06730     | PDZ domain                                                                                      | Protease Do-like 9                                 | 0.9835       |
| Fh2g06740     | EamA-like transporter family                                                                    | WAT1-related protein At3g28050                     | 0.3384       |
| Fh2g06750     | EamA-like transporter family                                                                    | WAT1-related protein At5g40240                     | 4E-11        |
| Fh2g08140     | GDSL-like Lipase/Acylhydrolase                                                                  | GDSL esterase/lipase At5g14450                     | 6E-242       |
| Fh2g08150     | Reverse transcriptase (RNA-dependent DNA polymerase)                                            | LINE-1 retrotransposable element ORF2 protein      | 2E-16        |
| Fh2g08160     | GDSL-like Lipase/Acylhydrolase                                                                  | GDSL esterase/lipase At5g14450                     | 1E-64        |
| Fh2g08170     | Surfeit locus protein 2 (SURF2)                                                                 | Unknown                                            | 2E-18        |
| Fh2g08180     | MATH domain                                                                                     | Unknown                                            | NA           |
| Fh2g08310     | Sieve element occlusion N-terminus                                                              | Protein SIEVE ELEMENT OCCLUSION B                  | 1E-27        |
| Fh2g08320     | Mitochondrial domain of unknown function (DUF1713)                                              | Unknown                                            | 2E-09        |
| Fh2g08330     | Serine aminopeptidase, S33                                                                      | Alpha/beta hydrolase domain-containing protein 17C | 2E-15        |
| Fh2g08540     | Unknown                                                                                         | Signaling peptide TAXIMIN 2                        | 2E-30        |
| Fh2g08550     | DnaJ C terminal domain                                                                          | DnaJ homolog subfamily B member 1                  | 0.0005       |

|           |                                                      |                                                             |        |
|-----------|------------------------------------------------------|-------------------------------------------------------------|--------|
| Fh2g09060 | bZIP transcription factor                            | Basic leucine zipper 61                                     | 2E-70  |
| Fh2g09070 | Unknown                                              | Glutamate receptor 2.5                                      | 3E-38  |
| Fh2g09080 | Ligand-gated ion channel                             | Glutamate receptor 3.2                                      | 3E-86  |
| Fh2g09090 | Unknown                                              | Unknown                                                     | 4E-07  |
| Fh2g11140 | MULE transposase domain                              | Protein FAR1-RELATED SEQUENCE 5                             | NA     |
| Fh2g11150 | Translocon-associated protein beta (TRAPB)           | Translocon-associated protein subunit beta                  | 0.5238 |
| Fh2g11620 | Reverse transcriptase (RNA-dependent DNA polymerase) | Retrovirus-related Pol polyprotein from transposon RE1      | NA     |
| Fh2g14240 | Reverse transcriptase (RNA-dependent DNA polymerase) | Retrovirus-related Pol polyprotein from transposon TNT 1-94 | NA     |
| Fh2g14250 | Unknown                                              | Unknown                                                     | NA     |
| Fh2g14260 | Respiratory-chain NADH dehydrogenase, 30 Kd subunit  | NAD(P)H-quinone oxidoreductase subunit J, chloroplastic     | 0.0046 |
| Fh2g16160 | Unknown                                              | Unknown                                                     | NA     |
| Fh2g20990 | Unknown                                              | Unknown                                                     | 0.09   |
| Fh2g23780 | Vacuolar protein 14 C-terminal Fig4p binding         | Protein VAC14 homolog                                       | 0.0003 |
| Fh2g23790 | Ankyrin repeats (3 copies)                           | Ankyrin repeat-containing protein At2g01680                 | 0.2119 |
| Fh2g23800 | EF hand                                              | Probable calcium-binding protein CML25                      | 7E-206 |
| Fh2g32240 | 2OG-Fe(II) oxygenase superfamily                     | Probable prolyl 4-hydroxylase 3                             | 1E-05  |
| Fh2g32250 | Unknown                                              | Unknown                                                     | NA     |
| Fh2g32260 | Unknown                                              | Unknown                                                     | 2E-28  |
| Fh2g32270 | Zinc finger, C3HC4 type (RING finger)                | E3 ubiquitin-protein ligase RMA1H1                          | 3E-11  |
| Fh3g08560 | Unknown                                              | Alpha-galactosidase 3                                       | 1E-23  |
| Fh3g08570 | Protein kinase domain                                | MDIS1-interacting receptor like kinase 2                    | 8E-13  |
| Fh3g10420 | Unknown                                              | Unknown                                                     | NA     |
| Fh3g18740 | mttA/Hcf106 family                                   | Sec-independent protein translocase protein TATA            | 6E-30  |
| Fh3g18750 | PPR repeat                                           | Pentatricopeptide repeat-containing protein At3g18970       | 1E-16  |
| Fh3g18760 | Basic leucine-zipper C terminal                      | Light-inducible protein CPRF2                               | 1E-65  |
| Fh3g20730 | Exportin 1-like protein                              | Protein HASTY 1                                             | 9E-12  |
| Fh3g32850 | TCP family transcription factor                      | Transcription factor TCP23                                  | 9E-94  |
| Fh3g32860 | Alkaline and neutral invertase                       | Alkaline/neutral invertase CINV2                            | 3E-55  |
| Fh4g04320 | WD domain, G-beta repeat                             | Protein JINGUBANG                                           | NA     |
| Fh4g04330 | Ankyrin repeats (3 copies)                           | Ankyrin repeat-containing protein ITN1                      | 2E-26  |
| Fh4g04340 | Unknown                                              | Unknown                                                     | NA     |
| Fh4g04350 | Ankyrin repeats (3 copies)                           | Ankyrin repeat-containing protein ITN1                      | 0.3868 |
| Fh4g04870 | Protein kinase domain                                | Receptor-like protein kinase HSL1                           | 9E-16  |
| Fh4g04880 | Poly(A) polymerase central domain                    | Nuclear poly(A) polymerase 4                                | 0.0193 |
| Fh4g04890 | Uncharacterized protein family UPF0054               | Endoribonuclease YBEY, chloroplastic                        | 1E-39  |
| Fh4g04900 | Unknown                                              | Endoribonuclease YBEY, chloroplastic                        | 2E-20  |
| Fh4g07370 | Protein of unknown function, DUF538                  | Unknown                                                     | 2E-11  |
| Fh4g07380 | Heavy-metal-associated domain                        | Protein SODIUM POTASSIUM ROOT DEFECTIVE 1                   | 0.9433 |
| Fh4g08400 | U-box domain                                         | Putative E3 ubiquitin-protein ligase LIN-1                  | 8E-33  |
| Fh4g08410 | Mitochondrial import receptor subunit Tom22          | Transcription factor bHLH68                                 | 5E-11  |
| Fh4g08960 | Unknown                                              | Unknown                                                     | 3E-05  |
| Fh4g08970 | RNA dependent RNA polymerase                         | Probable RNA-dependent RNA polymerase 3                     | 3E-113 |
| Fh4g10850 | Unknown                                              | Unknown                                                     | NA     |
| Fh4g10870 | Oligosaccharyltransferase subunit 5                  | Transmembrane protein 258                                   | 0.0039 |
| Fh4g14920 | Unknown                                              | Unknown                                                     | 5E-29  |
| Fh4g14930 | Unknown                                              | Unknown                                                     | NA     |
| Fh4g15070 | Unknown                                              | Unknown                                                     | NA     |
| Fh4g20530 | WD domain, G-beta repeat                             | Polycomb group protein FIE1                                 | 7E-41  |
| Fh4g20540 | Unknown                                              | Unknown                                                     | 0.0123 |
| Fh4g20550 | PPR repeat family                                    | Pentatricopeptide repeat-containing protein At4g04790       | 6E-53  |

|           |                                                        |                                                         |        |
|-----------|--------------------------------------------------------|---------------------------------------------------------|--------|
| Fh4g20560 | Uncharacterised protein family (UPF0242)<br>N-terminus | Unknown                                                 | NA     |
| Fh4g20570 | Reverse transcriptase-like                             | Unknown                                                 | NA     |
| Fh4g29310 | Subtilase family                                       | Subtilisin-like protease SBT2.6                         | 3E-39  |
| Fh4g29320 | Glutaredoxin                                           | Glutaredoxin-C4                                         | 4E-36  |
| Fh5g22260 | gag-polypeptide of LTR copia-type                      | Unknown                                                 | NA     |
| Fh5g22270 | Leucine rich repeat                                    | Receptor like protein 27                                | NA     |
| Fh5g22280 | YCF9                                                   | Photosystem II reaction center protein Z                | 0.1573 |
| Fh5g22290 | Photosystem II protein                                 | Photosystem II CP43 reaction center protein             | 0.0381 |
| Fh5g22300 | hAT family C-terminal dimerisation region              | Zinc finger BED domain-containing protein RICESLEEPER 1 | NA     |
| Fh5g24310 | O-methyltransferase domain                             | Anthranilate N-methyltransferase                        | 0.5058 |
| Fh5g45460 | Telomere stability C-terminal                          | Replication stress response regulator SDE2              | 2E-30  |
| Fh5g45470 | Apg6 BARA domain                                       | Beclin-1-like protein                                   | 5E-05  |
| Fh5g45480 | Protease inhibitor/seed storage/LTP family             | Probable non-specific lipid-transfer protein 2          | 5E-39  |
| Fh5g45490 | Protease inhibitor/seed storage/LTP family             | Probable non-specific lipid-transfer protein 2          | 3E-09  |
| Fh5g45500 | Ion transport protein                                  | Cyclic nucleotide-gated ion channel 1                   | 0.2674 |
| Fh6g11060 | Tetratricopeptide repeat                               | Unknown                                                 | 4E-40  |
| Fh6g11070 | Unknown                                                | Light-harvesting complex-like protein OHP1              | 1E-55  |
| Fh6g11080 | Cyclin, N-terminal domain                              | Putative cyclin-D7-1                                    | NA     |
| Fh6g11090 | Vacuolar import and degradation protein                | Glucose-induced degradation protein 4 homolog           | 5E-14  |
| Fh6g11100 | Legume lectin domain                                   | L-type lectin-domain containing receptor kinase IV.1    | 6E-64  |
| Fh6g11110 | Potato inhibitor I family                              | Subtilisin inhibitor 1                                  | 3E-108 |
| Fh6g11120 | Legume lectin domain                                   | L-type lectin-domain containing receptor kinase S.4     | 5E-15  |
| Fh6g11290 | Enoyl-(Acyl carrier protein) reductase                 | Tropinone reductase homolog                             | 5E-06  |
| Fh6g11300 | ATP synthase subunit C                                 | ATP synthase subunit c, chloroplastic                   | 0.3488 |
| Fh6g11310 | Amino acid kinase family                               | Delta-1-pyrroline-5-carboxylate synthase                | 1E-19  |
| Fh6g16200 | Lecithin retinol acyltransferase                       | Unknown                                                 | 0.9265 |
| Fh6g16210 | Unknown                                                | Unknown                                                 | 8E-19  |
| Fh6g16220 | Unknown                                                | Uncharacterized protein At1g65710                       | 0.6012 |
| Fh6g16230 | Unknown                                                | --                                                      | 9E-17  |
| Fh7g05930 | RNase H-like domain found in reverse transcriptase     | Transposon Ty3-I Gag-Pol polyprotein                    | NA     |
| Fh7g05940 | Thioredoxin                                            | Protein disulfide isomerase-like 1-3                    | 6E-40  |
| Fh7g05950 | Unknown                                                | WPP domain-associated protein (Fragment)                | 0.0576 |
| Fh7g05960 | Serine aminopeptidase, S33                             | Caffeoylshikimate esterase                              | 5E-14  |
| Fh7g05970 | Unknown                                                | Unknown                                                 | 1E-12  |
| Fh7g06800 | Protein of unknown function (DUF4050)                  | Unknown                                                 | 0.482  |
| Fh7g06810 | GDSL-like Lipase/Acylhydrolase                         | GDSL esterase/lipase At2g30310                          | NA     |
| Fh7g06820 | Papain family cysteine protease                        | Probable cysteine protease RD19D                        | 2E-99  |
| Fh7g06830 | ACT domain                                             | ACT domain-containing protein ACR10                     | 9E-24  |
| Fh7g08540 | Unknown                                                | IQ domain-containing protein IQM3                       | NA     |
| Fh7g08550 | PPR repeat family                                      | Pentatricopeptide repeat-containing protein At2g27610   | 4E-23  |
| Fh7g08560 | Heavy-metal-associated domain                          | Copper transport protein ATX1                           | 5E-18  |
| Fh7g09040 | Sugar (and other) transporter                          | Inositol transporter 1                                  | 2E-15  |
| Fh7g12180 | Photosynthetic reaction centre protein                 | Photosystem II protein D1                               | 0.9035 |
| Fh7g14980 | Transferase family                                     | Malonyl-CoA:anthocyanidin 5-O-glucoside-6               | NA     |
| Fh7g14990 | Unknown                                                | Phenolic glucoside malonyltransferase 1                 | NA     |
| Fh7g16030 | BadF/BadG/BcrA/BcrD ATPase family                      | N-acetyl-D-glucosamine kinase                           | 9E-21  |
| Fh8g06160 | PPR repeat family                                      | Pentatricopeptide repeat-containing protein At2g15630   | 0.7838 |
| Fh8g06170 | CSL zinc finger                                        | Diphthamide biosynthesis protein 3                      | 8E-24  |

|           |                                                |                                                                       |        |
|-----------|------------------------------------------------|-----------------------------------------------------------------------|--------|
| Fh8g06180 | Phosphatidylinositol 3- and 4-kinase           | Serine/threonine-protein kinase SMG1                                  | 1E-13  |
| Fh8g21510 | Leucine rich repeat                            | Protein phosphatase 1 regulatory subunit 7                            | NA     |
| Fh8g21520 | Leucine rich repeat                            | Receptor-like protein EIX2                                            | 4E-21  |
| Fh8g21530 | Glycosyl hydrolases family 28                  | Exopolysaccharuronase (Fragment)                                      | NA     |
| Fh9g03310 | EF-hand domain pair                            | Probable serine/threonine-protein phosphatase 2A regulatory subunit B | 0.6445 |
| Fh9g03320 | Protein tyrosine and serine/threonine kinase   | Probable receptor-like protein kinase At5g38990                       | 5E-111 |
| Fh9g03330 | GTP1/OBG                                       | GTP-binding protein OBG, chloroplastic                                | 4E-10  |
| Fh9g14100 | Methyltransferase domain                       | eEF1A lysine and N-terminal methyltransferase                         | 7E-52  |
| Fh9g14110 | Potato inhibitor I family                      | Glu S.griseus protease inhibitor                                      | NA     |
| Fh9g14120 | Potato inhibitor I family                      | Proteinase inhibitor 1                                                | NA     |
| Fh9g14940 | Tetratricopeptide repeat                       | Outer envelope protein 61                                             | 8E-20  |
| Fh9g14950 | Retrotransposon gag protein                    | Unknown                                                               | NA     |
| Fh9g17180 | non-SMC mitotic condensation complex subunit 1 | Condensin complex subunit 1                                           | 5E-23  |
| Fh9g24810 | alpha/beta hydrolase fold                      | Carboxylesterase 1                                                    | 1E-17  |
| Fh9g24820 | alpha/beta hydrolase fold                      | Carboxylesterase 1                                                    | 3E-33  |
| Fh9g24830 | alpha/beta hydrolase fold                      | Carboxylesterase 1                                                    | 1E-07  |
| Fh9g24840 | alpha/beta hydrolase fold                      | Carboxylesterase 1                                                    | 3E-09  |
| Fh9g24860 | Unknown                                        | Carboxylesterase 1                                                    | NA     |
| Fh9g24870 | alpha/beta hydrolase fold                      | Carboxylesterase 1                                                    | 1E-35  |
| Fh9g25790 | AMP-binding enzyme                             | Oxalate--CoA ligase                                                   | 5E-48  |
| Fh9g25800 | Chlorophyll A-B binding protein                | Chlorophyll a-b binding protein 7, chloroplastic                      | 5E-06  |
| Fh9g25810 | Sec63 Brl domain                               | DEXH-box ATP-dependent RNA helicase DEXH12                            | NA     |
| Fh9g25820 | Sec63 Brl domain                               | DEXH-box ATP-dependent RNA helicase DEXH12                            | NA     |

Notes:

1. The orange bars indicate significantly expressed genes between eight pummelos and four mandarins during anther development.
2. The grey band indicate PPR genes related to mitochondrial function.
3. A *P*-value of 'NA' indicates the count of expression < 20.
4. RNA-seq data (cDNA libraries) obtained from the SRR list: SRR9593690, SRR9593691, SRR9593704, SRR9593696, SRR9593697, SRR9593699, SRR10168370, SRR10168371, SRR8862737, SRR8862738, SRR8862888, SRR8862889, SRR8863081, SRR8863082, SRR8863197, SRR8863198, SRR8868188, SRR8868189, SRR8872464, SRR8872465, SRR8873602, SRR8873603, SRR9124567, SRR9124568, SRR6489420, SRR6489421, SRR6489422, SRR6489423, SRR6489424, SRR6489425.
